# Supplementary material for: Aging alters the epigenetic asymmetry of HSC division
Source: PLoS Biol. 2018 Sep 20;16(9):e2003389. doi: 10.1371/journal.pbio.2003389 (PMC6168157; doi:10.1371/journal.pbio.2003389)
Supplement: S1 Data — (XLSX) [file pbio.2003389.s001.xlsx]

## Sheet: Fig. 1B
Time (hr)	Young HSCs (1st)						Aged HSCs (1st)						Young HSCs+Wnt5a (1st)						Aged HSCs+CASIN (1st)						Young (2nd)						Aged (2nd)						Young HSCs dead						Aged HSCs dead						Young HSCs+Wnt5a dead
1	0	0	0	0	0	0	0	0	0	0				0	0	0				0	0	0			0		0	0	0	0	0		0	0			0	0	0	0	0	0	0	0	0	0
19	0	3.92	2.899	0	1.449	8.955	1.49	3.77	8.696	1.449				5.55	1.471	1.471				0	5.556	9.859			0		0	0	0	0	0		0	0			1.59	3.77	1.429	1.471	1.429	0	2.9	1.85	0	0
24	1.64		11.594	7.692	5.797	9.091	1.56		11.429	13.235					7.353	5.882					9.722	15.714			0		0	0	0	0	0		0	0			3.17		1.429	4.412	1.429	1.492	7.25		0	1.449
32	26.67	50.98	41.176	28.571			23.81	30.19	35.294	34.783				37.73						24.14	27.143	39.437			0	1.96	1.471	0			0	0	2.941	1.449			6.25	3.77	2.857	7.353			8.69	1.85	1.449	1.449
40
42	55.93	88.23	77.941	48.276	85.507	72.727	61.9	81.13	66.176	83.824				83.02	67.164	68.182				60	58.571	73.913			10.17	33.33	29.412	17.241	33.333	30.303	9.5	33.96	13.235	20.588			7.81	3.77	2.857	14.706	1.429	1.493	8.69	1.85	1.429	1.449
48	67.8	90.48	86.154			84.615	77.42	81.82	85.075					87.18		80.303				63.64	80.597				22.81	69.05	50.769			44.615	36.2	54.54	32.836				7.81	3.77	7.143			2.985	10.15	1.85	2.899
[truncated: 12 more columns]

## Sheet: Fig. S1B
	Young Control							Aged control							Aged CASIN 5µM							Young -Wnt5a
Metaphase	50	50	34.2105	64.2857	25	20.8333	19.0476	42.8571		29.2683	13.333	23.0769	20.8333		50	57.1428	18.75	11.111	14.2857			25	30.7692
Anaphase	7.1428	28.5714	21.0526	7.1428	5.555	12.5	19.0476	14.2857		9.7561	0	3.8461	8.3333		10	14.2857	6.25	11.111	0			0	23.0769
Telophase	42.8571	21.4286	44.7368	28.5714	69.4444	66.6667	61.9048	42.8571		60.9756	86.667	73.0769	70.8333		40	28.5714	75	77.777	85.7142			75	46.1538

## Sheet: Fig. 1D
Young Ctr		Aged Ctr		Young Wnt5a		Aged CASIN
55.292		85.9831		81.542		44.7233
71.6545		68.7477		99.2838		82.7853
68.4019		73.9832		68.8804		34.8209
39.3781		64.9285		37.0911		68.2927
13.6659		45.7423		94.188		80.7223
86.2187		90.4473		71.0581		75.7327
71.854		83.1554		93.6962		85.6339
46.7072		43.5799		82.1399		92.6238
87.6502		67.2951		63.5664		70.5265
66.781		52.1795		46.9843		49.9773
82.9134		42.1262		68.8882		24.1079
75.158		89.0886		95.5435		87.4084
71.4874		84.7703		79.759		39.516
54.9718		77.3176		77.8915		79.608
75.2829		97.5446				64.7626
70.7853		95.283				59.914
63.0479		99.2741				25.7774
62.9944		63.3035				28.6826
71.992		94.3804				82.8528
54.2387		82.423				75.7388
50.3412		78.7573				45.91
42.5653		90.5274				48.9637
61.475		85.3874				95.4696
34.3775		82.3124				33.3171
62.0734		76.0778				94.4688
		46.8294				25.4338

## Sheet: Fig. 2B
Young Ctr		Aged Ctr		Young Wnt5a		Aged CASIN
49.9639		85.7669		79.4766		66.5883
45.1685		77.1289		87.0948		76.8006
51.7588		98.6521		85.5027		77.9661
82.4828		65.1669		99.5752		57.6671
72.3514		73.37		89.2322		41.2795
48.7253		77.1539		95.6312		37.6317
81.8448		99.2392		99.2991		94.8181
90.1416		60.5485		81.465		76.5641
69.8263		96.6858		91.6451		74.53
93.9048		73.6876		83.7771		69.6988
89.1201		88.4796		70.0229		89.0615
68.0489		81.7263		62.6291		37.2577
78.2131		98.8208		77.1865		65.9559
93.527		99.7383		99.4632		78.6996
60.7008		95.2814		81.0471		71.6662
75.1762		78.5231		63.5463		77.5942
81.9897		95.4296		76.9536		87.284
72.4957		90.4092		60.953		87.461
91.7801		97.8124		93.3013		52.7666
92.1408		72.3988		59.6738		94.8908
78.2895		68.47		96.0218		72.7142
79.8298		80.225		88.706		91.3824
88.1606		56.9447		54.6578		66.1471
72.2501		69.3636		84.0072		99.9461
68.8751		97.7462		62.785		84.4351
81.7131		71.5493		89.5966		65.7704
34.5091		96.29				92.5881
26.1082		97.2344				71.3082
74.6978		78.2609				89.6756
93.8142		91.9661				30.4684
84.7835		78.5008				79.5333
91.4711		75.1173				61.9152
79.0225		77.9164				84.0861
49.7344		61.8538				82.0175
67.8123		93.6378				97.814
90.7201		49.9417				82.0251
99.3741		96.5246				97.7783
87.1711						59.465
40.1527						75.0136
64.5319						62.6108
45.8309

## Sheet: Fig. S1C
young HSCs	Daughter 1	Daughter 2
	60.28	33.33
	36.355	26.05
	43.99	30.09
	38.27	15.07
	53.93	7.37
	35.12	30.28
	28.21	20.27
	41.15	19.22
	33.28	29.17
	37.9	25.31
	12.7	10.53
	47.46	35.67
	24.27	17.35
	28.36	15.59
	33.58	25.28
	33.976	24.05
	27.836	17.55
	38.94	24.53
	24.85	17.89
	41.994	22.777
	13.19	6.64
	17.62	7.5
	31.769	19.53
	24.9	8.56
	54.79	34.01

## Sheet: Fig. S1D
aged HSCs	Daughter 1	Daughter 2
	35.6	30.61
	26.91	18.5
	42.78	31.65
	31.45	20.42
	44.86	20.52
	26.38	23.86
	29.98	24.93
	35.28	15.375
	36.6	24.63
	39.23	20.47
	23.121	9.74
	36.393	32.422
	56.39	47.802
	52.64	40.7
	31.36	30.59
	31.8	30.3
	26.175	25.985
	28.624	18.12
	35.59	33.59
	30.21	24.9
	30.74	24.21
	27.87	25.23
	24.91	21.27
	13.06	10.75
	26.21	19.94
	35.104	16.439

## Sheet: Fig. S1E
aged+casin HSCs	Daughter 1	Daughter 2
	37.05	16.57
	36.19	29.96
	46.61	16.23
	40.59	27.72
	38.49	31.07
	34.12	25.84
	31.115	26.645
	28.47	26.37
	45.77	32.28
	21.99	10.99
	22.98	5.54
	32.76	28.635
	21.075	8.328
	34.18	27.21
	26.032	16.859
	20.93	12.54
	22.19	5.72
	17.99	5.16
	24.068	19.941
	27.41	20.76
	19.12	8.778
	15.44	7.56
	18.1	17.28
	20.56	6.85
	25.13	23.74
	25.36	6.45

## Sheet: Fig. S1F
young+wnt HSCs	Daughter 1	Daughter 2
	34.89	28.45
	22.34	22.18
	18.22	12.55
	34.24	12.7
	17.55	16.53
	33.55	23.84
	30.775	28.835
	24.02	19.73
	25.6	16.273
	30.01	14.1
	27.218	18.75
	18.4	17.58
	27.721	22.11
	9.77	7.61

## Sheet: Fig. S1G
young HSCs	Daughter 1	Daughter 2
	97.01	48.47
	31.46	14.21
	25.87	13.39
	50.75	41.86
	50.31	36.4
	45.11	21.98
	95.51	78.17
	38.14	34.38
	26.48	18.49
	71.04	66.71
	65.35	58.24
	41.72	28.39
	35.48	27.75
	34.76	32.51
	42.52	25.81
	32.63	24.53
	32.87	26.95
	34.54	25.04
	38.2	35.06
	37.79	34.82
	72.96	57.12
	50.52	40.33
	33.87	29.86
	51.82	37.44
	33.96	23.39
	50.2	41.02
	48.48	16.73
	53.24	13.9
	95.96	71.68
	49.63	46.56
	48.96	41.51
	39.63	36.25
	32.94	26.03
	25.415	12.64
	36.66	24.86
	74.57	67.65
	41.54	41.28
	49.03	42.74
	65.5	26.3
	40.91	26.4
	69.8	31.99

## Sheet: Fig. S1H
aged HSCs	Daughter 1	Daughter 2
	48.9	41.94
	91.95	70.92
	62.32	61.48
	69.79	45.48
	78.22	57.39
	64.65	49.88
	44.69	44.35
	66.36	40.18
	80.26	77.6
	62.86	46.32
	46.96	41.55
	62.33	50.94
	52.58	51.96
	45.85	45.73
	64.85	61.79
	62.02	48.7
	69.14	65.98
	45.46	41.1
	50.74	49.63
	62.28	45.09
	53.79	36.83
	35.55	28.52
	66.31	37.76
	49.81	34.55
	54.13	52.91
	57.96	41.47
	58.49	56.32
	114.26	111.1
	77.05	60.3
	86.01	79.1
	52.56	41.26
	81.02	60.86
	66.52	51.83
	65.38	40.44
	64.6	60.49
	85.72	42.81
	69.92	67.49

[truncated: 23 more sheets: Fig. S1I, Fig. S1J, Fig. S1K, Fig. 3A, Fig. 3E, Fig. S3B, Fig. S3C, Fig. S3F, Fig. S3G, Fig. S3H, Fig. S3I, Fig. 4D, Fig. 4E, Fig. 5A, Fig. S5B, Fig. 5B, Fig. 6C, Fig. 6D, Fig. 6H, Fig. 6I …]
