# Supplementary material for: Aging alters the epigenetic asymmetry of HSC division
Source: PLoS Biol. 2018 Sep 20;16(9):e2003389. doi: 10.1371/journal.pbio.2003389 (PMC6168157; doi:10.1371/journal.pbio.2003389)
Supplement: S4 Table — The table also shows how many cells per arm/condition were finally used. (XLSX) [file pbio.2003389.s024.xlsx]

## Sheet: Sheet1
CELLS	COUNT
Number of Cells Sequenced	298
Number of Cells kept for gene expression analysis [excessive 0 or missing values across genes]	293
GENES
Number of Annotated Genes	23793
Number of genes kept for gene expression analysis [excessive 0 or missing values across samples]	15976
Number of Cells by Experimental Conditions
	Number of cells
Young	56
Aged	78
Aged+CASIN	46
Young+WNT5A	38
