# Supplementary material for: Aging alters the epigenetic asymmetry of HSC division
Source: PLoS Biol. 2018 Sep 20;16(9):e2003389. doi: 10.1371/journal.pbio.2003389 (PMC6168157; doi:10.1371/journal.pbio.2003389)
Supplement: S5 Table — (XLS) [file pbio.2003389.s025.xls]

## Sheet: Supplementary Table6
Table S5
Mm_HSC_Runx1_Wu	Mm_HSC_Tcf7_Wu	Mm_HSC_Ivanova	Mm_HSC_Ramalho	HSC_Explorer	Mm_LT_HSC_Venezia	Mm_Proliferation_Venezia	Mm_Quiescence_Venezia	Mm_Adult_HSC_UP_Venezia	Polarity_factors_Ting	Novel_HSC_regul_polar_Ting
na	na	na	na	na	na	na	na	na	na	na
1110007C09Rik	1110007C09Rik	1110017D15Rik	0610009D07Rik	ALDOA	Cd1d2	Gene Symbol	Igh-4	Gnb5	Akt1	Ap2a2
1700026L06Rik	1700025G04Rik	1300001I01Rik	0610010K06Rik	Ackr3	Smpd2	Gart	1200006I17Rik	Jun	Anapc5	Gpsm2
2310014H01Rik	1700026L06Rik	1700007K13Rik	0610011F06Rik	Actg1	2610007K22Rik	Gpi1	Crem	AI643885	Ap2a2	Tmod1
2810408A11Rik	2310014H01Rik	1700010I14Rik	0610031J06Rik	Adipoq	Il4ra	Atp5a1	Snx17	3110043O21Rik	Apc	Kif3a
2900026A02Rik	2310047C17RIK	2310036O22Rik	1110001J03Rik	Agtr2	Araf	Pep4	BC010348	Rnf19	AurkA	Racgap1
4931406C07Rik	2900026A02Rik	2410004B18Rik	1110007C09Rik	Aif1	Inpp5d	Pja1	Cerk	Crem	AurkB	Ccnb1
5031439G07Rik	4930427A07Rik	2610002J02Rik	1110007M04Rik	Akt1	6330580J24Rik	Pigf	Acox1	Anxa4	AurkC
A430078G23Rik	4930515G01Rik	2900002H16Rik	1110014J01Rik	Akt2	Txnip	0610009H04Rik	Cd1d2	Cd24a	Bicd1
AW411699	5031439G07Rik	4931414P19Rik	1110019N10Rik	Angpt1	Gab1	Tfdp1	Smpd2	Pkd2	Bmp4
Abca2	ARHC	5830418K08Rik	1110038D17Rik	Angpt2	Hist1h1c	Atox1	2610007K22Rik	Mkrn1	Carm1
Abhd2	AW411699	6330577E15Rik	1190002H23Rik	Anxa1	Scotin	Cox4i1	Il4ra	Nbr1	Ccnb1
Abr	Abca2	9930012K11Rik	1300001I01Rik	Apoe	Bgn	Raet1c	Nfatc1	Acox1	CD48
Acox3	Abcg1	AI197253	1500011H22Rik	Arnt	Ctsf	Pold1	8430421H08Rik	Ddx3x	Cdc42
Adssl1	Abhd2	Aasdhppt	1500035H01Rik	Atp5c1	Mfng	Lrp2	Araf	Lamp2	Cdcp1
Akap13	Abr	Abcc1	1700012B15Rik	Axin2	H2-Ab1	D7Wsu128e	Ncf2	Myst2	Cdk2
Amdhd2	Actn1	Abce1	1700017B05Rik	BQ562468	Ndn	2310015N07Rik	Wdr23	Cd72	Clip1
Ankrd13d	Acvr1b	Abcf2	1700021F05Rik	Bax	Nfkbia	2310015N07Rik	Jtb	Twsg1	Ctnna1
Ankrd63	Adam15	Abhd17c	1810015C04Rik	Bbc3	Ctsl	2810026P18Rik	Inpp5d	Mtf2	Ctnnb1
Anxa1	Adamts10	Abl1	1810030O07Rik	Bcl2	Ldh2	1500004O14Rik	Dok1	Nfatc1	Dctn1
Anxa6	Adssl1	Acadl	1810037I17Rik	Bcl2l1	Ulk1	1500004O14Rik	Plxna3	Osmr	Dlg3
Ap3m2	Afap1l1	Acadvl	1810063B07Rik	Bglap	Irf1	Rarsl	Nfil3	Ncf2	Dll1
Apob48r	Aff4	Acrv1	2010004A03Rik	Bgn	Tgtp	Pla2g12	Ctf1	Wdr23	Dynlt1
Appl1	Ahdc1	Actl7a	2010100O12Rik	Bhlhb2	Igtp	Tnfrsf18	Cflar	Jund1	Ect2
Arhgap15	Akap13	Acy1	2010109K11Rik	Bmi1	4921526G09Rik	Sec61a1	Mrc1	Hlx	Egfr
Arhgap17	Als2	Ada	2310004I24Rik	Bmp4	Gadd45b	Jtv1	1110018F06Rik	Apba3	Gfi1
Arhgap30	Amdhd2	Adam11	2310044H10Rik	COX2	Grcb	Refbp1	1810024J13Rik	5730525G14Rik	Gnai2
Arhgef18	Ankrd13d	Adck1	2400003C14Rik	Cat	Ltc4s	D0H8S2298E	Adcy7	MGC68300	Gnb2
Arid5a	Ankrd44	Adcyap1r1	2410001C21Rik	Cbfb	Irf6	Ddx1	Fbxl3a	Plscr1	Gpsm2
Arvcf	Ankrd63	Afap1l1	2410002F23Rik	Cbx7	H2-Aa	Asb3	Tfip11	C820004H04Rik	Insc
Atp13a2	Anks1	Agr2	2410015N17Rik	Cbx8	Rex3	1110008H02Rik	Fosb	Flt3l	Kif3a
Atp2a3	Anxa5	Agxt	2410022L05Rik	Ccl2	8430421I07Rik	2310016M24Rik	2610025P08Rik	Nfil3	Lgl1
Atp8b4	Appl1	Ahsa2	2610002J02Rik	Ccl5	Krt1-18	Ctsz	AU020206	Madh1	Mapre3
B4galt5	Arhgap17	Ahsg	2700038C09Rik	Ccl7	H2-Eb1	Nme1	B230113M03Rik	Stat4	Mark1
BC028528	Arhgap30	Ak1	2700097O09Rik	Ccna2	Pik3r1	Pdk3	Sh3glb1	Ctf1	Msi1
BQ562468	Arhgef18	Akap9	2810432L12Rik	Ccnb1	Maged1	Anxa1	1300010A20Rik	Slc20a1	Msi2
Bahcc1	Arhgef2	Akr1b8	2900010M23Rik	Ccnb2	DXImx38e	Kpnb3	Cldn5	Mrc1	Myh10
Batf	Arid5a	Akr1c21	2900042B11Rik	Ccnc	Iigp	Tgm2	5730403M16Rik	Nrip1	Myh11
Bcl2l11	Arvcf	Aldh1l1	3110043O21Rik	Ccnd1	2700030M23Rik	2310047C21Rik	Dusp1	Mapk6	Myo6
Bcl3	Atn1	Aldh7a1	4930507D05Rik	Ccnd2	Gtpi	Nsep1	Dnajb6	Fbxl3a	Ncl
Bcr	Atp11a	Alg3	4930560O18Rik	Ccne1	E030024M05Rik	Rpl37a	Slc12a7	C130027E04Rik	Neurl
Bmp2k	Atp13a2	Amigo2	4930570C03Rik	Ccne2	Tob1	Pdcd5	Hsd3b7	Frat2	Notch1
Bmpr2	Atp2a3	Ankrd23	4931406C07Rik	Ccnf	Prnp	D13Wsu123e	6330580J24Rik	Ahi1	Numa1
Calr	Atp8b4	Anxa10	4931406I20Rik	Cd34	2410019G02Rik	Ipo4	Mat2a	4933432B13Rik	Numb
Camk2b	B2m	Apbb2	4933428G09Rik	Cd44	1300004C08Rik	D7Wsu86e	Crem	F11r	Pard6a
Ccl9	B4galt5	Apoa5	5033414D02Rik	Cd5l	Samhd1	Csda	Txnip	4930451A13Rik	Pard6b
Cd244	BC003321	Apom	5430432M24Rik	Cd6	Fln29	Sod2	Lcn2	Atp2a3	Ppp2r1a
Cd300lf	BQ562468	Aqp5	5730403B10Rik	Cdc25a	AI325941	Cad	Hccs	Fosb	Prkci
Cd33	Bach1	Aqp6	5730469M10Rik	Cdc2a	Cd1d1	5730406I15Rik	1200004M23Rik	Rab6ip1	Prkcz
Cd48	Bahcc1	Arbp	5730494M16Rik	Cdc42	Aim1	Hnrpa1	Gab1	2310050N11Rik	Prom1
Cd68	Baz2b	Arf6	6330409N04Rik	Cdh2	Ctla2b	6330514M23Rik	Snap25bp	Atf3	Prox1
Cd69	Bcl2l1	Arhgdia	9130011J15Rik	Cdk4	AW538196	Nudt9	Fos	AU020206	Pten
Cd7	Bcl2l11	Arl10	Abca1	Cdk6	Pscdbp	Capza2	Sox6	9030612M13Rik	Ptpn1
Cd72	Bcl3	Arl2	Abcb1b	Cdkn1a	Map1lc3	Ranbp1	Gtpbp1	6330412C24Rik	Ptpn2
Cdca7	Bcr	Arl3	Abcb8	Cdkn1b	Ldlr	Sh3d3	Nr4a2	Cldn5	Rab11Fip1
Cds2	Bin1	Armet	Abcd3	Cdkn1c	1110032C13Rik	Mcm3	Fdft1	Itsn	Rab11Fip3
Cep19	Bmp2k	Arrdc2	Abcf3	Cdkn2a	Socs3	Psmc3	Tro	5730403M16Rik	RacGap1
Cfp	Bmpr2	Asah2	Abcg1	Cdkn2b	6330407G11Rik	6230416J20Rik	Snk	Dusp1	Scrb
Clec11a	Calcoco1	Atf6b	Abcg2	Cdkn2c	D4Wsu53e	5031439A09Rik	Mapk12	Wdr26	Snai1
Clec4e	Calr	Atoh8	Abhd14a	Cdkn2d	Dusp2	Sfrs3	Vcam1	Dnajb6	Snai2
Clip2	Camk2a	Atp1b1	Acadl	Cfl1	Clk	Trip13	Myb	Slc12a7	Spata2
Coro7	Camk2g	Atp2c2	Acadm	Chaf1a	Clk3	Dnmt1	5530400H20Rik	Arf4	Spin1
Cpa3	Capn5	Atp5g2	Acot1	Chek2	C79248	Hmgn2	Mcl1	Hsd3b7	Stat3
Cpne3	Cbfb	Atp5g3	Acox1	Clasp1	Zfp288	Pole2	H2-K	1500010B24Rik	Stau1
Crocc	Ccdc64	Avpi1	Actr10	Clu	Tnfrsf1b	Adprt1	B830009D23Rik	B3gnt1	Stau2
Csad	Ccnd1	Avpr1a	Acvr2a	Col1a1	Sema4b	Tfdp1	Tm4sf2	Rab10	Stx4a
Cuedc1	Ccnj	B4galt4	Acyp1	Col4a1	Ddx54	Nmt1	Aplp2	3230401D17Rik	Tmod1
Cxxc5	Cd244	BG074081	Adam3	Cox4i1	2410001C21Rik	Ptgds	Alas1	Atp6ap2	Trim2
D16Ertd472e	Cd34	BG088116	Adam9	Csf1	P2rx4	Mrps25	Igh-6	Lats2	Trim3
Dgka	Cdca7	Baz1b	Adar	Csf1r	Arih2	Atp5g2	Ldb2	Map1lc3	Trim32
Dhrs3	Cdh17	Bcar1	Adcy6	Csf3	Ubxdc2	Pcdh7	Chrnb1	Riok3	Tuba1a
Diap1	Cdh24	Bckdha	Adcy7	Ctnnb1	C530046L02Rik	2610524H06Rik	H2-Q7	Zfp216	Ywhab
Dusp1	Cdk6	Bckdhb	Adora2a	Ctnnd1	Procr	Chek1	Ddx6	0710001O03Rik
Eif4e3	Cdkn1a	Bcor	Adprh	Cxcl10	1200014P03Rik	Serf1	Hist1h1c	Catnb
Elmo1	Cds2	Bhlhb2	Aebp2	Cxcl12	Stat3	Ttk	Il6st	Def8
Ern1	Cep19	Bms1	Agr2	Cxcl14	Csad	Pola1	Son	Crem
Etv6	Cerk	Bod1	Ahr	Cxcl5	2010315L10Rik	BC006933	Ilvbl	Hccs
Evi2a	Cers5	Bphl	Aim1	Cxcr2	Tap2	Rnase2	Ctsh	Cggbp1
Evl	Clec11a	Bsn	Aip	Cxcr4	Eya2	E130315B21Rik	Ptpn1	8430410A17Rik
Exoc3l	Clip2	Btc	Ak1	Dag1	Hdac5	Cdc7	Trip6	Usp33
Eya2	Cmtm7	C19orf18	Ak3l1	Dcc	Myd116	Cdc6	Pl6	Capn7
F13a1	Coro1a	C20orf79	Akap8l	Dcn	Tie1	Rad51l1	Synpo	Rcn
F2r	Coro7	C2cd2	Akr1b3	Dkk1	Nr4a2	1110018J12Rik	1110059H15Rik	Fos
F2rl2	Cotl1	C5orf50	Akr1c13	Dll1	Slc22a17	Acyp2	Scotin	Sos1
Fcer1g	Crlf3	C6	Akr1e1	Dll4	BC042396	Pgm2	Asns	Pde8a
Fcgr2b	Crocc	C7orf16	Aldoc	Dtx1	D19Wsu162e	Gmnn	1110018O08Rik	9630050M13Rik
Fcgr3	Crtc3	CDK9	Amz2	E2f1	Pkd1	Tardbp	B830022L21Rik	BC012974
Fes	Ctxn1	Cabp2	Angptl2	Eef1g	Prkcabp	Mcm3	2310075G12Rik	D130005A03
Fhod1	Cuedc1	Calm4	Ank	Egr1	Mpra	1110060F11Rik	2310061B02Rik	Nr4a2
Fkbp5	Cxxc5	Calr	Ankrd13a	Eif4ebp1		2310042P20Rik	Ulk2	Fdft1
Flywch1	D16Ertd472e	Cap2	Antxr2	Epo		C81234	Blk	Tro
Fos	Dcakd	Capsl	Ap1b1	Erp29		D3Ertd330e	Bgn	LOC207685
Fzd2	Dexi	Carkd	Ap1m1	Ezh1		Prps2	Lrp10	Vcam1
Gadd45b	Dhrs3	Cartpt	Ap2a2	Ezh2		Ndufab1	Mbp	Gcnt1
Galns	Dhrs7	Casc3	Ap2m1	Fgf2		2610201A13Rik	3110001A13Rik	Arl4
Galnt11	Diap1	Casp12	Apbb1ip	Flt1		Gpiap1	1500001L20Rik	Rab11a
Galnt6	Dlx1	Cbfb	Apbb2	Flt3		Gcs1	Inpp5e	Ywhaq
Gatad1	Dnajb9	Cbx1	Aplp2	Flt3l		Ris2	Stab1	Ndfip1
Gfod1	Dnajc6	Ccar1	Apoe	Fmod		Msh2	Ctla2a	Igk-V8
Glipr1	Dnmt3b	Ccdc71	Araf	Foxo1		Ndufv2	Tead2	Mcl1
Gng2	Dok2	Ccdc80	Ard1	Foxo3		Stag1	Ctsf	H2-K
Gpc2	Dok3	Ccdc90b	Arfgap3	Foxo4		Lig1	Lrg	2610022K04Rik
Gpr141	Dpysl2	Ccdc94	Arhgap21	Fzd8		Entpd5	4930504E06Rik	B830009D23Rik
Gpr56	Dtnbp1	Ccnd3	Arhgef2	Gab2		Osf2	Spec1	Rnpc2
Gpr97	Dusp1	Cd276	Arhgef3	Gapdh		Rbbp4	Capn6	Tm4sf2
Gpsm1	Dusp2	Cd2bp2	Arhgef5	Gata2		Tmpo	Rps6ka2	1810054D07Rik
Grap	Dusp4	Cd34	Arhgef7	Gata3		Hells	Dab2	9530072E15Rik
Grn	E130012A19Rik	Cd3d	Arih1	Gclc		D730042P09Rik	Copeb	Ddx5
Gzmb	Egln3	Cd69	Arih2	Gclm		Tbca	Cd14	Aplp2
Gzmc	Ehd4	Cd93	Arl2	Gfi1		Pawr	Dvl1	Bteb1
H2-D1	Eif4e3	Cdh15	Armcx2	Gfi1b		Cd5l	Dusp12	Lmo2
Haao	Elmo1	Cdk2ap2	Arpc3	Gja1		Fzd4	Dnajb10	Chrnb1
Havcr2	Emilin2	Cdk4	Arsa	Gjc1		1110020P15Rik	Tinf2	H2-Q7
Hdac6	Eml4	Cdk6	Art5	Gli1		Xpo1	Mpeg1	Tgfb1i4
Hes6	Ephb2	Cdt1	Asns	Gsk3b		Mre11a	C230093N12Rik	Lasp1
Hist1h1e	Erg	Cebpz	Asrgl1	Hes1		Idh3a	Minpp1	Ddx6
Hist1h2bj	Ern1	Cecr6	Atf3	Hes5		Tubb5	Cd19	Ifrg15
Hist1h4d	Etv4	Cend1	Atn1	Hey1		1110001J03Rik	2010008K16Rik	Cnn2
Hmga2	Etv6	Cenpm	Atp1a1	Hif1a		2310021G01Rik	Gja1	Rab2
Icam2	Evl	Cep170b	Atp2a2	Hif1an		Grhpr	Mfng	LOC226442
Ier2	Exoc3l	Cftr	Atp5d	Hlf		Kif22	Chk	9130011J15Rik
Ier3	Eya2	Chchd6	Atp6v1d	Hmox1		Ndufb2	Eif4g2	Il6st
Igf2bp3	F2r	Chd5	Atxn2	Hoxa10		Itga4	Ddt	AA960558
Igfbp4	F2rl2	Chic1	Aup1	Hoxa4		Shfdg1	Impdh2	Ilvbl
Ikzf2	Fam212a	Chrnb1	Avpi1	Hoxa5		Bzw2	5730403B10Rik	Bcl10
Il10ra	Fam214b	Chst1	Axin1	Hoxa7		Chaf1a	Lyzs	Dazap2
Il12rb2	Fes	Cldn8	Azi1	Hoxa9		Lpl	Gstm5	Stk38
Il18rap	Fgf3	Clk3	Azi2	Hoxb4		Rfc5	H2-Ab1	Pbef
Il2rg	Fkbp1a	Clpb	B3galnt1	Hoxc4		Uble1a	Ndn	2410018D16Rik
Il6	Fkbp5	Clps	B3gat3	Hoxd4		1110005L13Rik	Grp58	Ptp4a1
Impa2	Fli1	Cmtm7	BC003993	Hp		2610201A13Rik	Stxbp2	Mgea5
Irf1	Flnb	Cntn1	BC004004	Hspa5		1110008H02Rik	Cd81	Ctsh
Itm2c	Flt1	Coasy	Baat	Hspa8		Ndufa2	Psme1	2010200I23Rik
Junb	Flywch1	Col18a1	Bag3	Hspd1		D630024B06Rik	Nfkbia	2010004P11Rik
Kazald1	Fmnl1	Col4a1	Basp1	Icam1		D7Rp2e	Btg2	Trip6
Kcna3	Fnbp1	Col4a2	Bat2	Id1		2010100O12Rik	Rsu1	Synpo
Kctd1	Fndc3a	Cox8a	Bat4	Ifng		2010100O12Rik	Crip2	Herpud1
Kifap3	Fos	Cpsf2	Bckdhb	Igf1		C530002L11Rik	Ctsl	Cast
Kremen1	Fosb	Crem	Bcl2a1a	Igf1r		Pdcd8	2500002L14Rik	Nars
Lag3	Fut7	Cryaa	Bcl3	Igf2		Anp32b	Gadd45g	Tde2
Lass4	Fut8	Crybb2	Bcl6	Igsf6		Mrpl33	Ldh2	Scotin
Lat	Fxyd5	Cs	Bcl7b	Ikzf1		Bub1	Ulk1	3110038L01Rik
Lbh	Fzd2	Csrp1	Bet1l	Il10		Lphn1	Irf1	1810045K07Rik
Lcp1	Gadd45b	Cst7	Bgn	Il1b		Vrk1	Edn1	6030448M23Rik
Limd2	Galk2	Ctla4	Birc2	Il2rg		Ect2	Gadd45b	2810432L12Rik
Litaf	Galnt11	Ctnnbl1	Blcap	Il7		0610040B21Rik	Lck	2310075G12Rik
Lmbr1l	Galnt6	Ctnnd1	Blzf1	Irf4		Stmn1	Serpina3g	2310061B02Rik
Lrrc8d	Gatad1	Ctsl	Bmi1	Itga2		Dck	Tgtp	Basp1
Lrrfip1	Gem	Cxcl14	Bmp1	Itga2b		Cdh1	B4galt6	Bgn
Lst1	Gfod1	Cxcr5	Bmp4	Itga3		Set	Rga	0610010K06Rik
Ltb4r1	Glis2	Cyb5b	Bmp7	Itga4		Dtymk	C730036B01Rik	Dnajb6
MGAT1	Gpc2	Cyp2e1	Bnc1	Itga5		Itm1	E130107N23Rik	4732477C12Rik
MYH9	Gpr56	D330045A20Rik	Bpgm	Itga9		1110018B13Rik	Cyp4b1	Lrp10
Maff	Gpr97	Dag1	Brap	Itgal		Tram1	Ercc5	Rab11a
Man2a2	Gpsm1	Dapk1	Brca2	Itgam		Ppp2r5c	Ablim1	Bnip3l
Man2b1	Gramd1a	Dbt	Brd4	Itgav		Adsl	Isgf3g	1110020C13Rik
Map4	Grn	Dcbld1	Btbd1	Itgb1		Skd3	Wwp2	2900097C17Rik
Map4k4	H2afy	Dctd	Btg3	Itgb2		Cfl1	2610311I19Rik	2510039O18Rik
Map7d1	Haao	Dctn3	Bysl	Itgb3		Mas1	Atp11a	B230114J08Rik
Mapk12	Hes6	Dcun1d4	C1r	Itpr1		Mki67	2210023G05Rik	2610019N13Rik
Mfge8	Hist1h1e	Ddit4	C330007P06Rik	Jag1		Socs2	Zfp275	Sat1
Mgat5	Hist1h2bj	Ddx18	C80913	Jak2		Pla2g4a	1810009A16Rik	Lmo2
Midn	Hist1h4d	Ddx51	Cad	Jam3		Hint	Srcasm	Prkar1a
Milr1	Hmces	Dhodh	Caml	Junb		Cox6a1	Pik4ca	D6Ertd772e
Mkl1	Hmga2	Dhx9	Capn5	Kdm3a		1110025H10Rik	Mtmr13	Stab1
Mpnd	Homer3	Dicer1	Car4	Kdr		Cox7c	3830408P06Rik	Ctla2a
Mrgpre	Hvcn1	Dimt1	Cars	Kit		6230416J20Rik	Gbp2	Mlp
Myadm	Icam1	Diras2	Casp12	Kitl		Tmem4	AW538430	3230401N03Rik
Mycn	Idh2	Dlg3	Casp14	Lef1		2510027N19Rik	Rpl44	Cd164
Myl6b	Ier2	Dll1	Casp3	Ly6c1		Cyba	Aldo1	Ctsf
Myo1f	Ier3	Dmkn	Casp4	Ly86		2510005D08Rik	Ccng1	AW050020
Naga	Igf1r	Dnajb9	Cbr1	Mad1l1		Ndufb9	1110058B13Rik	Gnb1
Naglu	Igf2bp3	Dnmt3a	Ccdc53	Mapk14		Ppic	Bysl	Ccnd2
Napsa	Igfbp4	Dnmt3b	Ccdc90b	Mcl1		2810417H13Rik	Srp19	Dusp16
Nbeal2	Igfbp6	Dnpep	Ccl27	Mef2c		Cdc2a	Trappc4	4930504E06Rik
Ncf1	Ikzf2	Dntt	Ccnd1	Meis1		Mcm5	Suclg2	LOC212111
Ncoa4	Il12rb2	Dpagt1	Ccnl2	Met		Prdx2	Dr1	Plekhb2
Nfil3	Il4ra	Dph5	Ccs	Mitf		4921531G14Rik	Tubb3	Gabbr1
Nfkbie	Impa2	Dpt	Cd151	Mmp13		Rad50	Rpl18	Blcap
Nkg7	Inpp1	Dusp12	Cd1d1	Mmp3		Uchl5	Creg	Copeb
Nlgn2	Irf1	Dusp9	Cd27	Mmp9		D11Ertd99e	Timp3	Cd14
Nol4l	Isoc2a	Dydc1	Cd320	Mpl		2410041A17Rik	1110067D22Rik	Nfkb1
Nrgn	Itga6	Dynlrb1	Cd59a	Mpo		Brd7	4833420N02Rik	Dnajb10
Nsmaf	Itgae	Dyrk4	Cd80	Msn		Cox6c	Usp49	Rab6
Padi2	Itgb3	ECEL1	Cd81	Myb		Abce1	1500011H22Rik	Wsb1
Palm	Itm2c	Ears2	Cd83	Myc		Anxa2	D14Ertd436e	Mail
Paox	Jun	Echdc3	Cd96	Myl4		Pafah1b3	2700010L10Rik	Nr1d2
Paqr7	Junb	Efna1	Cdadc1	Nanog		Snrpd1	Abt1	Tieg1
Parp16	Kazald1	Eif3d	Cdc2l1	Nedd4		Psme2	Igtp	Ss18
Pdgfrb	Kcna3	Elavl4	Cdc42ep4	Nfkb2		Ghitm	AI842353	Aldh1a1
Pecam1	Kctd1	Elp3	Cdh3	Ngfr		Rrm1	4921526G09Rik	Ppp1cb
Peli1	Kif21b	Emcn	Cdk2ap1	Notch1		Slc25a5	D4Ertd89e	Rbm14
Phf13	Kremen1	Emid1	Cdkn1a	Notch4		Ndufc1	Ipo4	Tde1
Phlda1	Ksr1	En2	Cdkn1c	Nr4a2		2810484M10Rik	Gadd45b	Tapbp
Pigx	Lass6	Enah	Cebpb	Numb		Psma2	Cyp4b1	2700007P21Rik
Pik3cd	Lat	Enpep	Cenpb	Pafah1b3		Itgb1bp1	Ubc	Tuba1
Pim1	Lat2	Enpp1	Cenpc1	Pbx1		Ssr2	Daf2	Stx3
Pkn3	Lbh	Epb4.1l4b	Cep250	Pcgf2		Pcna	Wig1	Wbp5
Plaur	Ldlrad4	Epha3	Chad	Pdk2		2010005E08Rik	Grcb	5730403B10Rik
Plcg1	Limd2	Ereg	Chchd2	Pdk4		Hs1bp1	Ltc4s	H3f3b
Plekhf1	Litaf	Erp29	Chchd6	Pfkl		BC028768	Irf6	H2-Ab1
Plekho1	Lmbr1l	Esam1	Chd1	Pgk1		Banf1	D530037H12Rik	Oaz2
Plod1	Lrp12	Esr1	Chek2	Phc1		Ppia	Pvt1	Itm2b
Plxnd1	Lrrc1	Etv1	Chka	Phc2		Ran	M6pr	Stat1
Poln	Lrrc8d	Etv4	Chkb	Pkm2		Nudt14	H2-Aa	Bmi1
Ppm1f	Lrrfip1	F2rl1	Chrnb1	Postn		Frda	1200016B17Rik	1810010A06Rik
Ppp1r13b	MGAT1	F2rl3	Ciao1	Pou2af1		Rnf5	Mpl	Pgrmc1
Ppp3cc	MYH9	F7	Clca1	Pparg		1110033L15Rik	Gabarapl1	H2-T17
Prkag2	Maff	FOXP3	Clcn3	Ppp2r4		Psmb10	Rex3	H2-D1
Prkca	Malt1	Fabp9	Clk1	Prdm16		Snrpa1	Drpla	Nfix
Prpsap2	Mamdc2	Fads2	Clk4	Prl2c2		Birc5	1190003P12Rik	Hspa5
Ptms	Man2a2	Fam209	Cln8	Ptch1		Ndufb10	Bcap31	Ctsl
Ptpn22	Map3k3	Fam73a	Cmas	Ptgs2		Psmb5	Scp2	2500002L14Rik
Pxylp1	Map3k5	Fbxo21	Cmip	Pth		Hsp70-4	Ctgf	Ldh2
Rab19	Map4	Fbxo43	Cmtm8	Pth1r		Srp9	Ninj1	Casp1
Rab21	Map7d1	Fbxw11	Cnot7	Pthlh		Cox7b	Zfp36l1	Gadd45a
Ralb	Mapk11	Fdx1	Cnpy2	Rb1		Npm1	Rab24	Ulk1
Ralgds	Mapk12	Fezf2	Col4a1	Rbbp9		Rpl27a	Bax	2610209L14Rik
Rap2a	Marcksl1	Fgf15	Col4a2	Rbl2		Arfrp1	Gstm1	Kdt1
Rara	Mc5r	Fgf3	Comt	Reln		Dnajc2	8430421I07Rik	Serpina3g
Rasa3	Mdga1	Fgf8	Comtd1	Rnf2		H2afz	1500001L15Rik	Casp4
Rassf2	Mfge8	Filip1	Cops4	Rps6kb1		Tkt	Rnf4	Tgtp
Rcsd1	Mgat5	Fkbp11	Cops7a	Rspo2		Psmb6	Sin3b	Rga
Rdm1	Mical1	Fkbp3	Coq9	Runx1		Rrm2	Fuca	Madh1
Rgs1	Midn	Fkbp7	Cox17	Runx2		Mrpl13	Psmd12	Efna1
Rgs14	Mkl1	Flnb	Cox7b	Sbds		1110007A04Rik	Cd8b	Tap1
Rgs2	Mpo	Flt3	Cpxm1	Selp		Rps12	Trim11	Gbp3
Rhob	Mrgpre	Fmr1	Cr1l	Sfpi1		2810432D09Rik	Rps19	Cyp4b1
Rhoq	Mtap7	Foxb2	Cradd	Sfrp1		Nucb2	Polr2g	Ptger4
Rin3	Mxd4	Foxc2	Crem	Sfrp2		Lsm8	Ets2	Gabpa
Rnf13	Myadm	Fpgs	Crlf3	Sh2b3		AW541137	Rabac1	BC025546
Rps6ka5	Mycn	Frap1	Crtap	Shh		Blm	Krt1-18	Pura
Rras	Myl6b	Fut7	Cryz	Sin3a		Psmb8	6720465F12Rik	Isgf3g
Rras2	Mylip	Fyttd1	Csnk2b	Slc2a1		Rasl2-9	H2-Eb1	9230112N11Rik
Runx1	Naga	Fzd6	Csrp2	Slit2		Sell	D13Wsu50e	1110017N23Rik
S100a6	Nbeal2	G6pc	Cstb	Smad2		Cspg6	Dctn3	Atp11a
STAT3	Ncf1	G6pc3	Cstf1	Smad3		Psmc3ip	Cyp1a1	Sec61a2
Samd10	Ncoa3	Gaa	Ctdsp2	Smad7		Guca1a	F8	8430420C20Rik
Satb1	Ncoa4	Gabpa	Ctf1	Sod2		Cd48	Xbp1	Ubl4
Sdf2l1	Ndrg1	Gabrb1	Ctla2a	Sp1		Psmd10	Tubb2	2310075E07Rik
Selm	Nedd4l	Gadd45b	Ctla2b	Sp7		Crcp	Cdkn1a	Atf3
Sema4d	Nek6	Galk2	Ctsf	Spib		Lgals9	Eif2ak4	E130103E02Rik
Sema6b	Nfil3	Gart	Cttn	Spp1		Rfc4	Deb1	Gbp2
Sh2b1	Nlgn2	Gatm	Cuta	Stat5a		BC003479	5730409F23Rik	Rbbp9
Sh2b2	Nol4l	Gatsl2	Cux1	Stat5b		Mns1	Tor1b	LOC224598
Sh2d1b1	Npc1	Gba	Cx3cl1	Tal1		Cte1	Nckap1	AW538430
Sh3bgrl3	Npc2	Gdap1	Cxxc5	Tdgf1		Dhx9	Arhd	Ifi47
Sh3bp2	Nphp1	Gimap7	Cyhr1	Tek		Rgs19	9430009J09Rik	Odc
Slc12a7	Nr2f6	Gins4	Cyp2c29	Tgfb2		2810431B21Rik	1200009C21Rik	Ifrd1
Slc25a24	Nrros	Gje1	Cyp2f2	Tgfbr2		1810044O22Rik	1200015A19Rik	1190006E07Rik
Slc26a11	Nsmaf	Gla	Cyp7b1	Thbs2		Nsbp1	C230056F04Rik	Ccng1
Slc2a6	Numbl	Gna15	D10Wsu102e	Thpo		Htatip2	Aldh2	Mxi1
Slc36a1	Nxn	Gpatch4	D13Ertd332e	Thy1		Dhodh	Btg3	Hnrpc
Slc39a6	Osbpl5	Gpr124	D15Ertd55e	Timp3		Nbn	BC017133	Rnf11
Slc44a2	P2rx3	Gpr39	D16H22S680E	Tjp1		1110013G13Rik	Pik3r1	9630044O09Rik
Slc9a5	Padi2	Gpr97	D19Bwg1357e	Tlr4		1500019O16Rik	Ndrl	1110003E01Rik
Slco3a1	Palm	Gprc5b	D4Wsu114e	Tnc		2610509I15Rik	4933426M11Rik	Wsb2
Slco4a1	Pank1	Gpx5	D6Wsu176e	Tnfrsf1a		Slc35b1	Maged1	Msn
Smad4	Panx1	Gpx7	Dad1	Tnfrsf1b		1300006N24Rik	DXImx38e	1100001D10Rik
Smad7	Paqr7	Grhpr	Dag1	Tnfsf11		Grpel1	Icam1	Sdpr
Smim3	Parp16	Grlf1	Dbp	Tnik		1110049G11Rik	Iigp	Selk
Snx30	Parp8	Gstm1	Dci	Tnn		1110049G11Rik	0610013D04Rik	2310004K06Rik
Soat1	Pdcd1lg2	Gstm4	Dclre1a	Tpi1		Pdap1	Ak1	Ndr1
Socs3	Pecam1	Gtf2a1l	Dctn1	Trem1		Arl3	Pdir	Cd63
Sox4	Peli1	Gtf2ird2	Dctn2	Trp53		Tcof1	Laptm4a	Creg
Sptan1	Perp	Gtf3a	Dctn6	Uhrf2		Nans	Carhsp1	Timp3
Srpk2	Pfkfb3	Gtf3c6	Dda1	Usf1		Lrpprc	1300002A08Rik	Yap
Ssh3	Pgm2	Guca2a	Ddit3	Vasn		Mrps25	2700030M23Rik	Ghitm
St6gal1	Phf13	Guf1	Ddit4	Vcam1		2700061N24Rik	Copg1	Cyp4v3
Susd3	Phf21a	Gzmb	Ddt	Vcan		0610038P07Rik	Ywhaq	AW146242
THEA	Phlda1	H2-DMa	Ddx17	Vdac1		Ipo11	1700007D05Rik	Usp49
Tbc1d16	Pigx	H2afv	Ddx39	Vegfa		2410018G20Rik	1600025H15Rik	D14Ertd436e
Tcf7	Pik3ap1	H3f3a	Ddx3y	Vhl		Ckap2	Coxvib2	Igtp
Tec	Pim1	Habp4	Ddx51	Wif1		4921516M08Rik	1300006C06Rik	Sytl4
Tes	Pim2	Hand1	Decr1	Wnt1		Slc35a1	Ifi1	AA536730
Tesk1	Pkn3	Hemt1	Dgat1	Wnt3a		Anp32a	Serpine2	Gadd45b
Tgfbr1	Plau	Hes2	Dgcr2	Wnt5a		2810047L02Rik	Hsd17b4	Cyp4b1
Tgif1	Plcg1	Hexa	Dlg3	Wnt7b		Rbl1	H2-D1	Grcb
Thsd1	Plcg2	Hey1	Dll3	Wnt9a		Prtn3	Cfl2	Irf6
Tirap	Plekhf1	Hic1	Dmap1	Zmat3		Mrpl46	Ctla4	Vcam1
Tjp2	Plekhg3	Hint2	Dnaja2			Cetn2	Dlst	Lrrfip1
Tle6	Plekho1	Hira	Dnajb2			Zrf2	Sgk	Ssb
Tm6sf1	Plod1	Hmg20a	Dnajb3			1500015J03Rik	1110007A06Rik	Glud
Tmem119	Plxnd1	Hmgxb3	Dnajb4			Nola1	Tal1	Stxbp3
Tmem180	Pmaip1	Hn1	Dnajb6			Mtx2	Ywhab	D530037H12Rik
Tmem50b	Pnrc1	Hoxa10	Dnajc1			Hprt	Phlda3	M6pr
Tmem86b	Ppm1f	Hoxa2	Dnm1l			D11Ertd497e	Cdkn1a	Sui1-rs1
Tmsb10	Ppp1r13b	Hoxa3	Dock7			Map2k1ip1	Gtpi	H2-Aa
Tnfaip8l2	Ppp1r14c	Hoxa5	Dok2			D16Ertd502e	H2-T23	Mpl
Tnrc18	Ppp3cc	Hoxa9	Dph5			Psmc1	1110030N17Rik	Gabarapl1
Tns3	Prkacb	Hoxb4	Dpm2			Ubc-rs2	Prpf8	Sdcbp
Tpm4	Prkag2	Hoxc8	Dpm3			Hirip5	S100a11	Rex3
Tpst2	Prkca	Hoxd10	Dtd1			5730551F12Rik	1200015A22Rik	1190003P12Rik
Trerf1	Prpsap2	Hpn	Dtx2			5330419I01Rik	Napa	Sdfr1
Tsen34	Psmb9	Hsd11b2	Dtymk			1700003F10Rik	Ier2	App
Tspan14	Pstpip1	Hsd17b10	Dusp1			2310056P07Rik	Slc3a2	B2m
Tspan2	Ptms	Hsd3b7	Dusp12			Gtf2b	1810020D17Rik	2210023F24Rik
Tuba1a	Ptpn18	Hsf2bp	Dusp2			5033425B17Rik	Gnb2-rs1	Rcn2
Tuba8	Ptpre	Hspa1l	Dusp9			Ube2v2	E030024M05Rik	Dusp6
Txndc12	Pvr	Hspb1	Dvl1			1110020J08Rik	Tob1	Osbpl1a
Tyrobp	Pxylp1	Ifi44	Dync1h1			Mtch2	Kitl	Zfp36l1
Uap1l1	Rab21	Ift22	Dync1i1			1110064N10Rik	Ei24	Itm2a
Usp22	Rab27a	Ift81	E130116L18Rik			2700038L12Rik	Trpc6	Gstm1
Usp28	Ralb	Igbp1	E2f5			MGC36453	Upp1	Gtl3
Vim	Ralgds	Ighmbp2	E4f1			Rwdd1	Supt5h	Abcg2
W18623	Ralgps2	Il11ra	Ebi3			2010317E03Rik	Eng	Mtap7
Wsb1	Ramp1	Il12rb1	Edf1			Rpa3	Lamp2	Fkbp9
Xpc	Rap2a	Il1f6	Efna1			Npc2	Cd59b	H2-T10
Zc3h12a	Rapgef3	Il1f8	Efnb2			2017-09-15	Gp49a	Hnrpk
Zdhhc20	Rapsn	Ildr1	Egr1			Pdcd2	Saa2	Atp6ap1
Zfand5	Rara	Ilvbl	Eif2ak4			Fkbp3	Tyrobp	Prg
Zfp36	Rasa3	Impa2	Eif3d			Rpo1-1	Ppox	Rabac1
Zfp422	Rasgrp4	Ing5	Eif3k			Mrpl12	Trim25	Krt1-18
Znrf1	Rassf2	Inhbe	Eif4a2			2010319C14Rik	Ezh1	Npl
Zscan2	Rassf5	Ipo4	Eif4ebp1			1100001J08Rik	Ap2a2	Tfpi2
Zyx	Rcbtb2	Irak1	Elf1			Ywhae	Prnp	Ier3
	Rcsd1	Irgm1	Ell			Fbl	Cenpa	1810010L20Rik
	Reps1	Irx2	Elovl3			Grcc2f	Sara	Peli1
	Rgs14	Isyna1	Elp2			Hras1	Vcp	1500001M02Rik
	Rgs19	Jam2	Emcn			Cdk4	1810058I24Rik	Bpgm
	Rgs2	Jam3	Eng			Snx3	Tnni3	Serpinh1
	Rhob	Kazald1	Eno2			Magoh	Zfp282	Xbp1
	Rhoq	Kcnd3	Enpp1			Vdac3	Ccl27	Hnrph2
	Rhou	Kcne4	Epb4.1l4b			1810020G14Rik	Bcl2l11	Tubb2
	Rin3	Kcnmb1	Epc1			2310008M10Rik	Ifnar2	Nucb
	Rnf13	Kdelr2	Ercc2			2810470K21Rik	1810060K07Rik	Cdkn1a
	Rnf130	Kdm2b	Ercc5			Mrps22	Lrp1	Cxcl1
	Rnpep	Khdrbs3	Ergic1			2310057G13Rik	Nxf1	9130022A11Rik
	Rps6ka3	Kif21a	Errfi1			1110001A16Rik	Il18r1	Pdcd6
	Rps6ka5	Kif3a	Esf1			Decr1	Ppnr	Tor1b
	Rras	Kifap3	Etohd2			1500001M20Rik	2410019G02Rik	Nckap1
	Rras2	Klf10	Ext2			Pole3	Itpr5	Zfp68
	Rtn4r	Klf17	Eya2			Mpdu1	Tpd52l1	Rbl2
	Runx1	Klf4	Ezh1			Pts	Trim41	1200015A19Rik
	Runx2	Klhl30	F11r			Ubl4	Gja5	2310050K10Rik
	S100a6	Klhl5	F13a1			2310008H09Rik	Lrmp	Btg3
	STAT3	Klk3	F2r			Bcap29	Ppm1b	Pdcd6ip
	Samd10	Kndc1	F2rl2			1700097N02Rik	Pipox	Itm2c
	Satb1	Krr1	F2rl3			1110046L09Rik	Xlr4	Gcipip
	Sbk1	Krt10	Fabp5			Apoa1bp	Rora	Ndrl
	Scin	Krt18	Fads1			Cst3	Tceb3	4933426M11Rik
	Sdf2l1	Krtcap2	Fancc			1110049G11Rik	Nakap95	Morf4l2
	Sema4c	Lactb	Fasn			Prps1	Ncoa3	Dnajb9
	Sema4d	Lage3	Fastk			D4Ertd786e	Pdpk1	2610318G18Rik
	Sepn1	Lamc1	Fbp1			D19Wsu55e	Per3	Maged1
	Sertad1	Laptm4b	Fbxo3			1500001M20Rik	Gfi1b	DXImx38e
	Sfpi1	Lass4	Fbxo6			1810004D07Rik	1300004C08Rik	9430020K16Rik
	Sh2b1	Lbp	Fbxo8			BC038311	Gch	Icam1
	Sh2b2	Lcat	Fbxo9			Srm	Arntl	Iigp
	Sh2d3c	Ldhd	Fbxw5			Hip2	Il1r2	Laptm4a
	Sh3bgrl3	Leng8	Fcf1			1110005A23Rik	Plaur	2700030M23Rik
	Sh3bp2	Lingo3	Fcho1			3110001M13Rik	Ccnl2	0610038L10Rik
	Sigirr	Lmf1	Fdx1			Scye1	Gpr56	Ifi1
	Slc12a7	Lrfn5	Fech			Psph	Pps	Mcfd2
	Slc24a3	Lrp12	Fem1b			Cacybp	4921518A06Rik	H2-D1
	Slc2a6	Lrrc34	Fgf3			AI837181	Nmt1	Cfl2
	Slc39a6	Ltbr	Fgf7			Nme2	H2-Ke6	Perp
	Slc45a3	Lxn	Fgfr1			Hdgf	Bcl6	Pfkp
	Slc7a8	Ly6e	Fgfr2			Sec61g	C4	Sgk
	Slco3a1	MRPS30	Fhl1			Mrpl23	Expi	1110007A06Rik
	Smad1	Maff	Fkbp10			S100a6	Samhd1	Fgl2
	Smad4	Mamdc2	Fkbp11			Cetn3	Csf2rb2	Rnf103
	Smad5	Map1a	Fkbp1a			Atp5c1	Slc10a3	Tal1
	Smad7	Map2k7	Fkbp3			Atp5c1	2310010M10Rik	Cdkn1a
	Smim3	Map4k2	Fkbp7			Atp5c1	Fln29	Gtpi
	Smpd2	Mapk11	Fkbp9			Nme6	Gfi1	H2-T23
	Snn	Mapk13	Fkbpl			Gdap3	D13Ertd275e	Ppap2a
	Snx30	Mast2	Flt3			Hspe1	AU043488	Rasd1
	Soat1	Mcee	Flt3l			Sfxn1	AI325941	Ier2
	Socs3	Mcm3	Fnbp4			Cops7a	Skiv2l	Slc3a2
	Sox13	Mecom	Fnta			Ndufs4	Cd1d1	E030024M05Rik
	Sox4	Mef2c	Fos			Lsm4	Aim1	Tob1
	Spata13	Mef2d	Fosb			Atp5l	Ssbp2	Tieg1
	Sptan1	Met	Foxa3			Idh3g	Ctla2b	Klf4
	Sptbn1	Mettl16	Frap1			Mcm4	2610019E17Rik	Ak4
	St3gal2	Mfn2	Frat1			Bzrp	6130401J04Rik	Shrm
	St6gal1	Midn	Fshb			Mrpl39	Dgka	S100a13
	Stx3	Mlc1	Fstl1			Ly6a	Lancl1	Ifnar2
	Susd3	Mlec	Furin			Slc25a4	2410141M05Rik	0610010E21Rik
	TGFB1	Mlxipl	Fut8			Psmb9	Wbscr5	5830406C15Rik
	THEA	Mmp12	Fxyd5			Hmgb1	2010305K11Rik	5830413E08Rik
	Tax1bp3	Mmp23	Gaa			Nedd4	1110020K19Rik	Nfkbia
	Tbc1d10c	Mmp7	Gab1			Mcm2	Clca1	1200008D14Rik
	Tbc1d16	Mogs	Gabarapl1			Hnrpa2b1	Slc31a1	Csrp1
	Tbc1d7	Mpl	Gabbr1			4432411H13Rik	AW538196	1190002H23Rik
	Tbkbp1	Mpp6	Galk1			3230402J05Rik	6030410I24Rik	Nptxr
	Tcf7	Mprip	Galnt3			Tyms	AW549877	Il11ra2
	Tec	Mpzl1	Galt			Tyms	A830054M12	Pls3
	Tes	Mrpl16	Gas2			Nipsnap1	Cars	Ccni
	Tesk1	Mrpl45	Gas5			Hmbs	2700088M22Rik	Fbxo8
	Tgfbr1	Mrps18c	Gata1			Hspd1	Gtpbp2	1190017B18Rik
	Tgif1	Mrps26	Gata2			Pnp	2810008P14Rik	D9Wsu18e
	Thap3	Msh2	Gata3			Plp2	Vnn1	S100a1
	Tirap	Mstn	Gata6			1110014C03Rik	Nppb	Cd9
	Tjp2	Mta2	Gbas			Prdx4	0610012A05Rik	Ppp1r2
	Tle6	Mthfd1	Gbp2			Adk	1110015E22Rik	Serpinb6a
	Tmem176a	Muc1	Gcat			Nedd8	Pcbp2	2410022L05Rik
	Tmem176b	Muc13	Gch1			Ndufa8	Pscdbp	6330514M23Rik
	Tmem50b	Mus81	Gclm			1500011L16Rik	Pscdbp	Fhl1
	Tmsb10	Mvd	Gcsh			1810004D07Rik	9330177P20Rik	Lmo4
	Tmsb4x	Mybbp1a	Gfer			Pter	Hmgcr	Capza2
	Tnfrsf21	Mycbp2	Gfpt2			Sec61b	1300013G12Rik	Skp1a
	Tnfsf12	Mycl1	Ghr			Tm4sf7	Masp2	Nfix
	Tnni1	Mycn	Gimap1			Apex1	Mbd1	5031439A09Rik
	Tnrc18	Myo10	Gja1			Acyp1	Mapkapk5	Actb
	Tns3	Myom1	Gjb3			Ndufb3	Dgat1	Shyc
	Tob1	Mzt1	Gkap1			5830427H10Rik	Ccl9	Lcp2
	Tpd52	Naa38	Glb1			Ndufb8	Cipp	Map3k1
	Tpm4	Nap1l3	Glul			Coq7	Hdac6	Hoxa5
	Tpst2	Ncoa6	Glycam1			Emp3	Pim1	Vig1
	Trip10	Ndrg2	Gnaq			Atp5e	Etohd2	Atp6v1c1
	Trp53bp2	Ndufa12	Gnb1			Psmc3	5730453I16Rik	Ndfip2
	Tsen34	Ndufb2	Gnb5			Psmc3	LOC227619	LOC269796
	Tspan14	Nek6	Gng11			5730449L18Rik	AA407558	3100002M17Rik
	Tspan2	Nfatc2	Gngt2			Ech1	Selp	Pftk1
	Tspan5	Nfe2l3	Gorasp1			Grim19	Bhlhb2	Fzd4
	Ttyh2	Nfkbie	Gpd2			Them2	AA959601	Snx10
	Ttyh3	Ngfrap1	Gpn1			Cfdp	9530098M12Rik	2610205H19Rik
	Tuba1a	Nhlh1	Gpr177			Mrpl18	Mgst2	F2r
	Tuba8	Nkg7	Gpr65			Mrpl18	Arl6ip2	Dhx36
	Tulp4	Nlrp4	Grb10			Clns1a	Fmo5	Sypl
	Twf2	Nppc	Grhpr			0610041L09Rik	Lgals4	Zfp161
	Twist1	Npy5r	Grik5			Cox7a2	Tbce	4733401O11Rik
	Txndc12	Nr0b1	Gspt2			Hist1h2bc	1200009B18Rik	Rgs2
	Uap1l1	Nr1i3	Gsta4			2700038C09Rik	0610041O14Rik	AA536743
	Ube2w	Nr4a1	Gstk1			2810417H13Rik	Sfrs6	Casp3
	Ubtd1	Nr4a2	Gstm1			Ipo7	Zfp110	Brd1
	Ugdh	Nsg1	Gstm5			Atpi	1500036F01Rik	Ccng2
	Unc13a	Nt5c3l	Gsto1			Psma7	2410005K20Rik	Myo5a
	Usp22	Nt5dc3	Gstt1			Mor1	Map1lc3	Socs2
	Usp28	Ntrk3	Gstz1			Lman2	4930555L11Rik	Slc12a2
	Vim	Nub1	Gtf2i			Snrpg	D930014A20Rik	Ptp4a2
	Vps37c	Nufip1	Guca1a			2510048O06Rik	0610013I17Rik	Man1a
	Wsb1	Nup35	Guca2a			Psmb3	2410017I18Rik	Prkcn
	Xpc	Ocln	H1f0			Apoa1bp	2310057H16Rik	Scamp1
	Xpo7	Opn3	H2-DMa			Smfn	Ahr	Ube2e1
	Ybx2	Or2ag1	H2-Eb1			Erh	BC017643	S100a6
	Zdhhc20	Oxct1	H2-Ke2			Ndufv2	Tmc6	Ly6a
	Zfand5	P2rx6	H2-Ke6			Grcc10	Prkcd	Anxa5
	Zfp36	P2rx7	H2-M10.1			Timm9	Plod3	Cpt1a
	Zfp422	Pafah2	H2-M2			Eif2s3x	Abr	Csrp2
	Zfp521	Pank1	H2-T10			Psmb7	Unc93b	D12Ertd647e
	Zfp579	Paox	H2-T22			Urod	Ldlr	D0Jmb3
	Zmiz1	Papl	Hapln1			Hsd17b12	1110032C13Rik	Wtap
	Znrf1	Pard3b	Has2			Mtx1	Bcl2l2	Nab1
	Znrf2	Pard6g	Hcn3			Lcp1	AA793972	Acadl
	Zyx	Parm1	Hdac5			Ccnb2	Arhgef5	1110001M20Rik
		Parva	Hddc2			Snrp1c	5730420B22Rik	Hey1
		Pcdh1	Hebp1			D630012G11Rik	Adam22	Slc25a20
		Pcmtd1	Hes1			2700029M09Rik	2310061O04Rik	4930415K17Rik
		Pcp4	Hey1			Nudt1	Smarcd2	2310075C12Rik
		Pdcd4	Hgfac			Rras	Cpeb2	Qscn6
		Pde1a	Hint2			Lsm3	A130052D22	0610011I04Rik
		Pde4b	Hist1h1a			Farsl	1110017P05Rik	Erbb3
		Pdgfrb	Hist1h2bc			Cpsf5	LOC214424	Spp1
		Pdia5	Hist2h2aa1			D10Ertd214e	Esr1	Cd151
		Pdrg1	Hk1			Gtf3a	Lpin2	2410018G23Rik
		Pex11a	Hk2			Tubb5	5730589K01Rik	2410018G23Rik
		Pfdn1	Hlx			Psma5	D1Ertd161e	H2-Q1
		Pfkfb3	Hmox2			Dncl2a	Sema4a	H2-K
		Pglyrp2	Homer3			2310075M17Rik	Riok3	Klf3
		Pgrmc1	Hoxa10			Mea1	Ndr2	Upp1
		Phc1	Hoxa5			Gpx4	1110001M20Rik	Sp1
		Phkg1	Hoxa6			1110001J03Rik	Il1r2	Eng
		Phlpp	Hoxa7			Mrps21	Hspa4	Lamp2
		Piezo1	Hoxa9			1810055D05Rik	D5Wsu46e	Wdr26
		Pitpnm2	Hras1			1810045K17Rik	Rnf19	Trim25
		Pkd2	Hrsp12			BC008155	Zfp259	Gna13
		Pkp1	Hs1bp3			Akr1c13	Wbscr5	Wbp5
		Plac8l1	Hs2st1			C030002N13Rik	Bag3	Iqgap1
		Plekha3	Htf9c			0610012D09Rik	Ihpk1	Prnp
		Pln	Htr7			Snrpd2	Usp49	Sara
		Plscr4	Htt			1110035L05Rik	Notch1	1700056O17Rik
		Pnpla6	Huwe1			Sdhb	Socs3	Ccl27
		Polr2e	Icam1			Bcas2	6330407G11Rik	Bcl2l11
		Pp11r	Id1			Acaa2	Zp2	Edr1
		Ppa1	Id3			Mrpl2	Ccrn4l	Nxf1
		Ppap2c	Idua			Sec13r	2610007K22Rik	Il18r1
		Ppfibp1	Ier2			2010110M21Rik	Tpd52	Ppnr
		Ppfibp2	Ifi203			Ndufb2	C1qdc1	BC023892
		Ppic	Ifi35			2310003F16Rik	Socs3	Itpr5
		Ppif	Ifi47			6030432N09Rik	1810007M14Rik	Tgif
		Ppil4	Ifih1			Echs1	Mnt	Phxr4
		Ppp1r11	Ifit1			Timm23	2010301N04Rik	Ppm1b
		Ppp1r14b	Ifitm3			Psmc2	Taf1a	Sp100
		Ppp2r2b	Ifnar1			Cops5	Ndst2	Xlr4
		Prdm1	Ifnar2			Uqcrb	D4Wsu53e	Fez2
		Prdx1	Ifngr1			1110036E10Rik	Hspa4	Clk4
		Prkacb	Ifrd1			D11Wsu68e	Dpp4	Tceb3
		Prkcdbp	Igbp1			Hadhsc	2810457M08Rik	Nakap95
		Prkdc	Igtp			Park7	Irf4	4833420G17Rik
		Prl	Iigp1			1110005A05Rik	Dusp2	Cyfip2
		Procr	Iigp2			Mrps15	Tgfbi	Cd28
		Prpsap1	Ikbke			1700013H19Rik	F7	1300004C08Rik
		Prr16	Il11ra2			Alg5	Ptprj	Gch
		Prss12	Il12rb1			Golph2	Sp4	Adcy6
		Prtn3	Il15			Nsap1l	5730497N03Rik	Ugdh
		Pskh1	Il16			2310016E22Rik	5730497N03Rik	Mthfr
		Psma8	Il18			0610010K14Rik	Btg1	Igj
		Psmb10	Il1r1			0610010K14Rik	Adrb2	Facl4
		Psmb4	Il3ra			0610010K14Rik	Clk	Dnajc3
		Ptf1a	Il4ra			Phf5a	Clk3	Dnajc3
		Ptgds	Il6ra			Clic1	Map2k3	Tle1
		Ptger3	Impact			D13Wsu177e	Rasa3	Il1r2
		Ptov1	Inadl			0610025L15Rik	Ifi203	Plaur
		Ptpn14	Ing4			0610009C03Rik	Mdm4	Birc3
		Ptpn20	Inpp5b			1110030L07Rik	Abcb1b	Sc5d
		Ptpn21	Invs			Idh2	4930564D15Rik	4833420O05Rik
		Ptpn5	Ipo4			Txnl2	Pscd2	Ccnl2
		Ptrf	Irak1			Ndufb7	Ube2b	Gpr56
		Pxt1	Irf3			2900010M23Rik	Srrm1	Cxcr4
		Pygm	Irf6			0610009D07Rik	Sps2	Pps
		Qsox1	Irf7			Usmg5	Slc12a3	Atp7a
		Rabggta	Irf9			1110011K10Rik	E430019N21Rik	5430432P15Rik
		Rad18	Isca1			Sf3a3	Smarca5	9130422G05Rik
		Rag1ap1	Isca2			Rbm3	Rab23	Bcl6
		Ramp3	Itga3			Hrsp12	Calm4	Tm7sf1
		Rasd1	Itga6			Acp1	Litaf	Pdcd4
		Rbbp6	Itgb1			Tk1	Mef2a	Rab33b
		Rbm19	Itm2a			4931406C07Rik	Il1r1	Csf2rb2
		Rbm34	Itm2c			ORF11	Ddx6	Eps8
		Rbmx	Itsn1			Etfa	1300002F13Rik	Fln29
		Rbx1	Jag2			2010012D11Rik	D230016N13Rik	Ly75
		Rcn2	Jagn1			Ndufv1	BC019943	B230364F10
		Rdm1	Jak2			Suclg1	Azi2	Tank
		Reg1b	Jak3			Stoml2	3100004P22Rik	Pitpnm
		Reg3a	Jun			2410015N17Rik	Timm13a	Cd1d1
		Ret	Junb			Cdc20	Gng5	Aim1
		Rfpl4a	Jup			Ndufa9	Gdap10	9130009C22Rik
		Rftn1	Kcnab3			Gatm	Ifi205	Ptk2b
		Rhobtb1	Kcnma1			Sdbcag84	Nisch	4432405K22Rik
		Ripk3	Kcnn4			1110021D01Rik	Raf1	Ctla2b
		Ripk4	Kcns1			2900055D03Rik	2310042E05Rik	ero1-beta
		Rit2	Keap1			0610011I04Rik	Stat6	5830471E12Rik
		Rnaseh1	Kif2a			5730536A07Rik	Jmj	Dgka
		Rnf151	Kifap3			Ebp	1200014O24Rik	2410141M05Rik
		Ropn1	Kit			5730469M10Rik	Csnk2a2	Eif2s3y
		Rpl10	Klc4			Mrpl28	Hbs1l	Mcoln2
		Rprm	Klf10			Timm17b	C79248	Rest
		Rps20	Klf3			Gstk1	Zfp288	2500002E12Rik
		Rps24	Klf9			Dhrs4	Ogt	Clca1
		Rps4x	Klk1b8			Hrmt1l2	BC005537	Ddx3y
		Rps6ka4	Kras			Hmgn1	Rhoip3	Ell2
		Rrp1	Krt18			Rap1gds1	Tnfrsf1b	Ell2
		Rrp1b	Krt8			Synj2bp	Pdgfa	AW549877
		Rs1	Ksr1			Skiip	Cd53	1500005G05Rik
		Rsl1d1	Ktn1			Cbx1	1810030A06Rik	N4bp1
		S100a1	Lalba			Gabarapl2	BC018507	Ysg2
		S100a5	Lancl1			Timm8a	Dusp11	Phf13
		S100g	Laptm4a			Mrpl50	9430010O03Rik	Eif2c2
		S1pr1	Las1l			Akr1a4	BC023957	1200013I08Rik
		Sart3	Lass2			Psma1	P38ip	Pcaf
		Scarf1	Lats2			Ndufs3	Flot1	Sbno1
		Scgb3a1	Ldb1			2900091E11Rik	1110038D17Rik	4930421J07Rik
		Sdc1	Ldhb			Ndufab1	4930566A11Rik	AW060714
		Sec24d	Leprel2			Etfb	B830022L21Rik	Gtpbp2
		Sec61a1	Lgals6			Qdpr	Flt3	Vnn1
		Selm	Lgals7			Psma6	Agtrap	Arf6
		Sema3d	Lgals8			0610038D11Rik	Sema4b	Notch2
		Sema4c	Lima1			Cyba	Ddx54	0610012A05Rik
		2017-09-04	Limk1			2610207P08Rik	4930579A11Rik	Pscdbp
		Serinc1	Lipe			Snrpe	Fliih	Pscdbp
		Serpinf1	Lmbr1l			Ndufa5	2410001C21Rik	9330177P20Rik
		Sfrs16	Lmf1			Lypla1	Sirt2	1300013G12Rik
		Sgcb	Lmna			Dscr2	Zfp68	Dgat1
		Sgcg	Lmo2			Dbi	Zfp106	1110004F14Rik
		Sgol2	Lonp1			0610010I12Rik	Tceb3	5730533P17Rik
		Sh2b1	Lonp2			Psmd14	BC018601	Alcam
		Sh3gl2	Lox			Ckap1	Baz2a	A830021G03Rik
		Shmt2	Lpin1			6430402H10Rik	Cggbp1	4631408O11Rik
		Shroom3	Lrp10			Ndufb5	P2rx4	Mettl3
		Siae	Lrpap1			6720456B07Rik	Stard3	Pgm1
		Siah2	Lrrc23			Hars2	4022402H07Rik	Etohd2
		Sigirr	Lrrfip1			Mrps14	5830411E10Rik	1110001I14Rik
		Six5	Lsm1			2610001J05Rik	Rab14	LOC227619
		Ski	Lsr			1810008O21Rik	Top1	Bhlhb2
		Skil	Ltb			2810025M15Rik	Arhc	9530098M12Rik
		Slc16a9	Ltbr			D19Wsu55e	Arih2	Arl6ip2
		Slc17a5	Ly6			3300001G02Rik	2410141K03Rik	Antxr2
		Slc22a17	Ly6e			2310010I22Rik	5730589K01Rik	Wwp4
		Slc22a3	Lyl1			Arl6ip5	5730589K01Rik	Fmo5
		Slc22a5	Lysmd2			Aldh7a1	Rps27	Lgals4
		Slc22a9	Macf1			Psma4	Snx2	Axot
		Slc23a2	Mad2l1bp			Ube2r2	C80638	Wdr26
		Slc25a15	Maea			Cks1	Vav1	1200009B18Rik
		Slc35f2	Maged2			Timm8b	Vldlr	E130304C20Rik
		Slc39a6	Man1a			C030004C14Rik	Centb1	Tpd52
		Slc52a2	Man2c1			2010107E04Rik	A730042J05Rik	1500036F01Rik
		Slc7a6	Map1lc3b			Gus	0610037N01Rik	Dhx40
		Smad7	Map2k3			Prdx1	Auh	Map1lc3
		Smarcd2	Map3k11			1110021H02Rik	2810410P22Rik	A730098D12Rik
		Smim11	Map3k7ip3			Gsto1	2900037I21Rik	Gclm
		Smo	Mapk12			Galk1	DXImx46e	Ptbp2
		Smpd1	Mapk14			D11Ertd175e	2700067D09Rik	Cox7a2l
		Smyd2	Mapk8ip3			Siva	Dtx2	4930555L11Rik
		Snapc1	Mapkapk5			Mrps11	Slc30a9	Ik
		Snapc2	2017-03-07			1810009M01Rik	Eif2s2	H2afy
		Snapc5	Masp2			Lsm7	1810028B20Rik	Madh4
		Snrpb2	Matk			Ppp1r7	Ubxdc2	Thbs1
		Snx9	Mbd1			2410015M20Rik	1500036F01Rik	Tcf4
		Sod3	Mccc1			G431001I09Rik	Rrad	Ahr
		Sorcs2	Mcm3ap			Snrpd3	4930488L10Rik	0610013E23Rik
		Sostdc1	Mcoln2			Rpo1-3	Gmfg	Cxcl12
		Sox3	Mcrs1			Plac8	1110032O19Rik	Zfp131
		Spaca1	Mdfi			Mrpl27	Snrk	4833420O05Rik
		Sparcl1	Mdfic			Cct3	Notch1	Pias3
		Spast	Mdm2			Ltb4dh	Fgfr1	Gt(ROSA)26Sor
		Spr	Mea1			Stk19	Fliih	Cpd
		Spry2	Mecp2			Cklfsf7	C530046L02Rik	C330005L02Rik
		Spz1	Med11			Dci	Ncoa4	Golph3
		Ssbp3	Med12			Psmb4	Rbmx	Qk
		Ssbp4	Med20			Rps26	2810407L07Rik	2610202O07Rik
		Ssr4	Med22			Nap1l1	Ly64	Slu7
		Stambp	Med23			Irak1	Icsbp1	1110032C13Rik
		Stard10	Meis1			Mrps28	Procr	Efnb2
		Stard6	Mettl3			2700085E05Rik	1110031E24Rik	8430437G11Rik
		Steap3	Mettl7a1			Mrpl35	Adss	Cebpd
		Strn4	Mettl9			D030012E24Rik	1200014P03Rik	Bcl2l2
		Syde1	Mff			2410018G23Rik	Ifi204	AA793972
		Syt13	Mfge8			2410018G23Rik	5033414D02Rik	Arhgef5
		Syt3	Mfhas1			Cope	Cyb5	Spred2
		Sytl4	Mfn1			0610007P06Rik	Sap18	Cpeb2
		Tacr2	Mfng			1500026D16Rik	Yy1	B230354B21Rik
		Taf13	Midn			0610016J10Rik	Nr3c1	1110017P05Rik
		Taf15	Mina			Dbt	Wnt10a	Esr1
		Tagln3	Mki67ip			2410008G02Rik	Ndel1	Aldh3a2
		Tbxa2r	Mknk2			Pcbd	Ndel1	Adarb1
		Tcea2	Mlycd			Cops6	Vamp2	Riok3
		Tcf4	Mov10			Atp5o	D8Ertd325e	Rgs16
		Tchhl1	Mpdu1			Clast3	Eno2	Ndr2
		Tcp11	Mpdz			Znhit1	Usp3	Map3k11
		Tcta	Mphosph10			Fh1	Usp3	Il1r2
		Tctex1d1	Mpl			2610002K22Rik	Stat3	C77080
		Tek	Mprip			2700099C19Rik	Irf3	C030034J04Rik
		Terf2	Mpv17			2010111E04Rik	Tgoln1	Edg1
		Tgm5	Mrpl17			3010002G01Rik	1110025J15Rik	Rnf19
		Thsd1	Mrpl20			2610511E03Rik	Csad	Sorbs1
		Tie1	Mrpl28			Gsg2	2010315L10Rik	Bag3
		Timp2	Mrpl4			Ruvbl1	2010315L10Rik	Pias3
		Tle4	Mrpl40			Dguok	1110028E10Rik	Atf2
		Tle6	Mrpl44			Fkbp2	Mark2	Socs3
		Tlr3	Mrpl45			Tpi	LOC218811	Galnt3
		Tm4sf1	Mrpl52			Gstp2	Satb1	9130022B02Rik
		Tm4sf20	Mrps12			Cst3	Rgl2	Ndufa3
		Tmem106c	Mrps16			Mrpl51	Txnrd1	A630084M22Rik
		Tmem144	Mrps17			Mut	2610028H07Rik	Cebpg
		Tmem176b	Mrps18a			0710008D09Rik	Arf6	Ssa2
		Tmem177	Mrps31			Mad2l1	BC023040	2700007P21Rik
		Tmem218	Mrps7			2610209M04Rik	Igh-VJ558	Sos2
		Tmem37	Msh2			1810012E07Rik	Pde6a	Smarca3
		Tmem98	Msl2l1			Il17r	Ccl27	Hivep2
		Tmsb10	Msx3				Sh2bpsm1	D4Wsu53e
		Tnfaip8l1	Mtap7				Rassf5	Nfe2l2
		Tnfrsf4	Mterfd1				Igf1r	Tfb2m
		Tnfrsf8	Mtf1				Bckdhb	Ppp2ca
		Tor3a	Mtmr1				Kcnk1	Tgfbi
		Tppp3	Muc1				Zfp385	Styx
		Trafd1	Muc13				Gata2	Cebpb
		Trappc3	Mug1				Tap2	5730497N03Rik
		Trappc4	Mvk				Nr2f2	5730497N03Rik
		Trim13	Mvp				Relb	Mgst1
		Trim28	Mxi1				Ring1	Bnip2
		Trim3	Mybbp1a				Slc41a1	Btg1
		Trim32	Myc				Hoxb5	Adrb2
		Trp53i11	Mycn				D730048C23Rik	Clk
		Trpc4	Myd116				Mvp	Clk3
		Tspan1	Mylc2b				Reg3a	Map2k3
		Tspan6	Myom1				Trfr	Abcb1b
		Ttll9	N4bp1				Cdh5	4930564D15Rik
		Ttpa	N6amt2				P4ha1	Akap9
		Tubb6	Nab1				4930578F06Rik	Slc4a7
		Twist2	Nab2				Smt3ip1	Srrm1
		Twistnb	Naga				Eya2	Litaf
		Txnl1	Naif1				Hdac5	Mef2a
		Uba1	Nap1l4				Zfp30	Il1r1
		Ube2q1	Ncdn				Klf7	AI661017
		Ube2ql1	Nckap1				1110019C08Rik	Ddx6
		Umps	Ncor2				Fem1a	1300002F13Rik
		Upp1	Ndn				2400010D15Rik	AW558171
		Urm1	Ndnl2				Myd116	Ubl3
		Usp28	Ndrg1				Ldb1	Gdap10
		Vamp1	Ndrg2				Adamts1	Clic4
		Vamp2	Ndst2				Tacstd2	Raf1
		Vav2	Ndufa3				5730555F13Rik	Rab18
		Vegfb	Ndufa5				2410002F23Rik	Stat6
		Vstm5	Ndufa6				D1Ucla4	Wdr13
		Wdr18	Ndufa7				9530090G24Rik	6230421P05Rik
		Wnt10a	Ndufaf1				Ppan	Osbpl11
		Wnt11	Ndufb2				B4galt3	Clcn3
		Xrcc1	Ndufb8				D12Ertd7e	Clcn3
		Ylpm1	Ndufb9				1700012P16Rik	Csnk2a2
		Ythdf1	Ndufv2				Ing4	C79248
		Ywhaz	Necap1				Tie1	Zfp288
		Zan	Nedd4				Pdlim1	Tsg101
		Zbtb10	Nek6				Lrpb7	Ogt
		Zc3h15	Nelf				1110038D17Rik	BC005537
		Zdhhc16	Nfatc2				Fln29	0610010C24Rik
		Zfand2a	Nfe2				6330407G04Rik	Rhoip3
		Zfp1	Nfe2l1				Ilvbl	Tnfrsf1b
		Zfp180	Nfkb1				BC012974	Cd53
		Zfp260	Nfkb2				Antxr2	Dusp11
		Zfp275	Nfkbiz				2900008M13Rik	BC023957
		Zfp354a	Nfya				Nr4a2	Ppp3ca
		Zfp385a	Nfyc				Usp2	1110038D17Rik
		Zfp40	Ng23				Pde1b	Tm4sf13
		Zfp422	Ngdn				Irf5	4930579A11Rik
		Zfp467	Nicn1				AI462446	Fliih
		Zfp830	Ninj1				2700059D21Rik	Itga6
		Zfp92	Nipsnap1				Hspa1a	Zfp68
		Zfp958	Nisch				Gltscr2	Gtpat12
		Zkscan1	Nit1				Myo1h	BC018601
		Znf580	Nkiras1				Ccl4	P2rx4
		Zscan21	Nkx2-9				Psmd11	5830411E10Rik
			Nkx6-2				AL022610	Degs
			Nme1				Akap8	Zfp91
			Nol5				D17Wsu92e	Arih2
			Nol5a				Slc22a17	2410141K03Rik
			Nola3				Nrp	Sp3
			Notch1				Jmjd1	Nsccn1
			Nphp1				Siat4c	Vldlr
			Npl				D6Ertd32e	Nfatc2ip
			Nr2c1				Cdc2l2	0610043B10Rik
			Nr4a1				BC042396	Eprs
			Nr4a2				Stx5a	Cic
			Nrap				Ndr2	Adam9
			Nrgn				Mafg	Sf3b1
			Nrsn1				1810031K02Rik	Lpin2
			Nrtn				D11Bwg0434e	DXImx46e
			Nsmaf				Tbc1d1	D6Ertd772e
			Nsmce4a				2400003C14Rik	Snap23
			Nsun4				A530057M15Rik	Atp6v1d
			Ntan1				D19Wsu162e	Rab33b
			Nub1				Gnb2	A230108E06
			Nucb1				LOC56628	1810028B20Rik
			Nudt9				Pkd1	Ubxdc2
			Nup35				Prkcabp	1500036F01Rik
			Nupr1				Rela	Ivns1abp
			Nxf1				Ubtf	Ubp1
			Ocel1				Ormdl3	Rrad
			Odc1				Ptpn14	4930488L10Rik
			Odz2				Macf1	5430401D19Rik
			Orc4l				Ppt2	9130022B02Rik
			Orc5l				H2-Q7	Emp1
			Osbp				Sts	Snrk
			Osbpl1a				Fbxo9	2810405F18Rik
			Otud5				Mpra	1010001H21Rik
			P2rx4				Nfib	2210402G22Rik
			P4ha1				Rab7	LOC328110
			Pafah1b1				Zfp289	Hip1r
			Pafah1b2				Cdc2l2	Ranbp9
			Pam				Vdr	Ncoa4
			Pappa2				Ptpn21	Csnk1e
			Paqr7				Il17r	Ly64
			Parn					Procr
			Parp2					Mdm2
			Pccb					Npc1
			Pcgf2					Foxa3
			Pck2					1200014P03Rik
			Pcm1					Cyb5
			Pcp4l1					Ppm1a
			Pcsk4					2810043O03Rik
			Pcyt2					Ndel1
			Pdcd1					Ndel1
			Pdcd2					Vamp2
			Pdcd6ip					2610016K11Rik
			Pde8a					2310032D16Rik
			Pdgfa					Sh3glb1
			Pdrg1					D8Ertd325e
			Pdzk1ip1					Ddx19
			Pebp1					Eno2
			Peci					Chuk
			Peg3					Stat3
			Peli1					Irf3
			Per1					Tgoln1
			Perp					Csad
			Pex14					2010315L10Rik
			Pex19					2010315L10Rik
			Pex7					Sec63
			Pftk1					C030034J04Rik
			Pgcp					1110028E10Rik
			Pgm1					Rasa1
			Pgm2					Osp94
			Pgrmc1					9130017A15Rik
			Pgs1					Rnf138
			Phc1					Ccrn4l
			Phc2					Zfp101
			Phf1					Txnrd1
			Phf23					BC023040
			Phf7					Ifngr
			Phkg2					Fabp4
			Phlda1					Igh-VJ558
			Phlda2					Prdx6
			Pi4k2a					Gata3
			Pick1					Arhb
			Pigf					0610038L10Rik
			Pigx					6330407G04Rik
			Pik3r1					Fnbp4
			Pik3r2					Jak2
			Pin1					Vasp
			Pitpnm1					Sqstm1
			Pitx2					Igf1r
			Pkd2					Bckdhb
			Pkia					Nr4a1
			Pkp2					Gata2
			Pla2g4a					MGC68300
			Pla2g6					Ltb
			Pld2					Ell
			Pld3					Map3k1
			Plekho1					5430432M24Rik
			Plk2					Vwf
			Plscr1					Orc4l
			Plunc					Slc41a1
			Plxna2					Usp9x
			Plxnd1					Srpk2
			Pmm2					Cdh5
			Pmpcb					Hdac5
			Pnkd					1700017B05Rik
			Pnpla2					Ski
			Pole4					BC013720
			Polg					Klf7
			Polr2c					Arhq
			Polr3d					1110019C08Rik
			Por					Cltc
			Pou2f2					1110004P15Rik
			Pou2f3					Pparbp
			Ppa1					Tacstd2
			Ppap2a					2410002F23Rik
			Ppfibp2					LOC269796
			Ppic					Phlda1
			Ppox					Ifld2
			Ppp1r1a					Pcyt1a
			Ppp2r1b					1700012P16Rik
			Prkcq					Lysal2
			Prkdc					Tie1
			Prnp					2310046H11Rik
			Procr					BC012974
			Prpf38b					Madh7
			Prpsap1					Nr4a2
			Prr15					2810410P22Rik
			Prr6					Usp2
			Pscd2					Sel1h
			Pscd3					Hivep1
			Psmd12					Ctbp2
			Psme1					Vamp4
			Psmg3					Per1
			Ptafr					Hspa1a
			Ptcd3					Myo1h
			Ptger3					Clic4
			Ptger4					Dnajc3
			Ptgs1					Trp53bp1
			Ptk2b					Cry1
			Ptplad1					Slc38a2
			Ptpn12					Skil
			Ptpn18					DXImx46e
			Ptpn2					4930453N24Rik
			Ptpn21					AL022610
			Ptpn9					D17Wsu92e
			Ptprcap					Jmjd1
			Ptpre					1110018O08Rik
			Ptprk					Cdkn1c
			Pttg1					Arih1
			Puf60					2010200I23Rik
			Pura					D6Ertd32e
			Pvt1					Cdc2l2
			Pxn					Stx5a
			Pycrl					Ndr2
			RP23-136K12.4					Mafg
			Rab11a					2400003C14Rik
			Rab11b					Zfp144
			Rab11fip5					LOC56628
			Rab18					Pnrc1
			Rab4a					Pkd1
			Rab6ip1					H2-D1
			Rabac1					Cdipt
			Rabep1					Pfkp
			Rabggtb					Lmna
			Rag1ap1					Ormdl3
			Rai1					H2-Q7
			Ramp1					Rock2
			Ramp3					Bcl2
			Ranbp3					Fbxo9
			Rarg					Gpd2
			Rasa3					Tmod3
			Rasd1					Mad4
			Rasip1					Usp9x
			Rasl11b					Ptov1
			Rassf1					Cdc2l2
			Rbbp6					Ptpn21
			Rbbp9
			Rbm25
			Rbm38
			Rbm42
			Rbm4b
			Rbp1
			Rbpms
			Rcan3
			Rcl1
			Rcn1
			Reep6
			Rela
			Relb
			Reps1
			Retsat
			Rfc3
			Rfng
			Rfxank
			Rgl2
			Rgs16
			Rhob
			Rhod
			Rin2
			Rit1
			Rnaseh1
			Rnf103
			Rnf123
			Rnf138
			Rnf145
			Rnf19a
			Rnf34
			Rnf4
			Rnf8
			Rnft1
			Rnmtl1
			Rock2
			Rpl10a
			Rpl36
			Rpl37a
			Rpl7
			Rpl7l1
			Rpo1-2
			Rpp14
			Rprm
			Rps10
			Rps12
			Rps17
			Rpusd4
			Rrad
			Rras
			Rreb1
			Rshl2a
			Rsph1
			Rtkn
			Runx2
			Rusc1
			Rwdd1
			Rxrb
			Ryk
			S100a1
			S100a13
			Sac3d1
			Sap30l
			Sart3
			Sbds
			Scd2
			Scmh1
			Scn1b
			Scyl1
			Sec23a
			Sec61g
			Selenbp1
			Selk
			Selp
			Sema6b
			Senp3
			Serpina3g
			Serpinb6a
			Serpinf1
			Serpinf2
			Serping1
			Serpinh1
			Serpini1
			Sertad1
			Sfpi1
			Sfpq
			Sfrp2
			Sfrs16
			Sfrs3
			Sfrs6
			Sgcb
			Sgce
			Sh3d19
			Sh3gl1
			Shroom3
			Siah1a
			Siglec1
			Sin3a
			Sirt3
			Skil
			Slc12a2
			Slc12a7
			Slc16a2
			Slc19a1
			Slc1a4
			Slc20a1
			Slc22a17
			Slc22a18
			Slc22a21
			Slc25a17
			Slc30a3
			Slc31a1
			Slc38a10
			Slc39a4
			Slc3a2
			Slc4a1ap
			Slc4a2
			Slc4a3
			Slc6a6
			Slc7a5
			Slc9a1
			Slk
			Smad1
			Smad2
			Smad4
			Smad6
			Smad7
			Smarca2
			Smarcad1
			Smpd2
			Sms
			Smyd1
			Snhg1
			Snrpc
			Snx12
			Socs3
			Sos1
			Sox6
			Sp4
			Sphk1
			Spn
			Sqstm1
			Sra1
			Srpr
			Srrm1
			Srst
			Ssbp2
			Ssbp4
			Sstr2
			St7
			Stam
			Star
			Stard10
			Stard3
			Stat4
			Stat5a
			Stat6
			Stbd1
			Stim1
			Stk11
			Stk11ip
			Stk16
			Stk25
			Stk40
			Sts
			Stub1
			Stx5a
			Stx6
			Stxbp1
			Stxbp3a
			Suclg2
			Supt6h
			Surf4
			Surf6
			Sytl4
			Tac1
			Tacstd2
			Taf1a
			Taf1c
			Taf8
			Tagln2
			Tal1
			Tank
			Tap1
			Tap2
			Tarbp2
			Tars2
			Tbc1d15
			Tbce
			Tbp
			Tbrg1
			Tbrg4
			Tbxas1
			Tcea2
			Tceb3
			Tcf15
			Tcf25
			Tcfcp2l1
			Tead2
			Tec
			Tek
			Tes
			Tesk1
			Tex264
			Tfb2m
			Tfip11
			Tfpi
			Tgfb3
			Tgif1
			Tgm2
			Tgtp
			Tha1
			Thra
			Tie1
			Timp3
			Tinf2
			Tjp1
			Tk2
			Tle1
			Tlk2
			Tm2d2
			Tm2d3
			Tmbim1
			Tmem126a
			Tmem141
			Tmem176a
			Tmem176b
			Tmem181
			Tmem183a
			Tmem49
			Tmem66
			Tmem70
			Tmod3
			Tmub2
			Tnfaip1
			Tnfaip2
			Tnfrsf1b
			Tnip1
			Tnni3
			Tom1l1
			Tomm7
			Top3a
			Tor1b
			Tor2a
			Tpd52l2
			Tpm1
			Tpp2
			Tpst2
			Tpt1
			Tradd
			Traf1
			Traf2
			Traf3
			Traf4
			Trap1a
			Trfr2
			Trim13
			Trip6
			Tro
			Trpc4ap
			Trpc6
			Tsc22d1
			Tsg101
			Tsn
			Tspan31
			Tspan32
			Tsta3
			Ttc17
			Ttc3
			Tubb2b
			Tubgcp4
			Twsg1
			Txnl1
			Txnrd1
			Txnrd2
			Tymp
			Uba5
			Ubac2
			Ubap1
			Ubc
			Ube1l
			Ube2d2
			Ube2e3
			Ube2i
			Ube2r2
			Ube2t
			Ubtf
			Ubxd1
			Ubxd5
			Uck1
			Uck2
			Ulk1
			Umps
			Upp1
			Uqcrc2
			Use1
			Usmg5
			Usp10
			Usp19
			Usp38
			Usp4
			Utp20
			Vamp2
			Vamp3
			Vamp5
			Vamp8
			Vdr
			Vegfa
			Vegfb
			Vegfc
			Vkorc1
			Vldlr
			Vnn1
			Vti1b
			Wars
			Wbp1
			Wbp4
			Wbp5
			Wdr23
			Wdr43
			Wdr45
			Wdr45l
			Wdr55
			Wdr6
			Wdr85
			Wfdc2
			Wipi2
			Wnt1
			Wnt11
			Wsb2
			Wtap
			Wwc2
			Wwp2
			Xab2
			Xpo6
			Xrcc1
			Xrcc5
			Yap1
			Yes1
			Ylpm1
			Ywhab
			Ywhah
			Zbtb17
			Zc3h14
			Zcchc3
			Zeb1
			Zfml
			Zfp1
			Zfp110
			Zfp161
			Zfp239
			Zfp259
			Zfp275
			Zfp28
			Zfp292
			Zfp30
			Zfp316
			Zfp35
			Zfp36
			Zfp36l2
			Zfp40
			Zfp46
			Zfp53
			Zfp54
			Zfp64
			Zfp68
			Zfp821
			Zfp90
			Zfp93
			Zfp97
			Zfpm1
			Zfr
			Zfx
			Zhx1
			Zkscan3
			Zmat3
			Zmym4
			Zmynd11
			Zrsr1
			Zrsr2
			Zscan12
			Zscan21
