# Supplementary material for: Aging alters the epigenetic asymmetry of HSC division
Source: PLoS Biol. 2018 Sep 20;16(9):e2003389. doi: 10.1371/journal.pbio.2003389 (PMC6168157; doi:10.1371/journal.pbio.2003389)
Supplement: S6 Table — (XLS) [file pbio.2003389.s026.xls]

## Sheet: ED Table4
Table S6
universe		Young	CASIN	Aged	WNT5A
170	1810064F22Rik|XLOC_022120	1	1	0	0
307	2900060B14Rik|XLOC_000983	1	1	0	0
391	4930513N10Rik|XLOC_020603	1	1	0	0
432	4933400F21Rik|XLOC_000930	1	1	0	0
493	6030440G07Rik|XLOC_004602	1	1	0	0
574	9930111J21Rik2|XLOC_003459	1	1	0	0
654	Abca3|XLOC_008505	1	1	0	0
683	Abcg3|XLOC_016416	1	1	0	0
684	Abhd1|XLOC_015505	1	1	0	0
767	Acrbp|XLOC_017277	1	1	0	0
1563	AW046200|XLOC_020387	1	1	0	0
1605	B430319G15Rik|XLOC_022472	1	1	0	0
1626	Bach2|XLOC_014027	1	1	0	0
1637	Baiap3|XLOC_009094	1	1	0	0
1687	BC025920|XLOC_001657	1	1	0	0
1878	Btbd18|XLOC_011227	1	1	0	0
1910	C030039L03Rik|XLOC_018285	1	1	0	0
1982	Cadps2|XLOC_017440	1	1	0	0
2185	Ccdc78|XLOC_008548	1	1	0	0
2287	Cd300lf|XLOC_004096	1	1	0	0
2321	Cda|XLOC_015234	1	1	0	0
2359	Cdcp1|XLOC_022643	1	1	0	0
2414	Ceacam1|XLOC_019308	1	1	0	0
2504	Cgnl1|XLOC_022411	1	1	0	0
2507	Chac1|XLOC_011443	1	1	0	0
2576	Chst2|XLOC_022475	1	1	0	0
2633	Cldnd2|XLOC_018391	1	1	0	0
2884	Creb3l4|XLOC_013657	1	1	0	0
2885	Creb5|XLOC_016977	1	1	0	0
2895	Crim1|XLOC_008911	1	1	0	0
2949	Csrnp2|XLOC_007575	1	1	0	0
3132	D830030K20Rik|XLOC_005917	1	1	0	0
3290	Dennd2c|XLOC_013228	1	1	0	0
3388	Dlg2|XLOC_018615	1	1	0	0
3531	Draxin|XLOC_015311	1	1	0	0
3616	E030024N20Rik|XLOC_010275	1	1	0	0
3780	Eif4g2|XLOC_019932	1	1	0	0
3801	Ell3|XLOC_012504	1	1	0	0
4037	F830016B08Rik|XLOC_009734	1	1	0	0
4200	Fam71e1|XLOC_018436	1	1	0	0
4272	Fbxo15|XLOC_009824	1	1	0	0
4296	Fbxo47|XLOC_003892	1	1	0	0
4357	Fgf18|XLOC_003416	1	1	0	0
4419	Flt4|XLOC_002587	1	1	0	0
4448	Foxc1|XLOC_005139	1	1	0	0
4536	G0s2|XLOC_001306	1	1	0	0
4552	Gabbr1|XLOC_008738	1	1	0	0
4559	Gabre|XLOC_023408	1	1	0	0
4595	Gapdh|XLOC_017876	1	1	0	0
4838	Gm14023|XLOC_011516	1	1	0	0
4862	Gm15441|XLOC_013741	1	1	0	0
4873	Gm15910|XLOC_001792	1	1	0	0
4885	Gm16617|XLOC_006511	1	1	0	0
4911	Gm19522|XLOC_008192	1	1	0	0
4915	Gm19757|XLOC_017776	1	1	0	0
4929	Gm20753|XLOC_000972	1	1	0	0
4952	Gm4285|XLOC_006691	1	1	0	0
4979	Gm527|XLOC_004338	1	1	0	0
5102	Golga7b|XLOC_010386	1	1	0	0
5187	Gprc5a|XLOC_017342	1	1	0	0
5387	Hbb-y|XLOC_019815	1	1	0	0
5495	Hist1h2ad|XLOC_005093	1	1	0	0
5510	Hist1h2bh|XLOC_005520	1	1	0	0
5663	Hsd17b14|XLOC_018466	1	1	0	0
5763	Ifit1|XLOC_010338	1	1	0	0
5798	Igf2bp3|XLOC_017556	1	1	0	0
5806	Igll1|XLOC_008039	1	1	0	0
5828	Il11|XLOC_019057	1	1	0	0
6068	Jrk|XLOC_007308	1	1	0	0
6498	Lpar4|XLOC_023010	1	1	0	0
6513	Lrba|XLOC_013037	1	1	0	0
6549	Lrrc39|XLOC_013286	1	1	0	0
6563	Lrrc6|XLOC_007288	1	1	0	0
6584	Lrrn4cl|XLOC_010190	1	1	0	0
6630	Ly75|XLOC_012117	1	1	0	0
6686	Magee2|XLOC_023532	1	1	0	0
6927	Mei4|XLOC_021774	1	1	0	0
7082	Mir466i|XLOC_005039	1	1	0	0
7136	Mir8116|XLOC_015974	1	1	0	0
7187	Mmrn2|XLOC_006030	1	1	0	0
7437	Mtus1|XLOC_020937	1	1	0	0
7467	Mybl1|XLOC_000662	1	1	0	0
7556	Naif1|XLOC_011054	1	1	0	0
7642	Ndrg4|XLOC_020601	1	1	0	0
7863	Notch1|XLOC_011971	1	1	0	0
7888	Nppc|XLOC_000918	1	1	0	0
7898	Npy1r|XLOC_020400	1	1	0	0
8039	Nwd1|XLOC_020474	1	1	0	0
8282	Pbld2|XLOC_001504	1	1	0	0
8303	Pcdhb5|XLOC_009645	1	1	0	0
8497	Phex|XLOC_023653	1	1	0	0
8993	Prex2|XLOC_000016	1	1	0	0
9103	Psd3|XLOC_020995	1	1	0	0
9178	Ptgds|XLOC_011945	1	1	0	0
9197	Ptma|XLOC_000252	1	1	0	0
9334	Rab33a|XLOC_022818	1	1	0	0
9359	Rab6b|XLOC_021844	1	1	0	0
9400	Raet1a,Raet1b,Raet1c,Raet1d,Raet1e|XLOC_001367	1	1	0	0
9460	Rasgrp4|XLOC_018316	1	1	0	0
9563	Reck|XLOC_014089	1	1	0	0
9860	Rpl5|XLOC_015763	1	1	0	0
9867	Rplp0|XLOC_015830	1	1	0	0
9895	Rps16|XLOC_018296	1	1	0	0
9918	Rps6|XLOC_014916	1	1	0	0
9974	Rspo1|XLOC_014393	1	1	0	0
10320	Sgsh|XLOC_004156	1	1	0	0
10322	Sgsm2|XLOC_003706	1	1	0	0
10530	Slc28a3|XLOC_005683	1	1	0	0
10787	Snora31|XLOC_006250	1	1	0	0
10792	Snora44|XLOC_014451	1	1	0	0
10819	Snord8|XLOC_006517	1	1	0	0
10865	Snx29|XLOC_007674	1	1	0	0
10956	Spef2|XLOC_007175	1	1	0	0
11188	Styk1|XLOC_017942	1	1	0	0
11547	Thsd4|XLOC_022349	1	1	0	0
11773	Tmem38a|XLOC_020473	1	1	0	0
11856	Tnfrsf11a|XLOC_000330	1	1	0	0
11873	Tnfsf8|XLOC_014886	1	1	0	0
11881	Tnks|XLOC_020922	1	1	0	0
11895	Tns1|XLOC_000858	1	1	0	0
12034	Trim43b|XLOC_022463	1	1	0	0
12050	Trim9|XLOC_004792	1	1	0	0
12137	Tspan2|XLOC_013223	1	1	0	0
12166	Tsx|XLOC_022992	1	1	0	0
12677	Wdr65|XLOC_015053	1	1	0	0
12724	Wnt4|XLOC_014503	1	1	0	0
12743	Xcr1|XLOC_022649	1	1	0	0
12880	Zc3h3|XLOC_007328	1	1	0	0
12916	Zdhhc21|XLOC_014905	1	1	0	0
13047	Zfp418|XLOC_018078	1	1	0	0
13054	Zfp433|XLOC_001662	1	1	0	0
13071	Zfp488|XLOC_006419	1	1	0	0
13212	Zfp867|XLOC_003548	1	1	0	0
13284	Zkscan4|XLOC_005051	1	1	0	0
