# Supplementary material for: Aging alters the epigenetic asymmetry of HSC division
Source: PLoS Biol. 2018 Sep 20;16(9):e2003389. doi: 10.1371/journal.pbio.2003389 (PMC6168157; doi:10.1371/journal.pbio.2003389)
Supplement: S7 Table — (XLS) [file pbio.2003389.s027.xls]

## Sheet: UP_140_set_Aged_and_WNT5A_only.
	Table S7
universe		Young	CASIN	Aged	WNT5A
64	1700001G11Rik|XLOC_006642	0	0	1	1
91	1700020L24Rik|XLOC_002946	0	0	1	1
126	1700088E04Rik|XLOC_007394	0	0	1	1
227	2410004P03Rik|XLOC_004683	0	0	1	1
259	2610307P16Rik|XLOC_005557	0	0	1	1
264	2610528A11Rik|XLOC_006435	0	0	1	1
369	4930451G09Rik|XLOC_007653	0	0	1	1
375	4930465K10Rik|XLOC_009811	0	0	1	1
450	4933431E20Rik|XLOC_013814	0	0	1	1
483	5830416P10Rik|XLOC_010826	0	0	1	1
509	6530402F18Rik,Ntng2|XLOC_012001	0	0	1	1
616	A930001C03Rik|XLOC_010109	0	0	1	1
716	Acacb|XLOC_015809	0	0	1	1
782	Actl6b|XLOC_015978	0	0	1	1
1139	Ano8|XLOC_021040	0	0	1	1
1153	Aoah|XLOC_005044	0	0	1	1
1203	Aplp1|XLOC_019379	0	0	1	1
1617	B930003M22Rik|XLOC_008404	0	0	1	1
1716	BC068281|XLOC_004216	0	0	1	1
1747	Bcl6b|XLOC_003646	0	0	1	1
1832	Bpifb5|XLOC_011662	0	0	1	1
1950	C630043F03Rik|XLOC_014172	0	0	1	1
2205	Ccl24|XLOC_016624	0	0	1	1
2215	Ccm2l|XLOC_011643	0	0	1	1
2407	Cdr2l|XLOC_003218	0	0	1	1
2479	Cep85l|XLOC_002023	0	0	1	1
2641	Clec2f|XLOC_017306	0	0	1	1
2737	Cntd1|XLOC_003120	0	0	1	1
2855	Cpne7|XLOC_020752	0	0	1	1
3075	Cyp2u1|XLOC_013897	0	0	1	1
3197	Dclk2|XLOC_013603	0	0	1	1
3203	Dcp2|XLOC_009684	0	0	1	1
3371	Dip2a|XLOC_002103	0	0	1	1
3412	Dnah8|XLOC_008605	0	0	1	1
3528	Dram1|XLOC_002225	0	0	1	1
3625	E130304I02Rik|XLOC_018370	0	0	1	1
3631	E130317F20Rik|XLOC_002147	0	0	1	1
3700	Efemp2|XLOC_010131	0	0	1	1
3790	Elane|XLOC_001600	0	0	1	1
4165	Fam227b|XLOC_012526	0	0	1	1
4210	Fam83g|XLOC_002704	0	0	1	1
4303	Fbxw10|XLOC_002717	0	0	1	1
4372	Fhit|XLOC_006335	0	0	1	1
4541	G630025P09Rik|XLOC_002768	0	0	1	1
4591	Gamt|XLOC_002155	0	0	1	1
4649	Gcsam|XLOC_007862	0	0	1	1
4675	Gfi1|XLOC_016430	0	0	1	1
4789	Gm10658|XLOC_022320	0	0	1	1
4849	Gm14403|XLOC_011824	0	0	1	1
4945	Gm3414|XLOC_016250	0	0	1	1
4955	Gm4489|XLOC_001797	0	0	1	1
5118	Gp1ba|XLOC_002798	0	0	1	1
5169	Gpr161|XLOC_000506	0	0	1	1
5238	Gsg1|XLOC_017969	0	0	1	1
5485	Hipk4|XLOC_018281	0	0	1	1
5603	Homer2|XLOC_019671	0	0	1	1
5655	Hs6st2|XLOC_023331	0	0	1	1
5780	Ift172|XLOC_016188	0	0	1	1
5803	Igflr1|XLOC_018344	0	0	1	1
5813	Igsf9|XLOC_000554	0	0	1	1
5842	Il18r1|XLOC_000089	0	0	1	1
5844	Il1b|XLOC_012553	0	0	1	1
5845	Il1bos|XLOC_011517	0	0	1	1
5848	Il1r2|XLOC_000085	0	0	1	1
5852	Il1rl2|XLOC_000087	0	0	1	1
5854	Il20rb|XLOC_022501	0	0	1	1
5901	Ino80dos|XLOC_000159	0	0	1	1
6006	Itgal|XLOC_018880	0	0	1	1
6046	Jag2|XLOC_004987	0	0	1	1
6093	Katnal2|XLOC_010055	0	0	1	1
6098	Kbtbd11|XLOC_020235	0	0	1	1
6125	Kcns1|XLOC_012726	0	0	1	1
6163	Kdm7a|XLOC_017501	0	0	1	1
6259	Klhl35|XLOC_018641	0	0	1	1
6273	Klrb1f|XLOC_017307	0	0	1	1
6439	Lingo3|XLOC_002173	0	0	1	1
6517	Lrfn1,Mir466f-2|XLOC_018300	0	0	1	1
6548	Lrrc36|XLOC_020635	0	0	1	1
6586	Lrsam1|XLOC_012039	0	0	1	1
6609	Ltb4r1|XLOC_006141	0	0	1	1
6638	Lypd6|XLOC_011121	0	0	1	1
6837	Mcc|XLOC_009958	0	0	1	1
7126	Mir7678,Slpi|XLOC_012734	0	0	1	1
7156	Mks1|XLOC_002986	0	0	1	1
7246	Mpst|XLOC_006949	0	0	1	1
7463	Mxra8|XLOC_014651	0	0	1	1
7469	Mybpc3|XLOC_011328	0	0	1	1
7604	Nccrp1|XLOC_019345	0	0	1	1
7618	Ncmap|XLOC_015210	0	0	1	1
7723	Neurl1a|XLOC_010430	0	0	1	1
7725	Neurl2|XLOC_012749	0	0	1	1
7798	Nkpd1|XLOC_018173	0	0	1	1
7876	Npffr1|XLOC_001490	0	0	1	1
7878	Nphp3|XLOC_021848	0	0	1	1
8179	P2rx3|XLOC_012199	0	0	1	1
8223	Palm|XLOC_001595	0	0	1	1
8405	Pdzd9|XLOC_019969	0	0	1	1
8427	Per2|XLOC_000939	0	0	1	1
8462	Pfn2|XLOC_013525	0	0	1	1
8731	Pm20d2|XLOC_014718	0	0	1	1
8749	Pnma1|XLOC_004850	0	0	1	1
9229	Ptprf|XLOC_015046	0	0	1	1
9288	Qprt|XLOC_020018	0	0	1	1
9441	Rapgefl1|XLOC_003085	0	0	1	1
9464	Rasl12|XLOC_021699	0	0	1	1
9468	Rassf4|XLOC_017813	0	0	1	1
9578	Rem2|XLOC_006113	0	0	1	1
9755	Rnf208|XLOC_010953	0	0	1	1
9992	Rtn4r|XLOC_007721	0	0	1	1
10205	Sema4a|XLOC_013625	0	0	1	1
10342	Sh3gl3|XLOC_018582	0	0	1	1
10352	Shank3|XLOC_007055	0	0	1	1
10379	Siglec5|XLOC_018387	0	0	1	1
10383	Sik2|XLOC_022282	0	0	1	1
10426	Slamf9|XLOC_000553	0	0	1	1
10643	Slc9a5|XLOC_020633	0	0	1	1
10815	Snord35a|XLOC_019499	0	0	1	1
10818	Snord55|XLOC_015032	0	0	1	1
10944	Spata9|XLOC_005315	0	0	1	1
11026	Srgap3|XLOC_017785	0	0	1	1
11525	Thbd|XLOC_012620	0	0	1	1
11557	Tiam2|XLOC_008375	0	0	1	1
11727	Tmem202|XLOC_022346	0	0	1	1
11788	Tmem51|XLOC_015274	0	0	1	1
11819	Tmem88b|XLOC_015372	0	0	1	1
11835	Tmprss7|XLOC_008207	0	0	1	1
11981	Tram2|XLOC_000696	0	0	1	1
12129	Tslp|XLOC_009601	0	0	1	1
12148	Tspear|XLOC_001557	0	0	1	1
12186	Ttc36|XLOC_022240	0	0	1	1
12412	Unc79|XLOC_004494	0	0	1	1
12459	Usp20|XLOC_011034	0	0	1	1
12565	Vmn2r29|XLOC_019092	0	0	1	1
12756	Xlr4c|XLOC_023421	0	0	1	1
12834	Zbtb12|XLOC_008676	0	0	1	1
12858	Zbtb46|XLOC_012845	0	0	1	1
12872	Zc3h12a|XLOC_015103	0	0	1	1
13134	Zfp651|XLOC_021997	0	0	1	1
13275	Zhx3|XLOC_012713	0	0	1	1
13316	Zpbp|XLOC_003361	0	0	1	1
