# Supplementary material for: Aging alters the epigenetic asymmetry of HSC division
Source: PLoS Biol. 2018 Sep 20;16(9):e2003389. doi: 10.1371/journal.pbio.2003389 (PMC6168157; doi:10.1371/journal.pbio.2003389)
Supplement: S8 Table — (XLSX) [file pbio.2003389.s028.xlsx]

## Sheet: Summary_all_analysis
No	Cell.pair	overlap	bed1	bed2	r	Mean.Pred.Overp	Age	pairs.peaks.ratio	pairs.peaks.ratio.scaled	A	B	mapped_A	mapped_B	pairs.peaks.ratio.read.adjusted	pairs.peaks.ratio.read.adjusted.scaled	bed1.read.adjusted	bed2.read.adjusted	E	Chi	p.value	sig	symmetry
1	3a1	783	1041	7056	0	2.013	a	0.147534	6.7781	3a1A	3a1B	166142	443756	0.394055	2.53772	6265.72	15900.6	11083.2	4187.94	0	sig	Asymmetry
2	3a2	2245	4539	5682	0	6.99	a	0.798838	1.25182	3a2A	3a2B	293492	331230	0.901555	1.10919	15465.5	17154.2	16309.9	87.4274	8.74299e-21	sig	Symmetry
3	3a3	85	3298	367	0	0.316	a	8.98638	8.98638	3a3A	3a3B	266130	78790	2.66049	2.66049	12392.4	4657.95	8525.2	3508.56	0	sig	Asymmetry
4	3a4	838	12980	1149	0	3.954	a	11.2968	11.2968	3a4A	3a4B	666394	210314	3.56526	3.56526	19478	5463.26	12470.6	7874.99	0	sig	Asymmetry
5	3a5	968	1321	12142	0	4.142	a	0.108796	9.19152	3a5A	3a5B	238784	578334	0.263503	3.79502	5532.2	20994.8	13263.5	9013.15	0	sig	Asymmetry
14	4a10	1	2	2	0	0	a	1	1	4a10A	4a10B	22504	6820	0.303057	3.29971	88.8731	293.255	191.064	109.314	1.385e-25	sig	Symmetry
15	4a11	1	1	9	0	0	a	0.111111	9	4a11A	4a11B	5426	41660	0.853094	1.1722	184.298	216.035	200.166	2.51596	0.112699	NS	Symmetry
16	4a12	2	3	5	0	0	a	0.6	1.66667	4a12A	4a12B	16760	21102	0.755442	1.32373	178.998	236.944	207.971	8.07282	0.00449341	NS	Symmetry
17	4a6	1	12	2	0	0	a	6	6	4a6A	4a6B	55088	11790	1.28413	1.28413	217.833	169.635	193.734	5.99545	0.0143428	NS	Symmetry
18	4a8	4	10	138	0	0	a	0.0724638	13.8	4a8A	4a8B	39226	49814	0.0920234	10.8668	254.933	2770.31	1512.62	2091.44	0	sig	Symmetry
6	3y1	6	1529	15	0	0.005	y	101.933	101.933	3y1A	3y1B	211042	51942	25.088	25.088	7245	288.784	3766.89	6422.93	0	sig	Asymmetry
7	3y2	891	7355	1122	0	2.156	y	6.55526	6.55526	3y2A	3y2B	515796	183710	2.33477	2.33477	14259.5	6107.45	10183.5	3262.94	0	sig	Asymmetry
8	3y3	986	1222	6786	0	2.099	y	0.180077	5.55319	3y3A	3y3B	198126	431172	0.391892	2.55172	6167.79	15738.5	10953.1	4181.38	0	sig	Asymmetry
9	3y4	2706	4566	6065	0	6.748	y	0.752844	1.3283	3y4A	3y4B	307898	356796	0.872405	1.14626	14829.6	16998.5	15914	147.801	5.24358e-34	sig	Symmetry
10	3y5	7	1048	10	0	0.008	y	104.8	104.8	3y5A	3y5B	203676	48802	25.1107	25.1107	5145.43	204.91	2675.17	4562.09	0	sig	Asymmetry
11	3y6	510	6069	641	0	0.905	y	9.46802	9.46802	3y6A	3y6B	509182	173568	3.22742	3.22742	11919.1	3693.08	7806.1	4334.29	0	sig	Asymmetry
12	3y7	508	697	6472	0	1.135	y	0.107695	9.28551	3y7A	3y7B	197398	492296	0.268583	3.72325	3530.94	13146.6	8338.75	5544.01	0	sig	Asymmetry
13	3y8	1613	3839	4826	0	4.689	y	0.795483	1.2571	3y8A	3y8B	333976	362130	0.862542	1.15936	11494.8	13326.7	12410.8	135.195	2.99336e-31	sig	Symmetry
19	4y1	2629	5667	6885	0	10.174	y	0.823094	1.21493	4y1A	4y1B	407418	441512	0.891973	1.12111	13909.5	15594.1	14751.8	96.1864	1.04562e-22	sig	Symmetry
20	4y2	2	2	4	0	0	y	0.5	2	4y2A	4y2B	15760	15262	0.484201	2.06526	126.904	262.089	194.496	46.9805	7.16959e-12	sig	Symmetry
21	4y3	2	252	3	0	0	y	84	84	4y3A	4y3B	74850	13808	15.496	15.496	3366.73	217.265	1792	2767.62	0	sig	Symmetry
22	4y5	4	105	119	0	0.003	y	0.882353	1.13333	4y5A	4y5B	42676	48388	1.00045	1.00045	2460.4	2459.29	2459.84	0.000251283	0.987353	NS	Symmetry
23	5y5	6	1256	12	0	0.01	y	104.667	104.667	5y5A	5y5B	174894	41338	24.739	24.739	7181.49	290.29	3735.89	6355.74	0	sig	Asymmetry
24	5y6	664	6932	925	0	1.588	y	7.49405	7.49405	5y6A	5y6B	483512	153308	2.37615	2.37615	14336.8	6033.61	10185.2	3384.45	0	sig	Asymmetry
