# Supplementary material for: Aging alters the epigenetic asymmetry of HSC division
Source: PLoS Biol. 2018 Sep 20;16(9):e2003389. doi: 10.1371/journal.pbio.2003389 (PMC6168157; doi:10.1371/journal.pbio.2003389)
Supplement: S9 Table — (XLSX) [file pbio.2003389.s029.xlsx]

## Sheet: 3a1_overlap_Motif
universe		A	B
2	AP-1(bZIP)/ThioMac-PU.1-ChIP-Seq(GSE21512)/Homer/VTGACTCATC	1	1
4	Atf1(bZIP)/K562-ATF1-ChIP-Seq(GSE31477)/Homer/GATGACGTCA	1	1
6	Atf3(bZIP)/GBM-ATF3-ChIP-Seq(GSE33912)/Homer/DATGASTCATHN	1	1
10	Bach2(bZIP)/OCILy7-Bach2-ChIP-Seq(GSE44420)/Homer/TGCTGAGTCA	1	1
11	BATF(bZIP)/Th17-BATF-ChIP-Seq(GSE39756)/Homer/DATGASTCAT	1	1
12	bHLHE40(bHLH)/HepG2-BHLHE40-ChIP-Seq(GSE31477)/Homer/KCACGTGMCN	1	1
19	CLOCK(bHLH)/Liver-Clock-ChIP-Seq(GSE39860)/Homer/GHCACGTG	1	1
20	c-Myc(bHLH)/LNCAP-cMyc-ChIP-Seq(Unpublished)/Homer/VCCACGTG	1	1
22	CRE(bZIP)/Promoter/Homer/CSGTGACGTCAC	1	1
27	E2F3(E2F)/MEF-E2F3-ChIP-Seq(GSE71376)/Homer/BTKGGCGGGAAA	1	1
28	E2F4(E2F)/K562-E2F4-ChIP-Seq(GSE31477)/Homer/GGCGGGAAAH	1	1
29	E2F6(E2F)/Hela-E2F6-ChIP-Seq(GSE31477)/Homer/GGCGGGAARN	1	1
30	E2F7(E2F)/Hela-E2F7-ChIP-Seq(GSE32673)/Homer/VDTTTCCCGCCA	1	1
31	E-box(bHLH)/Promoter/Homer/SSGGTCACGTGA	1	1
32	Egr1(Zf)/K562-Egr1-ChIP-Seq(GSE32465)/Homer/TGCGTGGGYG	1	1
33	Egr2(Zf)/Thymocytes-Egr2-ChIP-Seq(GSE34254)/Homer/NGCGTGGGCGGR	1	1
34	EHF(ETS)/LoVo-EHF-ChIP-Seq(GSE49402)/Homer/AVCAGGAAGT	1	1
35	EKLF(Zf)/Erythrocyte-Klf1-ChIP-Seq(GSE20478)/Homer/NWGGGTGTGGCY	1	1
36	ELF1(ETS)/Jurkat-ELF1-ChIP-Seq(SRA014231)/Homer/AVCCGGAAGT	1	1
37	ELF3(ETS)/PDAC-ELF3-ChIP-Seq(GSE64557)/Homer/ANCAGGAAGT	1	1
38	ELF5(ETS)/T47D-ELF5-ChIP-Seq(GSE30407)/Homer/ACVAGGAAGT	1	1
39	Elk1(ETS)/Hela-Elk1-ChIP-Seq(GSE31477)/Homer/HACTTCCGGY	1	1
40	Elk4(ETS)/Hela-Elk4-ChIP-Seq(GSE31477)/Homer/NRYTTCCGGY	1	1
41	ERG(ETS)/VCaP-ERG-ChIP-Seq(GSE14097)/Homer/ACAGGAAGTG	1	1
42	Ets1-distal(ETS)/CD4+-PolII-ChIP-Seq(Barski_et_al.)/Homer/MACAGGAAGT	1	1
43	ETS1(ETS)/Jurkat-ETS1-ChIP-Seq(GSE17954)/Homer/ACAGGAAGTG	1	1
44	ETS:E-box(ETS,bHLH)/HPC7-Scl-ChIP-Seq(GSE22178)/Homer/AGGAARCAGCTG	1	1
45	ETS(ETS)/Promoter/Homer/AACCGGAAGT	1	1
46	ETS:RUNX(ETS,Runt)/Jurkat-RUNX1-ChIP-Seq(GSE17954)/Homer/RCAGGATGTGGT	1	1
47	ETV1(ETS)/GIST48-ETV1-ChIP-Seq(GSE22441)/Homer/AACCGGAAGT	1	1
48	Etv2(ETS)/ES-ER71-ChIP-Seq(GSE59402)/Homer(0.967)/NNAYTTCCTGHN	1	1
49	EWS:ERG-fusion(ETS)/CADO_ES1-EWS:ERG-ChIP-Seq(SRA014231)/Homer/ATTTCCTGTN	1	1
50	EWS:FLI1-fusion(ETS)/SK_N_MC-EWS:FLI1-ChIP-Seq(SRA014231)/Homer/VACAGGAAAT	1	1
51	Fli1(ETS)/CD8-FLI-ChIP-Seq(GSE20898)/Homer/NRYTTCCGGH	1	1
52	Fosl2(bZIP)/3T3L1-Fosl2-ChIP-Seq(GSE56872)/Homer/NATGASTCABNN	1	1
53	Foxo1(Forkhead)/RAW-Foxo1-ChIP-Seq(Fan_et_al.)/Homer/CTGTTTAC	1	1
54	Fra1(bZIP)/BT549-Fra1-ChIP-Seq(GSE46166)/Homer/NNATGASTCATH	1	1
55	Fra2(bZIP)/Striatum-Fra2-ChIP-Seq(GSE43429)/Homer/GGATGACTCATC	1	1
56	GABPA(ETS)/Jurkat-GABPa-ChIP-Seq(GSE17954)/Homer/RACCGGAAGT	1	1
57	Gata1(Zf)/K562-GATA1-ChIP-Seq(GSE18829)/Homer/SAGATAAGRV	1	1
59	Gata4(Zf)/Heart-Gata4-ChIP-Seq(GSE35151)/Homer/NBWGATAAGR	1	1
62	Gfi1b(Zf)/HPC7-Gfi1b-ChIP-Seq(GSE22178)/Homer/MAATCACTGC	1	1
64	GFY(?)/Promoter/Homer/ACTACAATTCCC	1	1
65	GFY-Staf(?,Zf)/Promoter/Homer/RACTACAATTCCCAGAAKGC	1	1
67	IRF2(IRF)/Erythroblas-IRF2-ChIP-Seq(GSE36985)/Homer/GAAASYGAAASY	1	1
70	Jun-AP1(bZIP)/K562-cJun-ChIP-Seq(GSE31477)/Homer/GATGASTCATCN	1	1
71	JunB(bZIP)/DendriticCells-Junb-ChIP-Seq(GSE36099)/Homer/RATGASTCAT	1	1
72	JunD(bZIP)/K562-JunD-ChIP-Seq/Homer/ATGACGTCATCN	1	1
73	KLF10(Zf)/HEK293-KLF10.GFP-ChIP-Seq(GSE58341)/Homer/GGGGGTGTGTCC	1	1
74	KLF14(Zf)/HEK293-KLF14.GFP-ChIP-Seq(GSE58341)/Homer/RGKGGGCGKGGC	1	1
75	KLF3(Zf)/MEF-Klf3-ChIP-Seq(GSE44748)/Homer/NRGCCCCRCCCHBNN	1	1
76	Klf4(Zf)/mES-Klf4-ChIP-Seq(GSE11431)/Homer/GCCACACCCA	1	1
77	KLF5(Zf)/LoVo-KLF5-ChIP-Seq(GSE49402)/Homer/DGGGYGKGGC	1	1
78	KLF6(Zf)/PDAC-KLF6-ChIP-Seq(GSE64557)/Homer/MKGGGYGTGGCC	1	1
79	Klf9(Zf)/GBM-Klf9-ChIP-Seq(GSE62211)/Homer/GCCACRCCCACY	1	1
84	Max(bHLH)/K562-Max-ChIP-Seq(GSE31477)/Homer/RCCACGTGGYYN	1	1
85	Maz(Zf)/HepG2-Maz-ChIP-Seq(GSE31477)/Homer/GGGGGGGG	1	1
86	MITF(bHLH)/MastCells-MITF-ChIP-Seq(GSE48085)/Homer/RTCATGTGAC	1	1
91	NF-E2(bZIP)/K562-NFE2-ChIP-Seq(GSE31477)/Homer/GATGACTCAGCA	1	1
92	NFY(CCAAT)/Promoter/Homer/RGCCAATSRG	1	1
93	n-Myc(bHLH)/mES-nMyc-ChIP-Seq(GSE11431)/Homer/VRCCACGTGG	1	1
94	NRF1(NRF)/MCF7-NRF1-ChIP-Seq(Unpublished)/Homer/CTGCGCATGCGC	1	1
95	Nrf2(bZIP)/Lymphoblast-Nrf2-ChIP-Seq(GSE37589)/Homer/HTGCTGAGTCAT	1	1
96	NRF(NRF)/Promoter/Homer/STGCGCATGCGC	1	1
103	Pbx3(Homeobox)/GM12878-PBX3-ChIP-Seq(GSE32465)/Homer/SCTGTCAMTCAN	1	1
105	Pknox1(Homeobox)/ES-Prep1-ChIP-Seq(GSE63282)/Homer/SCTGTCAVTCAV	1	1
106	PU.1(ETS)/ThioMac-PU.1-ChIP-Seq(GSE21512)/Homer/AGAGGAAGTG	1	1
108	PU.1-IRF(ETS:IRF)/Bcell-PU.1-ChIP-Seq(GSE21512)/Homer/MGGAAGTGAAAC	1	1
114	Ronin(THAP)/ES-Thap11-ChIP-Seq(GSE51522)/Homer/RACTACAACTCCCAGVAKGC	1	1
115	RUNX1(Runt)/Jurkat-RUNX1-ChIP-Seq(GSE29180)/Homer/AAACCACARM	1	1
116	RUNX2(Runt)/PCa-RUNX2-ChIP-Seq(GSE33889)/Homer/NWAACCACADNN	1	1
117	RUNX-AML(Runt)/CD4+-PolII-ChIP-Seq(Barski_et_al.)/Homer/GCTGTGGTTW	1	1
118	RUNX(Runt)/HPC7-Runx1-ChIP-Seq(GSE22178)/Homer/SAAACCACAG	1	1
121	Sp1(Zf)/Promoter/Homer/GGCCCCGCCCCC	1	1
122	Sp5(Zf)/mES-Sp5.Flag-ChIP-Seq(GSE72989)/Homer/RGKGGGCGGAGC	1	1
123	SPDEF(ETS)/VCaP-SPDEF-ChIP-Seq(SRA014231)/Homer/ASWTCCTGBT	1	1
124	SpiB(ETS)/OCILY3-SPIB-ChIP-Seq(GSE56857)/Homer/AAAGRGGAAGTG	1	1
128	Stat3(Stat)/mES-Stat3-ChIP-Seq(GSE11431)/Homer/CTTCCGGGAA	1	1
130	TFE3(bHLH)/MEF-TFE3-ChIP-Seq(GSE75757)/Homer/GTCACGTGACYV	1	1
131	USF1(bHLH)/GM12878-Usf1-ChIP-Seq(GSE32465)/Homer/SGTCACGTGR	1	1
132	Usf2(bHLH)/C2C12-Usf2-ChIP-Seq(GSE36030)/Homer/GTCACGTGGT	1	1
135	ZBTB33(Zf)/GM12878-ZBTB33-ChIP-Seq(GSE32465)/Homer/GGVTCTCGCGAGAAC	1	1
136	Zfp281(Zf)/ES-Zfp281-ChIP-Seq(GSE81042)/Homer/CCCCTCCCCCAC	1	1
137	ZNF143|STAF(Zf)/CUTLL-ZNF143-ChIP-Seq(GSE29600)/Homer/ATTTCCCAGVAKSCY	1	1
1	AMYB(HTH)/Testes-AMYB-ChIP-Seq(GSE44588)/Homer/TGGCAGTTGG	0	1
3	Arnt:Ahr(bHLH)/MCF7-Arnt-ChIP-Seq(Lo_et_al.)/Homer/TBGCACGCAA	0	1
5	Atf2(bZIP)/3T3L1-Atf2-ChIP-Seq(GSE56872)/Homer/NRRTGACGTCAT	0	1
7	Atf4(bZIP)/MEF-Atf4-ChIP-Seq(GSE35681)/Homer/MTGATGCAAT	0	1
8	Atf7(bZIP)/3T3L1-Atf7-ChIP-Seq(GSE56872)/Homer/NGRTGACGTCAY	0	1
9	Bach1(bZIP)/K562-Bach1-ChIP-Seq(GSE31477)/Homer/AWWNTGCTGAGTCAT	0	1
13	BMYB(HTH)/Hela-BMYB-ChIP-Seq(GSE27030)/Homer/NHAACBGYYV	0	1
14	BORIS(Zf)/K562-CTCFL-ChIP-Seq(GSE32465)/Homer/CNNBRGCGCCCCCTGSTGGC	0	1
15	CEBP:AP1(bZIP)/ThioMac-CEBPb-ChIP-Seq(GSE21512)/Homer/DRTGTTGCAA	0	1
16	CEBP(bZIP)/ThioMac-CEBPb-ChIP-Seq(GSE21512)/Homer/ATTGCGCAAC	0	1
17	Chop(bZIP)/MEF-Chop-ChIP-Seq(GSE35681)/Homer/ATTGCATCAT	0	1
18	c-Jun-CRE(bZIP)/K562-cJun-ChIP-Seq(GSE31477)/Homer/ATGACGTCATCY	0	1
21	c-Myc(bHLH)/mES-cMyc-ChIP-Seq(GSE11431)/Homer/VVCCACGTGG	0	1
24	CTCF-SatelliteElement(Zf?)/CD4+-CTCF-ChIP-Seq(Barski_et_al.)/Homer/TGCAGTTCCMVNWRTGGCCA	0	1
25	CTCF(Zf)/CD4+-CTCF-ChIP-Seq(Barski_et_al.)/Homer/AYAGTGCCMYCTRGTGGCCA	0	1
26	E2F1(E2F)/Hela-E2F1-ChIP-Seq(GSE22478)/Homer/CWGGCGGGAA	0	1
63	GFX(?)/Promoter/Homer/ATTCTCGCGAGA	0	1
66	HLF(bZIP)/HSC-HLF.Flag-ChIP-Seq(GSE69817)/Homer/RTTATGYAAB	0	1
68	IRF3(IRF)/BMDM-Irf3-ChIP-Seq(GSE67343)/Homer/AGTTTCAKTTTC	0	1
69	IRF8(IRF)/BMDM-IRF8-ChIP-Seq(GSE77884)/Homer/GRAASTGAAAST	0	1
81	MafA(bZIP)/Islet-MafA-ChIP-Seq(GSE30298)/Homer/TGCTGACTCA	0	1
82	MafB(bZIP)/BMM-Mafb-ChIP-Seq(GSE75722)/Homer/WNTGCTGASTCAGCANWTTY	0	1
83	MafK(bZIP)/C2C12-MafK-ChIP-Seq(GSE36030)/Homer/GCTGASTCAGCA	0	1
87	MYB(HTH)/ERMYB-Myb-ChIPSeq(GSE22095)/Homer/GGCVGTTR	0	1
88	Nanog(Homeobox)/mES-Nanog-ChIP-Seq(GSE11724)/Homer/RGCCATTAAC	0	1
89	NF1(CTF)/LNCAP-NF1-ChIP-Seq(Unpublished)/Homer/CYTGGCABNSTGCCAR	0	1
90	NF1-halfsite(CTF)/LNCaP-NF1-ChIP-Seq(Unpublished)/Homer/YTGCCAAG	0	1
97	p53(p53)/mES-cMyc-ChIP-Seq(GSE11431)/Homer/ACATGCCCGGGCAT	0	1
98	p53(p53)/Saos-p53-ChIP-Seq(GSE15780)/Homer/RRCATGYCYRGRCATGYYYN	0	1
99	p53(p53)/Saos-p53-ChIP-Seq/Homer/RRCATGYCYRGRCATGYYYN	0	1
100	p73(p53)/Trachea-p73-ChIP-Seq(PRJNA310161)/Homer/NRRRCAWGTCCDGRCATGYY	0	1
102	PBX1(Homeobox)/MCF7-PBX1-ChIP-Seq(GSE28007)/Homer/GSCTGTCACTCA	0	1
107	PU.1:IRF8(ETS:IRF)/pDC-Irf8-ChIP-Seq(GSE66899)/Homer/GGAAGTGAAAST	0	1
109	Rfx1(HTH)/NPC-H3K4me1-ChIP-Seq(GSE16256)/Homer/KGTTGCCATGGCAA	0	1
110	Rfx2(HTH)/LoVo-RFX2-ChIP-Seq(GSE49402)/Homer/GTTGCCATGGCAACM	0	1
111	Rfx5(HTH)/GM12878-Rfx5-ChIP-Seq(GSE31477)/Homer/SCCTAGCAACAG	0	1
112	Rfx6(HTH)/Min6b1-Rfx6.HA-ChIP-Seq(GSE62844)/Homer/TGTTKCCTAGCAACM	0	1
113	RFX(HTH)/K562-RFX3-ChIP-Seq(SRA012198)/Homer/CGGTTGCCATGGCAAC	0	1
119	Smad3(MAD)/NPC-Smad3-ChIP-Seq(GSE36673)/Homer/TWGTCTGV	0	1
120	Smad4(MAD)/ESC-SMAD4-ChIP-Seq(GSE29422)/Homer/VBSYGTCTGG	0	1
125	Srebp1a(bHLH)/HepG2-Srebp1a-ChIP-Seq(GSE31477)/Homer/RTCACSCCAY	0	1
126	Srebp2(bHLH)/HepG2-Srebp2-ChIP-Seq(GSE31477)/Homer/CGGTCACSCCAC	0	1
127	Stat3+il21(Stat)/CD4-Stat3-ChIP-Seq(GSE19198)/Homer/SVYTTCCNGGAARB	0	1
129	STAT4(Stat)/CD4-Stat4-ChIP-Seq(GSE22104)/Homer/NYTTCCWGGAAR	0	1
133	X-box(HTH)/NPC-H3K4me1-ChIP-Seq(GSE16256)/Homer/GGTTGCCATGGCAA	0	1
134	YY1(Zf)/Promoter/Homer/CAAGATGGCGGC	0	1
138	ZNF264(Zf)/HEK293-ZNF264.GFP-ChIP-Seq(GSE58341)/Homer/RGGGCACTAACY	0	1
139	ZNF467(Zf)/HEK293-ZNF467.GFP-ChIP-Seq(GSE58341)/Homer/TGGGGAAGGGCM	0	1
140	ZNF711(Zf)/SHSY5Y-ZNF711-ChIP-Seq(GSE20673)/Homer/AGGCCTAG	0	1
23	CRX(Homeobox)/Retina-Crx-ChIP-Seq(GSE20012)/Homer/GCTAATCC	1	0
58	Gata2(Zf)/K562-GATA2-ChIP-Seq(GSE18829)/Homer/BBCTTATCTS	1	0
60	Gata6(Zf)/HUG1N-GATA6-ChIP-Seq(GSE51936)/Homer/YCTTATCTBN	1	0
61	GATA:SCL(Zf,bHLH)/Ter119-SCL-ChIP-Seq(GSE18720)/Homer/CRGCTGBNGNSNNSAGATAA	1	0
80	Lhx3(Homeobox)/Neuron-Lhx3-ChIP-Seq(GSE31456)/Homer/ADBTAATTAR	1	0
101	PAX3:FKHR-fusion(Paired,Homeobox)/Rh4-PAX3:FKHR-ChIP-Seq(GSE19063)/Homer/ACCRTGACTAATTNN	1	0
104	Pdx1(Homeobox)/Islet-Pdx1-ChIP-Seq(SRA008281)/Homer/YCATYAATCA	1	0

## Sheet: 3a2_overlap_Motif
universe		A	B
1	AMYB(HTH)/Testes-AMYB-ChIP-Seq(GSE44588)/Homer/TGGCAGTTGG	1	1
2	AP-1(bZIP)/ThioMac-PU.1-ChIP-Seq(GSE21512)/Homer/VTGACTCATC	1	1
3	Arnt:Ahr(bHLH)/MCF7-Arnt-ChIP-Seq(Lo_et_al.)/Homer/TBGCACGCAA	0	1
4	Atf1(bZIP)/K562-ATF1-ChIP-Seq(GSE31477)/Homer/GATGACGTCA	1	1
5	Atf2(bZIP)/3T3L1-Atf2-ChIP-Seq(GSE56872)/Homer/NRRTGACGTCAT	1	1
6	Atf3(bZIP)/GBM-ATF3-ChIP-Seq(GSE33912)/Homer/DATGASTCATHN	1	1
7	Atf4(bZIP)/MEF-Atf4-ChIP-Seq(GSE35681)/Homer/MTGATGCAAT	1	0
8	Atf7(bZIP)/3T3L1-Atf7-ChIP-Seq(GSE56872)/Homer/NGRTGACGTCAY	1	1
9	Bach1(bZIP)/K562-Bach1-ChIP-Seq(GSE31477)/Homer/AWWNTGCTGAGTCAT	1	1
10	Bach2(bZIP)/OCILy7-Bach2-ChIP-Seq(GSE44420)/Homer/TGCTGAGTCA	1	1
11	BATF(bZIP)/Th17-BATF-ChIP-Seq(GSE39756)/Homer/DATGASTCAT	1	1
12	bHLHE40(bHLH)/HepG2-BHLHE40-ChIP-Seq(GSE31477)/Homer/KCACGTGMCN	1	1
13	BMAL1(bHLH)/Liver-Bmal1-ChIP-Seq(GSE39860)/Homer/GNCACGTG	0	1
14	BMYB(HTH)/Hela-BMYB-ChIP-Seq(GSE27030)/Homer/NHAACBGYYV	1	1
15	BORIS(Zf)/K562-CTCFL-ChIP-Seq(GSE32465)/Homer/CNNBRGCGCCCCCTGSTGGC	1	1
16	Brn1(POU,Homeobox)/NPC-Brn1-ChIP-Seq(GSE35496)/Homer/TATGCWAATBAV	1	0
17	CArG(MADS)/PUER-Srf-ChIP-Seq(Sullivan_et_al.)/Homer/CCATATATGGNM	1	0
18	CEBP:AP1(bZIP)/ThioMac-CEBPb-ChIP-Seq(GSE21512)/Homer/DRTGTTGCAA	0	1
19	CEBP(bZIP)/ThioMac-CEBPb-ChIP-Seq(GSE21512)/Homer/ATTGCGCAAC	1	1
20	Chop(bZIP)/MEF-Chop-ChIP-Seq(GSE35681)/Homer/ATTGCATCAT	0	1
21	c-Jun-CRE(bZIP)/K562-cJun-ChIP-Seq(GSE31477)/Homer/ATGACGTCATCY	1	1
22	CLOCK(bHLH)/Liver-Clock-ChIP-Seq(GSE39860)/Homer/GHCACGTG	1	1
23	c-Myc(bHLH)/LNCAP-cMyc-ChIP-Seq(Unpublished)/Homer/VCCACGTG	1	1
24	c-Myc(bHLH)/mES-cMyc-ChIP-Seq(GSE11431)/Homer/VVCCACGTGG	0	1
25	CRE(bZIP)/Promoter/Homer/CSGTGACGTCAC	1	1
26	CTCF(Zf)/CD4+-CTCF-ChIP-Seq(Barski_et_al.)/Homer/AYAGTGCCMYCTRGTGGCCA	1	1
27	E2F1(E2F)/Hela-E2F1-ChIP-Seq(GSE22478)/Homer/CWGGCGGGAA	1	1
28	E2F3(E2F)/MEF-E2F3-ChIP-Seq(GSE71376)/Homer/BTKGGCGGGAAA	1	1
29	E2F4(E2F)/K562-E2F4-ChIP-Seq(GSE31477)/Homer/GGCGGGAAAH	1	1
30	E2F6(E2F)/Hela-E2F6-ChIP-Seq(GSE31477)/Homer/GGCGGGAARN	1	1
31	E2F7(E2F)/Hela-E2F7-ChIP-Seq(GSE32673)/Homer/VDTTTCCCGCCA	1	1
32	E2F(E2F)/Hela-CellCycle-Expression/Homer/TTSGCGCGAAAA	1	1
33	E-box(bHLH)/Promoter/Homer/SSGGTCACGTGA	1	1
34	Egr1(Zf)/K562-Egr1-ChIP-Seq(GSE32465)/Homer/TGCGTGGGYG	1	1
35	Egr2(Zf)/Thymocytes-Egr2-ChIP-Seq(GSE34254)/Homer/NGCGTGGGCGGR	1	1
36	EHF(ETS)/LoVo-EHF-ChIP-Seq(GSE49402)/Homer/AVCAGGAAGT	1	1
37	EKLF(Zf)/Erythrocyte-Klf1-ChIP-Seq(GSE20478)/Homer/NWGGGTGTGGCY	1	1
38	ELF1(ETS)/Jurkat-ELF1-ChIP-Seq(SRA014231)/Homer/AVCCGGAAGT	1	1
39	ELF3(ETS)/PDAC-ELF3-ChIP-Seq(GSE64557)/Homer/ANCAGGAAGT	1	1
40	ELF5(ETS)/T47D-ELF5-ChIP-Seq(GSE30407)/Homer/ACVAGGAAGT	1	1
41	Elk1(ETS)/Hela-Elk1-ChIP-Seq(GSE31477)/Homer/HACTTCCGGY	1	1
42	Elk4(ETS)/Hela-Elk4-ChIP-Seq(GSE31477)/Homer/NRYTTCCGGY	1	1
43	ERG(ETS)/VCaP-ERG-ChIP-Seq(GSE14097)/Homer/ACAGGAAGTG	1	1
44	Ets1-distal(ETS)/CD4+-PolII-ChIP-Seq(Barski_et_al.)/Homer/MACAGGAAGT	1	1
45	ETS1(ETS)/Jurkat-ETS1-ChIP-Seq(GSE17954)/Homer/ACAGGAAGTG	1	1
46	ETS:E-box(ETS,bHLH)/HPC7-Scl-ChIP-Seq(GSE22178)/Homer/AGGAARCAGCTG	1	1
47	ETS(ETS)/Promoter/Homer/AACCGGAAGT	1	1
48	ETS:RUNX(ETS,Runt)/Jurkat-RUNX1-ChIP-Seq(GSE17954)/Homer/RCAGGATGTGGT	1	1
49	ETV1(ETS)/GIST48-ETV1-ChIP-Seq(GSE22441)/Homer/AACCGGAAGT	1	1
50	Etv2(ETS)/ES-ER71-ChIP-Seq(GSE59402)/Homer(0.967)/NNAYTTCCTGHN	1	1
51	EWS:ERG-fusion(ETS)/CADO_ES1-EWS:ERG-ChIP-Seq(SRA014231)/Homer/ATTTCCTGTN	1	1
52	EWS:FLI1-fusion(ETS)/SK_N_MC-EWS:FLI1-ChIP-Seq(SRA014231)/Homer/VACAGGAAAT	1	1
53	Fli1(ETS)/CD8-FLI-ChIP-Seq(GSE20898)/Homer/NRYTTCCGGH	1	1
54	Fosl2(bZIP)/3T3L1-Fosl2-ChIP-Seq(GSE56872)/Homer/NATGASTCABNN	1	1
55	FOXK2(Forkhead)/U2OS-FOXK2-ChIP-Seq(E-MTAB-2204)/Homer/SCHTGTTTACAT	0	1
56	Foxo1(Forkhead)/RAW-Foxo1-ChIP-Seq(Fan_et_al.)/Homer/CTGTTTAC	1	1
57	FOXP1(Forkhead)/H9-FOXP1-ChIP-Seq(GSE31006)/Homer/NYYTGTTTACHN	0	1
58	Fra1(bZIP)/BT549-Fra1-ChIP-Seq(GSE46166)/Homer/NNATGASTCATH	1	1
59	Fra2(bZIP)/Striatum-Fra2-ChIP-Seq(GSE43429)/Homer/GGATGACTCATC	1	1
60	GABPA(ETS)/Jurkat-GABPa-ChIP-Seq(GSE17954)/Homer/RACCGGAAGT	1	1
61	Gata1(Zf)/K562-GATA1-ChIP-Seq(GSE18829)/Homer/SAGATAAGRV	1	1
62	Gata2(Zf)/K562-GATA2-ChIP-Seq(GSE18829)/Homer/BBCTTATCTS	1	1
63	GATA3(Zf)/iTreg-Gata3-ChIP-Seq(GSE20898)/Homer/AGATAASR	1	1
64	Gata4(Zf)/Heart-Gata4-ChIP-Seq(GSE35151)/Homer/NBWGATAAGR	1	1
65	Gata6(Zf)/HUG1N-GATA6-ChIP-Seq(GSE51936)/Homer/YCTTATCTBN	1	1
66	GATA:SCL(Zf,bHLH)/Ter119-SCL-ChIP-Seq(GSE18720)/Homer/CRGCTGBNGNSNNSAGATAA	1	1
67	Gfi1b(Zf)/HPC7-Gfi1b-ChIP-Seq(GSE22178)/Homer/MAATCACTGC	1	1
68	GFX(?)/Promoter/Homer/ATTCTCGCGAGA	1	1
69	GFY(?)/Promoter/Homer/ACTACAATTCCC	1	1
70	GFY-Staf(?,Zf)/Promoter/Homer/RACTACAATTCCCAGAAKGC	1	1
71	HIF-1b(HLH)/T47D-HIF1b-ChIP-Seq(GSE59937)/Homer/RTACGTGC	0	1
72	HLF(bZIP)/HSC-HLF.Flag-ChIP-Seq(GSE69817)/Homer/RTTATGYAAB	1	0
73	IRF2(IRF)/Erythroblas-IRF2-ChIP-Seq(GSE36985)/Homer/GAAASYGAAASY	0	1
74	IRF3(IRF)/BMDM-Irf3-ChIP-Seq(GSE67343)/Homer/AGTTTCAKTTTC	0	1
75	IRF8(IRF)/BMDM-IRF8-ChIP-Seq(GSE77884)/Homer/GRAASTGAAAST	1	1
76	Jun-AP1(bZIP)/K562-cJun-ChIP-Seq(GSE31477)/Homer/GATGASTCATCN	1	1
77	JunB(bZIP)/DendriticCells-Junb-ChIP-Seq(GSE36099)/Homer/RATGASTCAT	1	1
78	JunD(bZIP)/K562-JunD-ChIP-Seq/Homer/ATGACGTCATCN	1	1
79	KLF10(Zf)/HEK293-KLF10.GFP-ChIP-Seq(GSE58341)/Homer/GGGGGTGTGTCC	1	1
80	KLF14(Zf)/HEK293-KLF14.GFP-ChIP-Seq(GSE58341)/Homer/RGKGGGCGKGGC	1	1
81	KLF3(Zf)/MEF-Klf3-ChIP-Seq(GSE44748)/Homer/NRGCCCCRCCCHBNN	1	1
82	Klf4(Zf)/mES-Klf4-ChIP-Seq(GSE11431)/Homer/GCCACACCCA	1	1
83	KLF5(Zf)/LoVo-KLF5-ChIP-Seq(GSE49402)/Homer/DGGGYGKGGC	1	1
84	KLF6(Zf)/PDAC-KLF6-ChIP-Seq(GSE64557)/Homer/MKGGGYGTGGCC	1	1
85	Klf9(Zf)/GBM-Klf9-ChIP-Seq(GSE62211)/Homer/GCCACRCCCACY	1	1
86	Lhx3(Homeobox)/Neuron-Lhx3-ChIP-Seq(GSE31456)/Homer/ADBTAATTAR	1	1
87	MafA(bZIP)/Islet-MafA-ChIP-Seq(GSE30298)/Homer/TGCTGACTCA	1	1
88	MafB(bZIP)/BMM-Mafb-ChIP-Seq(GSE75722)/Homer/WNTGCTGASTCAGCANWTTY	1	1
89	MafF(bZIP)/HepG2-MafF-ChIP-Seq(GSE31477)/Homer/HWWGTCAGCAWWTTT	1	0
90	MafK(bZIP)/C2C12-MafK-ChIP-Seq(GSE36030)/Homer/GCTGASTCAGCA	1	1
91	Max(bHLH)/K562-Max-ChIP-Seq(GSE31477)/Homer/RCCACGTGGYYN	1	1
92	Maz(Zf)/HepG2-Maz-ChIP-Seq(GSE31477)/Homer/GGGGGGGG	1	1
93	Meis1(Homeobox)/MastCells-Meis1-ChIP-Seq(GSE48085)/Homer/VGCTGWCAVB	1	0
94	MITF(bHLH)/MastCells-MITF-ChIP-Seq(GSE48085)/Homer/RTCATGTGAC	1	1
95	MYB(HTH)/ERMYB-Myb-ChIPSeq(GSE22095)/Homer/GGCVGTTR	1	1
96	Nanog(Homeobox)/mES-Nanog-ChIP-Seq(GSE11724)/Homer/RGCCATTAAC	1	1
97	NF1(CTF)/LNCAP-NF1-ChIP-Seq(Unpublished)/Homer/CYTGGCABNSTGCCAR	1	1
98	NF-E2(bZIP)/K562-NFE2-ChIP-Seq(GSE31477)/Homer/GATGACTCAGCA	1	1
99	NFY(CCAAT)/Promoter/Homer/RGCCAATSRG	1	1
100	n-Myc(bHLH)/mES-nMyc-ChIP-Seq(GSE11431)/Homer/VRCCACGTGG	1	1
101	NPAS(bHLH)/Liver-NPAS-ChIP-Seq(GSE39860)/Homer/NVCACGTG	0	1
102	NRF1(NRF)/MCF7-NRF1-ChIP-Seq(Unpublished)/Homer/CTGCGCATGCGC	1	1
103	Nrf2(bZIP)/Lymphoblast-Nrf2-ChIP-Seq(GSE37589)/Homer/HTGCTGAGTCAT	1	1
104	NRF(NRF)/Promoter/Homer/STGCGCATGCGC	1	1
105	Oct4(POU,Homeobox)/mES-Oct4-ChIP-Seq(GSE11431)/Homer/ATTTGCATAW	0	1
106	PAX3:FKHR-fusion(Paired,Homeobox)/Rh4-PAX3:FKHR-ChIP-Seq(GSE19063)/Homer/ACCRTGACTAATTNN	1	1
107	PAX5(Paired,Homeobox),condensed/GM12878-PAX5-ChIP-Seq(GSE32465)/Homer/GTCACGCTCSCTGM	0	1
108	PBX1(Homeobox)/MCF7-PBX1-ChIP-Seq(GSE28007)/Homer/GSCTGTCACTCA	1	1
109	Pbx3(Homeobox)/GM12878-PBX3-ChIP-Seq(GSE32465)/Homer/SCTGTCAMTCAN	1	1
110	Pknox1(Homeobox)/ES-Prep1-ChIP-Seq(GSE63282)/Homer/SCTGTCAVTCAV	1	1
111	PU.1(ETS)/ThioMac-PU.1-ChIP-Seq(GSE21512)/Homer/AGAGGAAGTG	1	1
112	PU.1:IRF8(ETS:IRF)/pDC-Irf8-ChIP-Seq(GSE66899)/Homer/GGAAGTGAAAST	1	1
113	PU.1-IRF(ETS:IRF)/Bcell-PU.1-ChIP-Seq(GSE21512)/Homer/MGGAAGTGAAAC	1	1
114	Rfx1(HTH)/NPC-H3K4me1-ChIP-Seq(GSE16256)/Homer/KGTTGCCATGGCAA	1	1
115	Rfx2(HTH)/LoVo-RFX2-ChIP-Seq(GSE49402)/Homer/GTTGCCATGGCAACM	1	1
116	Rfx5(HTH)/GM12878-Rfx5-ChIP-Seq(GSE31477)/Homer/SCCTAGCAACAG	1	1
117	Rfx6(HTH)/Min6b1-Rfx6.HA-ChIP-Seq(GSE62844)/Homer/TGTTKCCTAGCAACM	0	1
118	RFX(HTH)/K562-RFX3-ChIP-Seq(SRA012198)/Homer/CGGTTGCCATGGCAAC	1	1
119	Ronin(THAP)/ES-Thap11-ChIP-Seq(GSE51522)/Homer/RACTACAACTCCCAGVAKGC	1	1
120	RUNX1(Runt)/Jurkat-RUNX1-ChIP-Seq(GSE29180)/Homer/AAACCACARM	1	1
121	RUNX2(Runt)/PCa-RUNX2-ChIP-Seq(GSE33889)/Homer/NWAACCACADNN	1	1
122	RUNX-AML(Runt)/CD4+-PolII-ChIP-Seq(Barski_et_al.)/Homer/GCTGTGGTTW	1	1
123	RUNX(Runt)/HPC7-Runx1-ChIP-Seq(GSE22178)/Homer/SAAACCACAG	1	1
124	Smad2(MAD)/ES-SMAD2-ChIP-Seq(GSE29422)/Homer/CTGTCTGG	1	1
125	Smad3(MAD)/NPC-Smad3-ChIP-Seq(GSE36673)/Homer/TWGTCTGV	1	1
126	Smad4(MAD)/ESC-SMAD4-ChIP-Seq(GSE29422)/Homer/VBSYGTCTGG	1	1
127	Sp1(Zf)/Promoter/Homer/GGCCCCGCCCCC	1	1
128	Sp5(Zf)/mES-Sp5.Flag-ChIP-Seq(GSE72989)/Homer/RGKGGGCGGAGC	1	1
129	SPDEF(ETS)/VCaP-SPDEF-ChIP-Seq(SRA014231)/Homer/ASWTCCTGBT	1	1
130	SpiB(ETS)/OCILY3-SPIB-ChIP-Seq(GSE56857)/Homer/AAAGRGGAAGTG	1	1
131	Srebp1a(bHLH)/HepG2-Srebp1a-ChIP-Seq(GSE31477)/Homer/RTCACSCCAY	0	1
132	Srebp2(bHLH)/HepG2-Srebp2-ChIP-Seq(GSE31477)/Homer/CGGTCACSCCAC	1	0
133	STAT1(Stat)/HelaS3-STAT1-ChIP-Seq(GSE12782)/Homer/NATTTCCNGGAAAT	1	0
134	Stat3+il21(Stat)/CD4-Stat3-ChIP-Seq(GSE19198)/Homer/SVYTTCCNGGAARB	1	1
135	Stat3(Stat)/mES-Stat3-ChIP-Seq(GSE11431)/Homer/CTTCCGGGAA	1	1
136	STAT4(Stat)/CD4-Stat4-ChIP-Seq(GSE22104)/Homer/NYTTCCWGGAAR	1	0
137	STAT5(Stat)/mCD4+-Stat5-ChIP-Seq(GSE12346)/Homer/RTTTCTNAGAAA	1	0
138	Tbx20(T-box)/Heart-Tbx20-ChIP-Seq(GSE29636)/Homer/GGTGYTGACAGS	1	0
139	TFE3(bHLH)/MEF-TFE3-ChIP-Seq(GSE75757)/Homer/GTCACGTGACYV	1	1
140	Tlx?(NR)/NPC-H3K4me1-ChIP-Seq(GSE16256)/Homer/CTGGCAGSCTGCCA	0	1
141	USF1(bHLH)/GM12878-Usf1-ChIP-Seq(GSE32465)/Homer/SGTCACGTGR	1	1
142	Usf2(bHLH)/C2C12-Usf2-ChIP-Seq(GSE36030)/Homer/GTCACGTGGT	1	1
143	X-box(HTH)/NPC-H3K4me1-ChIP-Seq(GSE16256)/Homer/GGTTGCCATGGCAA	1	1
144	YY1(Zf)/Promoter/Homer/CAAGATGGCGGC	1	1
145	ZBTB33(Zf)/GM12878-ZBTB33-ChIP-Seq(GSE32465)/Homer/GGVTCTCGCGAGAAC	1	1
146	Zfp281(Zf)/ES-Zfp281-ChIP-Seq(GSE81042)/Homer/CCCCTCCCCCAC	1	1
147	ZNF143|STAF(Zf)/CUTLL-ZNF143-ChIP-Seq(GSE29600)/Homer/ATTTCCCAGVAKSCY	1	1
148	ZNF264(Zf)/HEK293-ZNF264.GFP-ChIP-Seq(GSE58341)/Homer/RGGGCACTAACY	1	1
149	ZNF382(Zf)/HEK293-ZNF382.GFP-ChIP-Seq(GSE58341)/Homer/GNCTGTASTRNTGBCTCHTT	0	1
150	ZNF467(Zf)/HEK293-ZNF467.GFP-ChIP-Seq(GSE58341)/Homer/TGGGGAAGGGCM	1	0
151	ZNF519(Zf)/HEK293-ZNF519.GFP-ChIP-Seq(GSE58341)/Homer/GAGSCCGAGC	0	1
152	ZNF675(Zf)/HEK293-ZNF675.GFP-ChIP-Seq(GSE58341)/Homer/ARGAGGMCAAAATGW	0	1
153	ZSCAN22(Zf)/HEK293-ZSCAN22.GFP-ChIP-Seq(GSE58341)/Homer/SMCAGTCWGAKGGAGGAGGC	0	1

## Sheet: 3a3_overlap_Motif
universe		A	B
1	AMYB(HTH)/Testes-AMYB-ChIP-Seq(GSE44588)/Homer/TGGCAGTTGG	1	0
2	AP-1(bZIP)/ThioMac-PU.1-ChIP-Seq(GSE21512)/Homer/VTGACTCATC	1	1
3	Atf1(bZIP)/K562-ATF1-ChIP-Seq(GSE31477)/Homer/GATGACGTCA	1	1
4	Atf2(bZIP)/3T3L1-Atf2-ChIP-Seq(GSE56872)/Homer/NRRTGACGTCAT	1	0
5	Atf3(bZIP)/GBM-ATF3-ChIP-Seq(GSE33912)/Homer/DATGASTCATHN	1	1
6	Atf7(bZIP)/3T3L1-Atf7-ChIP-Seq(GSE56872)/Homer/NGRTGACGTCAY	1	0
7	Bach1(bZIP)/K562-Bach1-ChIP-Seq(GSE31477)/Homer/AWWNTGCTGAGTCAT	1	0
8	Bach2(bZIP)/OCILy7-Bach2-ChIP-Seq(GSE44420)/Homer/TGCTGAGTCA	1	0
9	BATF(bZIP)/Th17-BATF-ChIP-Seq(GSE39756)/Homer/DATGASTCAT	1	1
10	bHLHE40(bHLH)/HepG2-BHLHE40-ChIP-Seq(GSE31477)/Homer/KCACGTGMCN	1	0
11	BMAL1(bHLH)/Liver-Bmal1-ChIP-Seq(GSE39860)/Homer/GNCACGTG	1	0
12	BMYB(HTH)/Hela-BMYB-ChIP-Seq(GSE27030)/Homer/NHAACBGYYV	1	0
13	BORIS(Zf)/K562-CTCFL-ChIP-Seq(GSE32465)/Homer/CNNBRGCGCCCCCTGSTGGC	1	1
14	Brn1(POU,Homeobox)/NPC-Brn1-ChIP-Seq(GSE35496)/Homer/TATGCWAATBAV	0	1
15	bZIP:IRF(bZIP,IRF)/Th17-BatF-ChIP-Seq(GSE39756)/Homer/NAGTTTCABTHTGACTNW	1	0
16	CEBP:AP1(bZIP)/ThioMac-CEBPb-ChIP-Seq(GSE21512)/Homer/DRTGTTGCAA	1	0
17	CEBP(bZIP)/ThioMac-CEBPb-ChIP-Seq(GSE21512)/Homer/ATTGCGCAAC	1	0
18	c-Jun-CRE(bZIP)/K562-cJun-ChIP-Seq(GSE31477)/Homer/ATGACGTCATCY	1	0
19	CLOCK(bHLH)/Liver-Clock-ChIP-Seq(GSE39860)/Homer/GHCACGTG	1	0
20	c-Myc(bHLH)/LNCAP-cMyc-ChIP-Seq(Unpublished)/Homer/VCCACGTG	1	0
21	CRE(bZIP)/Promoter/Homer/CSGTGACGTCAC	1	0
22	CRX(Homeobox)/Retina-Crx-ChIP-Seq(GSE20012)/Homer/GCTAATCC	1	0
23	CTCF-SatelliteElement(Zf?)/CD4+-CTCF-ChIP-Seq(Barski_et_al.)/Homer/TGCAGTTCCMVNWRTGGCCA	1	0
24	CTCF(Zf)/CD4+-CTCF-ChIP-Seq(Barski_et_al.)/Homer/AYAGTGCCMYCTRGTGGCCA	1	0
25	E2F1(E2F)/Hela-E2F1-ChIP-Seq(GSE22478)/Homer/CWGGCGGGAA	1	0
26	E2F3(E2F)/MEF-E2F3-ChIP-Seq(GSE71376)/Homer/BTKGGCGGGAAA	1	0
27	E2F4(E2F)/K562-E2F4-ChIP-Seq(GSE31477)/Homer/GGCGGGAAAH	1	0
28	E2F6(E2F)/Hela-E2F6-ChIP-Seq(GSE31477)/Homer/GGCGGGAARN	1	0
29	E2F7(E2F)/Hela-E2F7-ChIP-Seq(GSE32673)/Homer/VDTTTCCCGCCA	1	0
30	E2F(E2F)/Hela-CellCycle-Expression/Homer/TTSGCGCGAAAA	1	0
31	E-box(bHLH)/Promoter/Homer/SSGGTCACGTGA	1	0
32	Egr1(Zf)/K562-Egr1-ChIP-Seq(GSE32465)/Homer/TGCGTGGGYG	1	0
33	Egr2(Zf)/Thymocytes-Egr2-ChIP-Seq(GSE34254)/Homer/NGCGTGGGCGGR	1	0
34	EHF(ETS)/LoVo-EHF-ChIP-Seq(GSE49402)/Homer/AVCAGGAAGT	1	1
35	EKLF(Zf)/Erythrocyte-Klf1-ChIP-Seq(GSE20478)/Homer/NWGGGTGTGGCY	1	1
36	ELF1(ETS)/Jurkat-ELF1-ChIP-Seq(SRA014231)/Homer/AVCCGGAAGT	1	1
37	ELF3(ETS)/PDAC-ELF3-ChIP-Seq(GSE64557)/Homer/ANCAGGAAGT	1	1
38	ELF5(ETS)/T47D-ELF5-ChIP-Seq(GSE30407)/Homer/ACVAGGAAGT	1	1
39	Elk1(ETS)/Hela-Elk1-ChIP-Seq(GSE31477)/Homer/HACTTCCGGY	1	1
40	Elk4(ETS)/Hela-Elk4-ChIP-Seq(GSE31477)/Homer/NRYTTCCGGY	1	1
41	ERG(ETS)/VCaP-ERG-ChIP-Seq(GSE14097)/Homer/ACAGGAAGTG	1	1
42	Ets1-distal(ETS)/CD4+-PolII-ChIP-Seq(Barski_et_al.)/Homer/MACAGGAAGT	1	1
43	ETS1(ETS)/Jurkat-ETS1-ChIP-Seq(GSE17954)/Homer/ACAGGAAGTG	1	1
44	ETS:E-box(ETS,bHLH)/HPC7-Scl-ChIP-Seq(GSE22178)/Homer/AGGAARCAGCTG	1	0
45	ETS(ETS)/Promoter/Homer/AACCGGAAGT	1	1
46	ETS:RUNX(ETS,Runt)/Jurkat-RUNX1-ChIP-Seq(GSE17954)/Homer/RCAGGATGTGGT	1	1
47	ETV1(ETS)/GIST48-ETV1-ChIP-Seq(GSE22441)/Homer/AACCGGAAGT	1	1
48	Etv2(ETS)/ES-ER71-ChIP-Seq(GSE59402)/Homer(0.967)/NNAYTTCCTGHN	1	1
49	EWS:ERG-fusion(ETS)/CADO_ES1-EWS:ERG-ChIP-Seq(SRA014231)/Homer/ATTTCCTGTN	1	1
50	EWS:FLI1-fusion(ETS)/SK_N_MC-EWS:FLI1-ChIP-Seq(SRA014231)/Homer/VACAGGAAAT	1	1
51	Fli1(ETS)/CD8-FLI-ChIP-Seq(GSE20898)/Homer/NRYTTCCGGH	1	1
52	Fosl2(bZIP)/3T3L1-Fosl2-ChIP-Seq(GSE56872)/Homer/NATGASTCABNN	1	1
53	Foxh1(Forkhead)/hESC-FOXH1-ChIP-Seq(GSE29422)/Homer/NNTGTGGATTSS	1	0
54	FOXK2(Forkhead)/U2OS-FOXK2-ChIP-Seq(E-MTAB-2204)/Homer/SCHTGTTTACAT	1	0
55	Foxo1(Forkhead)/RAW-Foxo1-ChIP-Seq(Fan_et_al.)/Homer/CTGTTTAC	1	0
56	Fra1(bZIP)/BT549-Fra1-ChIP-Seq(GSE46166)/Homer/NNATGASTCATH	1	1
57	Fra2(bZIP)/Striatum-Fra2-ChIP-Seq(GSE43429)/Homer/GGATGACTCATC	1	1
58	GABPA(ETS)/Jurkat-GABPa-ChIP-Seq(GSE17954)/Homer/RACCGGAAGT	1	1
59	Gata1(Zf)/K562-GATA1-ChIP-Seq(GSE18829)/Homer/SAGATAAGRV	1	0
60	Gata2(Zf)/K562-GATA2-ChIP-Seq(GSE18829)/Homer/BBCTTATCTS	1	0
61	Gata4(Zf)/Heart-Gata4-ChIP-Seq(GSE35151)/Homer/NBWGATAAGR	1	0
62	Gata6(Zf)/HUG1N-GATA6-ChIP-Seq(GSE51936)/Homer/YCTTATCTBN	1	0
63	GATA:SCL(Zf,bHLH)/Ter119-SCL-ChIP-Seq(GSE18720)/Homer/CRGCTGBNGNSNNSAGATAA	1	0
64	Gfi1b(Zf)/HPC7-Gfi1b-ChIP-Seq(GSE22178)/Homer/MAATCACTGC	1	0
65	GFX(?)/Promoter/Homer/ATTCTCGCGAGA	1	0
66	GFY(?)/Promoter/Homer/ACTACAATTCCC	1	0
67	GFY-Staf(?,Zf)/Promoter/Homer/RACTACAATTCCCAGAAKGC	1	0
68	HLF(bZIP)/HSC-HLF.Flag-ChIP-Seq(GSE69817)/Homer/RTTATGYAAB	1	0
69	HOXA9(Homeobox)/HSC-Hoxa9-ChIP-Seq(GSE33509)/Homer/GGCCATAAATCA	1	0
70	HOXB13(Homeobox)/ProstateTumor-HOXB13-ChIP-Seq(GSE56288)/Homer/TTTTATKRGG	1	0
71	Hoxc9(Homeobox)/Ainv15-Hoxc9-ChIP-Seq(GSE21812)/Homer/GGCCATAAATCA	1	0
72	HRE(HSF)/HepG2-HSF1-ChIP-Seq(GSE31477)/Homer/BSTTCTRGAABVTTCYAGAA	1	0
73	IRF2(IRF)/Erythroblas-IRF2-ChIP-Seq(GSE36985)/Homer/GAAASYGAAASY	1	0
74	IRF3(IRF)/BMDM-Irf3-ChIP-Seq(GSE67343)/Homer/AGTTTCAKTTTC	1	0
75	IRF4(IRF)/GM12878-IRF4-ChIP-Seq(GSE32465)/Homer/ACTGAAACCA	1	0
76	IRF8(IRF)/BMDM-IRF8-ChIP-Seq(GSE77884)/Homer/GRAASTGAAAST	1	0
77	Jun-AP1(bZIP)/K562-cJun-ChIP-Seq(GSE31477)/Homer/GATGASTCATCN	1	1
78	JunB(bZIP)/DendriticCells-Junb-ChIP-Seq(GSE36099)/Homer/RATGASTCAT	1	1
79	JunD(bZIP)/K562-JunD-ChIP-Seq/Homer/ATGACGTCATCN	1	0
80	KLF10(Zf)/HEK293-KLF10.GFP-ChIP-Seq(GSE58341)/Homer/GGGGGTGTGTCC	1	1
81	KLF14(Zf)/HEK293-KLF14.GFP-ChIP-Seq(GSE58341)/Homer/RGKGGGCGKGGC	1	1
82	KLF3(Zf)/MEF-Klf3-ChIP-Seq(GSE44748)/Homer/NRGCCCCRCCCHBNN	1	1
83	Klf4(Zf)/mES-Klf4-ChIP-Seq(GSE11431)/Homer/GCCACACCCA	1	1
84	KLF5(Zf)/LoVo-KLF5-ChIP-Seq(GSE49402)/Homer/DGGGYGKGGC	1	1
85	KLF6(Zf)/PDAC-KLF6-ChIP-Seq(GSE64557)/Homer/MKGGGYGTGGCC	1	1
86	Klf9(Zf)/GBM-Klf9-ChIP-Seq(GSE62211)/Homer/GCCACRCCCACY	1	1
87	Lhx3(Homeobox)/Neuron-Lhx3-ChIP-Seq(GSE31456)/Homer/ADBTAATTAR	1	0
88	MafB(bZIP)/BMM-Mafb-ChIP-Seq(GSE75722)/Homer/WNTGCTGASTCAGCANWTTY	1	0
89	MafK(bZIP)/C2C12-MafK-ChIP-Seq(GSE36030)/Homer/GCTGASTCAGCA	1	0
90	Max(bHLH)/K562-Max-ChIP-Seq(GSE31477)/Homer/RCCACGTGGYYN	1	0
91	Maz(Zf)/HepG2-Maz-ChIP-Seq(GSE31477)/Homer/GGGGGGGG	1	0
92	MITF(bHLH)/MastCells-MITF-ChIP-Seq(GSE48085)/Homer/RTCATGTGAC	1	0
93	MYB(HTH)/ERMYB-Myb-ChIPSeq(GSE22095)/Homer/GGCVGTTR	1	0
94	Nanog(Homeobox)/mES-Nanog-ChIP-Seq(GSE11724)/Homer/RGCCATTAAC	1	0
95	NF1(CTF)/LNCAP-NF1-ChIP-Seq(Unpublished)/Homer/CYTGGCABNSTGCCAR	1	0
96	NF-E2(bZIP)/K562-NFE2-ChIP-Seq(GSE31477)/Homer/GATGACTCAGCA	1	1
97	NFY(CCAAT)/Promoter/Homer/RGCCAATSRG	1	1
98	n-Myc(bHLH)/mES-nMyc-ChIP-Seq(GSE11431)/Homer/VRCCACGTGG	1	0
99	NPAS(bHLH)/Liver-NPAS-ChIP-Seq(GSE39860)/Homer/NVCACGTG	1	0
100	NRF1(NRF)/MCF7-NRF1-ChIP-Seq(Unpublished)/Homer/CTGCGCATGCGC	1	0
101	Nrf2(bZIP)/Lymphoblast-Nrf2-ChIP-Seq(GSE37589)/Homer/HTGCTGAGTCAT	1	1
102	NRF(NRF)/Promoter/Homer/STGCGCATGCGC	1	0
103	Oct2(POU,Homeobox)/Bcell-Oct2-ChIP-Seq(GSE21512)/Homer/ATATGCAAAT	0	1
104	PAX5(Paired,Homeobox),condensed/GM12878-PAX5-ChIP-Seq(GSE32465)/Homer/GTCACGCTCSCTGM	1	0
105	PBX1(Homeobox)/MCF7-PBX1-ChIP-Seq(GSE28007)/Homer/GSCTGTCACTCA	1	0
106	Pbx3(Homeobox)/GM12878-PBX3-ChIP-Seq(GSE32465)/Homer/SCTGTCAMTCAN	1	0
107	Pknox1(Homeobox)/ES-Prep1-ChIP-Seq(GSE63282)/Homer/SCTGTCAVTCAV	1	0
108	PRDM1(Zf)/Hela-PRDM1-ChIP-Seq(GSE31477)/Homer/ACTTTCACTTTC	1	0
109	PU.1(ETS)/ThioMac-PU.1-ChIP-Seq(GSE21512)/Homer/AGAGGAAGTG	1	1
110	PU.1:IRF8(ETS:IRF)/pDC-Irf8-ChIP-Seq(GSE66899)/Homer/GGAAGTGAAAST	1	0
111	PU.1-IRF(ETS:IRF)/Bcell-PU.1-ChIP-Seq(GSE21512)/Homer/MGGAAGTGAAAC	1	0
112	Rfx1(HTH)/NPC-H3K4me1-ChIP-Seq(GSE16256)/Homer/KGTTGCCATGGCAA	1	0
113	Rfx2(HTH)/LoVo-RFX2-ChIP-Seq(GSE49402)/Homer/GTTGCCATGGCAACM	1	0
114	Rfx5(HTH)/GM12878-Rfx5-ChIP-Seq(GSE31477)/Homer/SCCTAGCAACAG	1	1
115	Rfx6(HTH)/Min6b1-Rfx6.HA-ChIP-Seq(GSE62844)/Homer/TGTTKCCTAGCAACM	1	0
116	RFX(HTH)/K562-RFX3-ChIP-Seq(SRA012198)/Homer/CGGTTGCCATGGCAAC	1	0
117	Ronin(THAP)/ES-Thap11-ChIP-Seq(GSE51522)/Homer/RACTACAACTCCCAGVAKGC	1	0
118	RUNX1(Runt)/Jurkat-RUNX1-ChIP-Seq(GSE29180)/Homer/AAACCACARM	1	1
119	RUNX2(Runt)/PCa-RUNX2-ChIP-Seq(GSE33889)/Homer/NWAACCACADNN	1	1
120	RUNX-AML(Runt)/CD4+-PolII-ChIP-Seq(Barski_et_al.)/Homer/GCTGTGGTTW	1	1
121	RUNX(Runt)/HPC7-Runx1-ChIP-Seq(GSE22178)/Homer/SAAACCACAG	1	1
122	Six1(Homeobox)/Myoblast-Six1-ChIP-Chip(GSE20150)/Homer/GKVTCADRTTWC	1	0
123	Smad3(MAD)/NPC-Smad3-ChIP-Seq(GSE36673)/Homer/TWGTCTGV	1	0
124	Sp1(Zf)/Promoter/Homer/GGCCCCGCCCCC	1	1
125	Sp5(Zf)/mES-Sp5.Flag-ChIP-Seq(GSE72989)/Homer/RGKGGGCGGAGC	1	1
126	SPDEF(ETS)/VCaP-SPDEF-ChIP-Seq(SRA014231)/Homer/ASWTCCTGBT	1	0
127	SpiB(ETS)/OCILY3-SPIB-ChIP-Seq(GSE56857)/Homer/AAAGRGGAAGTG	1	1
128	Stat3+il21(Stat)/CD4-Stat3-ChIP-Seq(GSE19198)/Homer/SVYTTCCNGGAARB	1	1
129	Stat3(Stat)/mES-Stat3-ChIP-Seq(GSE11431)/Homer/CTTCCGGGAA	1	1
130	STAT4(Stat)/CD4-Stat4-ChIP-Seq(GSE22104)/Homer/NYTTCCWGGAAR	1	0
131	TFE3(bHLH)/MEF-TFE3-ChIP-Seq(GSE75757)/Homer/GTCACGTGACYV	1	0
132	Tgif2(Homeobox)/mES-Tgif2-ChIP-Seq(GSE55404)/Homer/TGTCANYT	0	1
133	Tlx?(NR)/NPC-H3K4me1-ChIP-Seq(GSE16256)/Homer/CTGGCAGSCTGCCA	1	0
134	USF1(bHLH)/GM12878-Usf1-ChIP-Seq(GSE32465)/Homer/SGTCACGTGR	1	0
135	Usf2(bHLH)/C2C12-Usf2-ChIP-Seq(GSE36030)/Homer/GTCACGTGGT	1	0
136	YY1(Zf)/Promoter/Homer/CAAGATGGCGGC	1	0
137	ZBTB33(Zf)/GM12878-ZBTB33-ChIP-Seq(GSE32465)/Homer/GGVTCTCGCGAGAAC	1	0
138	Zic(Zf)/Cerebellum-ZIC1.2-ChIP-Seq(GSE60731)/Homer/CCTGCTGAGH	1	0
139	ZNF143|STAF(Zf)/CUTLL-ZNF143-ChIP-Seq(GSE29600)/Homer/ATTTCCCAGVAKSCY	1	0
140	ZNF264(Zf)/HEK293-ZNF264.GFP-ChIP-Seq(GSE58341)/Homer/RGGGCACTAACY	1	0
141	ZNF467(Zf)/HEK293-ZNF467.GFP-ChIP-Seq(GSE58341)/Homer/TGGGGAAGGGCM	1	0

## Sheet: 3a4_overlap_Motif
universe		A	B
1	AMYB(HTH)/Testes-AMYB-ChIP-Seq(GSE44588)/Homer/TGGCAGTTGG	1	1
2	AP-1(bZIP)/ThioMac-PU.1-ChIP-Seq(GSE21512)/Homer/VTGACTCATC	1	1
3	Arnt:Ahr(bHLH)/MCF7-Arnt-ChIP-Seq(Lo_et_al.)/Homer/TBGCACGCAA	1	0
4	Atf1(bZIP)/K562-ATF1-ChIP-Seq(GSE31477)/Homer/GATGACGTCA	1	1
5	Atf2(bZIP)/3T3L1-Atf2-ChIP-Seq(GSE56872)/Homer/NRRTGACGTCAT	1	1
6	Atf3(bZIP)/GBM-ATF3-ChIP-Seq(GSE33912)/Homer/DATGASTCATHN	1	1
7	Atf7(bZIP)/3T3L1-Atf7-ChIP-Seq(GSE56872)/Homer/NGRTGACGTCAY	1	1
8	Bach1(bZIP)/K562-Bach1-ChIP-Seq(GSE31477)/Homer/AWWNTGCTGAGTCAT	1	0
9	Bach2(bZIP)/OCILy7-Bach2-ChIP-Seq(GSE44420)/Homer/TGCTGAGTCA	1	0
10	BATF(bZIP)/Th17-BATF-ChIP-Seq(GSE39756)/Homer/DATGASTCAT	1	1
11	bHLHE40(bHLH)/HepG2-BHLHE40-ChIP-Seq(GSE31477)/Homer/KCACGTGMCN	1	0
12	BMAL1(bHLH)/Liver-Bmal1-ChIP-Seq(GSE39860)/Homer/GNCACGTG	1	0
13	BMYB(HTH)/Hela-BMYB-ChIP-Seq(GSE27030)/Homer/NHAACBGYYV	1	0
14	BORIS(Zf)/K562-CTCFL-ChIP-Seq(GSE32465)/Homer/CNNBRGCGCCCCCTGSTGGC	1	0
15	CEBP:AP1(bZIP)/ThioMac-CEBPb-ChIP-Seq(GSE21512)/Homer/DRTGTTGCAA	1	0
16	CEBP(bZIP)/ThioMac-CEBPb-ChIP-Seq(GSE21512)/Homer/ATTGCGCAAC	1	0
17	c-Jun-CRE(bZIP)/K562-cJun-ChIP-Seq(GSE31477)/Homer/ATGACGTCATCY	1	1
18	CLOCK(bHLH)/Liver-Clock-ChIP-Seq(GSE39860)/Homer/GHCACGTG	1	0
19	c-Myc(bHLH)/LNCAP-cMyc-ChIP-Seq(Unpublished)/Homer/VCCACGTG	1	0
20	CRE(bZIP)/Promoter/Homer/CSGTGACGTCAC	1	0
21	CTCF(Zf)/CD4+-CTCF-ChIP-Seq(Barski_et_al.)/Homer/AYAGTGCCMYCTRGTGGCCA	1	0
22	E2F1(E2F)/Hela-E2F1-ChIP-Seq(GSE22478)/Homer/CWGGCGGGAA	1	0
23	E2F3(E2F)/MEF-E2F3-ChIP-Seq(GSE71376)/Homer/BTKGGCGGGAAA	1	0
24	E2F4(E2F)/K562-E2F4-ChIP-Seq(GSE31477)/Homer/GGCGGGAAAH	1	1
25	E2F6(E2F)/Hela-E2F6-ChIP-Seq(GSE31477)/Homer/GGCGGGAARN	1	0
26	E2F7(E2F)/Hela-E2F7-ChIP-Seq(GSE32673)/Homer/VDTTTCCCGCCA	1	0
27	E2F(E2F)/Hela-CellCycle-Expression/Homer/TTSGCGCGAAAA	1	0
28	E-box(bHLH)/Promoter/Homer/SSGGTCACGTGA	1	1
29	Egr1(Zf)/K562-Egr1-ChIP-Seq(GSE32465)/Homer/TGCGTGGGYG	1	1
30	Egr2(Zf)/Thymocytes-Egr2-ChIP-Seq(GSE34254)/Homer/NGCGTGGGCGGR	1	1
31	EHF(ETS)/LoVo-EHF-ChIP-Seq(GSE49402)/Homer/AVCAGGAAGT	1	1
32	EKLF(Zf)/Erythrocyte-Klf1-ChIP-Seq(GSE20478)/Homer/NWGGGTGTGGCY	1	1
33	ELF1(ETS)/Jurkat-ELF1-ChIP-Seq(SRA014231)/Homer/AVCCGGAAGT	1	1
34	ELF3(ETS)/PDAC-ELF3-ChIP-Seq(GSE64557)/Homer/ANCAGGAAGT	1	1
35	ELF5(ETS)/T47D-ELF5-ChIP-Seq(GSE30407)/Homer/ACVAGGAAGT	1	1
36	Elk1(ETS)/Hela-Elk1-ChIP-Seq(GSE31477)/Homer/HACTTCCGGY	1	1
37	Elk4(ETS)/Hela-Elk4-ChIP-Seq(GSE31477)/Homer/NRYTTCCGGY	1	1
38	ERG(ETS)/VCaP-ERG-ChIP-Seq(GSE14097)/Homer/ACAGGAAGTG	1	1
39	Ets1-distal(ETS)/CD4+-PolII-ChIP-Seq(Barski_et_al.)/Homer/MACAGGAAGT	1	1
40	ETS1(ETS)/Jurkat-ETS1-ChIP-Seq(GSE17954)/Homer/ACAGGAAGTG	1	1
41	ETS:E-box(ETS,bHLH)/HPC7-Scl-ChIP-Seq(GSE22178)/Homer/AGGAARCAGCTG	1	0
42	ETS(ETS)/Promoter/Homer/AACCGGAAGT	1	1
43	ETS:RUNX(ETS,Runt)/Jurkat-RUNX1-ChIP-Seq(GSE17954)/Homer/RCAGGATGTGGT	1	0
44	ETV1(ETS)/GIST48-ETV1-ChIP-Seq(GSE22441)/Homer/AACCGGAAGT	1	1
45	Etv2(ETS)/ES-ER71-ChIP-Seq(GSE59402)/Homer(0.967)/NNAYTTCCTGHN	1	1
46	EWS:ERG-fusion(ETS)/CADO_ES1-EWS:ERG-ChIP-Seq(SRA014231)/Homer/ATTTCCTGTN	1	1
47	EWS:FLI1-fusion(ETS)/SK_N_MC-EWS:FLI1-ChIP-Seq(SRA014231)/Homer/VACAGGAAAT	1	1
48	Fli1(ETS)/CD8-FLI-ChIP-Seq(GSE20898)/Homer/NRYTTCCGGH	1	1
49	Fosl2(bZIP)/3T3L1-Fosl2-ChIP-Seq(GSE56872)/Homer/NATGASTCABNN	1	1
50	Foxo1(Forkhead)/RAW-Foxo1-ChIP-Seq(Fan_et_al.)/Homer/CTGTTTAC	1	0
51	Fra1(bZIP)/BT549-Fra1-ChIP-Seq(GSE46166)/Homer/NNATGASTCATH	1	1
52	Fra2(bZIP)/Striatum-Fra2-ChIP-Seq(GSE43429)/Homer/GGATGACTCATC	1	1
53	GABPA(ETS)/Jurkat-GABPa-ChIP-Seq(GSE17954)/Homer/RACCGGAAGT	1	1
54	Gata1(Zf)/K562-GATA1-ChIP-Seq(GSE18829)/Homer/SAGATAAGRV	1	0
55	Gata2(Zf)/K562-GATA2-ChIP-Seq(GSE18829)/Homer/BBCTTATCTS	1	0
56	GATA3(Zf)/iTreg-Gata3-ChIP-Seq(GSE20898)/Homer/AGATAASR	1	0
57	Gata4(Zf)/Heart-Gata4-ChIP-Seq(GSE35151)/Homer/NBWGATAAGR	1	0
58	Gata6(Zf)/HUG1N-GATA6-ChIP-Seq(GSE51936)/Homer/YCTTATCTBN	1	0
59	GATA:SCL(Zf,bHLH)/Ter119-SCL-ChIP-Seq(GSE18720)/Homer/CRGCTGBNGNSNNSAGATAA	1	0
60	GATA(Zf),IR3/iTreg-Gata3-ChIP-Seq(GSE20898)/Homer/NNNNNBAGATAWYATCTVHN	1	0
61	Gfi1b(Zf)/HPC7-Gfi1b-ChIP-Seq(GSE22178)/Homer/MAATCACTGC	1	0
62	GFX(?)/Promoter/Homer/ATTCTCGCGAGA	1	1
63	GFY(?)/Promoter/Homer/ACTACAATTCCC	1	1
64	GFY-Staf(?,Zf)/Promoter/Homer/RACTACAATTCCCAGAAKGC	1	1
65	GLI3(Zf)/Limb-GLI3-ChIP-Chip(GSE11077)/Homer/CGTGGGTGGTCC	1	0
66	HIF-1b(HLH)/T47D-HIF1b-ChIP-Seq(GSE59937)/Homer/RTACGTGC	1	0
67	HOXA9(Homeobox)/HSC-Hoxa9-ChIP-Seq(GSE33509)/Homer/GGCCATAAATCA	1	0
68	IRF2(IRF)/Erythroblas-IRF2-ChIP-Seq(GSE36985)/Homer/GAAASYGAAASY	1	1
69	IRF3(IRF)/BMDM-Irf3-ChIP-Seq(GSE67343)/Homer/AGTTTCAKTTTC	1	0
70	IRF8(IRF)/BMDM-IRF8-ChIP-Seq(GSE77884)/Homer/GRAASTGAAAST	1	1
71	ISRE(IRF)/ThioMac-LPS-Expression(GSE23622)/Homer/AGTTTCASTTTC	0	1
72	Jun-AP1(bZIP)/K562-cJun-ChIP-Seq(GSE31477)/Homer/GATGASTCATCN	1	1
73	JunB(bZIP)/DendriticCells-Junb-ChIP-Seq(GSE36099)/Homer/RATGASTCAT	1	1
74	JunD(bZIP)/K562-JunD-ChIP-Seq/Homer/ATGACGTCATCN	1	1
75	KLF10(Zf)/HEK293-KLF10.GFP-ChIP-Seq(GSE58341)/Homer/GGGGGTGTGTCC	1	1
76	KLF14(Zf)/HEK293-KLF14.GFP-ChIP-Seq(GSE58341)/Homer/RGKGGGCGKGGC	1	1
77	KLF3(Zf)/MEF-Klf3-ChIP-Seq(GSE44748)/Homer/NRGCCCCRCCCHBNN	1	1
78	Klf4(Zf)/mES-Klf4-ChIP-Seq(GSE11431)/Homer/GCCACACCCA	1	1
79	KLF5(Zf)/LoVo-KLF5-ChIP-Seq(GSE49402)/Homer/DGGGYGKGGC	1	1
80	KLF6(Zf)/PDAC-KLF6-ChIP-Seq(GSE64557)/Homer/MKGGGYGTGGCC	1	1
81	Klf9(Zf)/GBM-Klf9-ChIP-Seq(GSE62211)/Homer/GCCACRCCCACY	1	1
82	Lhx3(Homeobox)/Neuron-Lhx3-ChIP-Seq(GSE31456)/Homer/ADBTAATTAR	1	0
83	MafA(bZIP)/Islet-MafA-ChIP-Seq(GSE30298)/Homer/TGCTGACTCA	1	0
84	MafB(bZIP)/BMM-Mafb-ChIP-Seq(GSE75722)/Homer/WNTGCTGASTCAGCANWTTY	1	0
85	MafK(bZIP)/C2C12-MafK-ChIP-Seq(GSE36030)/Homer/GCTGASTCAGCA	1	0
86	Max(bHLH)/K562-Max-ChIP-Seq(GSE31477)/Homer/RCCACGTGGYYN	1	0
87	Maz(Zf)/HepG2-Maz-ChIP-Seq(GSE31477)/Homer/GGGGGGGG	1	1
88	Meis1(Homeobox)/MastCells-Meis1-ChIP-Seq(GSE48085)/Homer/VGCTGWCAVB	1	0
89	MITF(bHLH)/MastCells-MITF-ChIP-Seq(GSE48085)/Homer/RTCATGTGAC	1	0
90	MYB(HTH)/ERMYB-Myb-ChIPSeq(GSE22095)/Homer/GGCVGTTR	1	0
91	Nanog(Homeobox)/mES-Nanog-ChIP-Seq(GSE11724)/Homer/RGCCATTAAC	1	0
92	NF1(CTF)/LNCAP-NF1-ChIP-Seq(Unpublished)/Homer/CYTGGCABNSTGCCAR	1	0
93	NF-E2(bZIP)/K562-NFE2-ChIP-Seq(GSE31477)/Homer/GATGACTCAGCA	1	0
94	NFY(CCAAT)/Promoter/Homer/RGCCAATSRG	1	1
95	n-Myc(bHLH)/mES-nMyc-ChIP-Seq(GSE11431)/Homer/VRCCACGTGG	1	0
96	NPAS2(bHLH)/Liver-NPAS2-ChIP-Seq(GSE39860)/Homer/KCCACGTGAC	1	0
97	NPAS(bHLH)/Liver-NPAS-ChIP-Seq(GSE39860)/Homer/NVCACGTG	1	0
98	NRF1(NRF)/MCF7-NRF1-ChIP-Seq(Unpublished)/Homer/CTGCGCATGCGC	1	1
99	Nrf2(bZIP)/Lymphoblast-Nrf2-ChIP-Seq(GSE37589)/Homer/HTGCTGAGTCAT	1	0
100	NRF(NRF)/Promoter/Homer/STGCGCATGCGC	1	1
101	Oct6(POU,Homeobox)/NPC-Pou3f1-ChIP-Seq(GSE35496)/Homer/WATGCAAATGAG	1	0
102	PBX1(Homeobox)/MCF7-PBX1-ChIP-Seq(GSE28007)/Homer/GSCTGTCACTCA	1	1
103	Pbx3(Homeobox)/GM12878-PBX3-ChIP-Seq(GSE32465)/Homer/SCTGTCAMTCAN	1	1
104	Pknox1(Homeobox)/ES-Prep1-ChIP-Seq(GSE63282)/Homer/SCTGTCAVTCAV	1	1
105	PU.1(ETS)/ThioMac-PU.1-ChIP-Seq(GSE21512)/Homer/AGAGGAAGTG	1	1
106	PU.1:IRF8(ETS:IRF)/pDC-Irf8-ChIP-Seq(GSE66899)/Homer/GGAAGTGAAAST	1	0
107	PU.1-IRF(ETS:IRF)/Bcell-PU.1-ChIP-Seq(GSE21512)/Homer/MGGAAGTGAAAC	1	1
108	Rfx1(HTH)/NPC-H3K4me1-ChIP-Seq(GSE16256)/Homer/KGTTGCCATGGCAA	1	0
109	Rfx2(HTH)/LoVo-RFX2-ChIP-Seq(GSE49402)/Homer/GTTGCCATGGCAACM	1	0
110	Rfx5(HTH)/GM12878-Rfx5-ChIP-Seq(GSE31477)/Homer/SCCTAGCAACAG	1	1
111	Rfx6(HTH)/Min6b1-Rfx6.HA-ChIP-Seq(GSE62844)/Homer/TGTTKCCTAGCAACM	1	0
112	RFX(HTH)/K562-RFX3-ChIP-Seq(SRA012198)/Homer/CGGTTGCCATGGCAAC	1	0
113	Ronin(THAP)/ES-Thap11-ChIP-Seq(GSE51522)/Homer/RACTACAACTCCCAGVAKGC	1	1
114	RUNX1(Runt)/Jurkat-RUNX1-ChIP-Seq(GSE29180)/Homer/AAACCACARM	1	1
115	RUNX2(Runt)/PCa-RUNX2-ChIP-Seq(GSE33889)/Homer/NWAACCACADNN	1	1
116	RUNX-AML(Runt)/CD4+-PolII-ChIP-Seq(Barski_et_al.)/Homer/GCTGTGGTTW	1	1
117	RUNX(Runt)/HPC7-Runx1-ChIP-Seq(GSE22178)/Homer/SAAACCACAG	1	1
118	Smad3(MAD)/NPC-Smad3-ChIP-Seq(GSE36673)/Homer/TWGTCTGV	1	1
119	Smad4(MAD)/ESC-SMAD4-ChIP-Seq(GSE29422)/Homer/VBSYGTCTGG	1	0
120	Sp1(Zf)/Promoter/Homer/GGCCCCGCCCCC	1	1
121	Sp5(Zf)/mES-Sp5.Flag-ChIP-Seq(GSE72989)/Homer/RGKGGGCGGAGC	1	1
122	SPDEF(ETS)/VCaP-SPDEF-ChIP-Seq(SRA014231)/Homer/ASWTCCTGBT	1	1
123	SpiB(ETS)/OCILY3-SPIB-ChIP-Seq(GSE56857)/Homer/AAAGRGGAAGTG	1	1
124	Srebp1a(bHLH)/HepG2-Srebp1a-ChIP-Seq(GSE31477)/Homer/RTCACSCCAY	1	0
125	Srebp2(bHLH)/HepG2-Srebp2-ChIP-Seq(GSE31477)/Homer/CGGTCACSCCAC	1	0
126	STAT1(Stat)/HelaS3-STAT1-ChIP-Seq(GSE12782)/Homer/NATTTCCNGGAAAT	1	0
127	Stat3+il21(Stat)/CD4-Stat3-ChIP-Seq(GSE19198)/Homer/SVYTTCCNGGAARB	1	1
128	Stat3(Stat)/mES-Stat3-ChIP-Seq(GSE11431)/Homer/CTTCCGGGAA	1	1
129	STAT4(Stat)/CD4-Stat4-ChIP-Seq(GSE22104)/Homer/NYTTCCWGGAAR	1	0
130	STAT5(Stat)/mCD4+-Stat5-ChIP-Seq(GSE12346)/Homer/RTTTCTNAGAAA	1	0
131	TATA-Box(TBP)/Promoter/Homer/CCTTTTAWAGSC	1	0
132	TFE3(bHLH)/MEF-TFE3-ChIP-Seq(GSE75757)/Homer/GTCACGTGACYV	1	0
133	Tlx?(NR)/NPC-H3K4me1-ChIP-Seq(GSE16256)/Homer/CTGGCAGSCTGCCA	1	0
134	Unknown(Homeobox)/Limb-p300-ChIP-Seq/Homer/SSCMATWAAA	1	0
135	USF1(bHLH)/GM12878-Usf1-ChIP-Seq(GSE32465)/Homer/SGTCACGTGR	1	0
136	Usf2(bHLH)/C2C12-Usf2-ChIP-Seq(GSE36030)/Homer/GTCACGTGGT	1	1
137	X-box(HTH)/NPC-H3K4me1-ChIP-Seq(GSE16256)/Homer/GGTTGCCATGGCAA	1	0
138	YY1(Zf)/Promoter/Homer/CAAGATGGCGGC	1	1
139	ZBTB33(Zf)/GM12878-ZBTB33-ChIP-Seq(GSE32465)/Homer/GGVTCTCGCGAGAAC	1	1
140	Zfp281(Zf)/ES-Zfp281-ChIP-Seq(GSE81042)/Homer/CCCCTCCCCCAC	1	0
141	Zic(Zf)/Cerebellum-ZIC1.2-ChIP-Seq(GSE60731)/Homer/CCTGCTGAGH	1	0
142	ZNF143|STAF(Zf)/CUTLL-ZNF143-ChIP-Seq(GSE29600)/Homer/ATTTCCCAGVAKSCY	1	1
143	ZNF264(Zf)/HEK293-ZNF264.GFP-ChIP-Seq(GSE58341)/Homer/RGGGCACTAACY	1	0
144	ZNF382(Zf)/HEK293-ZNF382.GFP-ChIP-Seq(GSE58341)/Homer/GNCTGTASTRNTGBCTCHTT	1	0
145	ZNF467(Zf)/HEK293-ZNF467.GFP-ChIP-Seq(GSE58341)/Homer/TGGGGAAGGGCM	1	1
146	ZNF519(Zf)/HEK293-ZNF519.GFP-ChIP-Seq(GSE58341)/Homer/GAGSCCGAGC	0	1
147	ZNF711(Zf)/SHSY5Y-ZNF711-ChIP-Seq(GSE20673)/Homer/AGGCCTAG	0	1
148	ZSCAN22(Zf)/HEK293-ZSCAN22.GFP-ChIP-Seq(GSE58341)/Homer/SMCAGTCWGAKGGAGGAGGC	1	0

## Sheet: 3a5_overlap_Motif
universe		A	B
1	AMYB(HTH)/Testes-AMYB-ChIP-Seq(GSE44588)/Homer/TGGCAGTTGG	0	1
2	AP-1(bZIP)/ThioMac-PU.1-ChIP-Seq(GSE21512)/Homer/VTGACTCATC	1	1
3	Arnt:Ahr(bHLH)/MCF7-Arnt-ChIP-Seq(Lo_et_al.)/Homer/TBGCACGCAA	0	1
4	Atf1(bZIP)/K562-ATF1-ChIP-Seq(GSE31477)/Homer/GATGACGTCA	1	1
5	Atf2(bZIP)/3T3L1-Atf2-ChIP-Seq(GSE56872)/Homer/NRRTGACGTCAT	0	1
6	Atf3(bZIP)/GBM-ATF3-ChIP-Seq(GSE33912)/Homer/DATGASTCATHN	1	1
7	Atf4(bZIP)/MEF-Atf4-ChIP-Seq(GSE35681)/Homer/MTGATGCAAT	0	1
8	Atf7(bZIP)/3T3L1-Atf7-ChIP-Seq(GSE56872)/Homer/NGRTGACGTCAY	0	1
9	Bach1(bZIP)/K562-Bach1-ChIP-Seq(GSE31477)/Homer/AWWNTGCTGAGTCAT	1	1
10	Bach2(bZIP)/OCILy7-Bach2-ChIP-Seq(GSE44420)/Homer/TGCTGAGTCA	1	1
11	BATF(bZIP)/Th17-BATF-ChIP-Seq(GSE39756)/Homer/DATGASTCAT	1	1
12	bHLHE40(bHLH)/HepG2-BHLHE40-ChIP-Seq(GSE31477)/Homer/KCACGTGMCN	0	1
13	BMAL1(bHLH)/Liver-Bmal1-ChIP-Seq(GSE39860)/Homer/GNCACGTG	0	1
14	BMYB(HTH)/Hela-BMYB-ChIP-Seq(GSE27030)/Homer/NHAACBGYYV	0	1
15	BORIS(Zf)/K562-CTCFL-ChIP-Seq(GSE32465)/Homer/CNNBRGCGCCCCCTGSTGGC	0	1
16	CArG(MADS)/PUER-Srf-ChIP-Seq(Sullivan_et_al.)/Homer/CCATATATGGNM	0	1
17	CEBP:AP1(bZIP)/ThioMac-CEBPb-ChIP-Seq(GSE21512)/Homer/DRTGTTGCAA	0	1
18	CEBP(bZIP)/ThioMac-CEBPb-ChIP-Seq(GSE21512)/Homer/ATTGCGCAAC	0	1
19	Chop(bZIP)/MEF-Chop-ChIP-Seq(GSE35681)/Homer/ATTGCATCAT	0	1
20	c-Jun-CRE(bZIP)/K562-cJun-ChIP-Seq(GSE31477)/Homer/ATGACGTCATCY	0	1
21	CLOCK(bHLH)/Liver-Clock-ChIP-Seq(GSE39860)/Homer/GHCACGTG	0	1
22	c-Myc(bHLH)/LNCAP-cMyc-ChIP-Seq(Unpublished)/Homer/VCCACGTG	1	1
23	c-Myc(bHLH)/mES-cMyc-ChIP-Seq(GSE11431)/Homer/VVCCACGTGG	0	1
24	CRE(bZIP)/Promoter/Homer/CSGTGACGTCAC	0	1
25	CTCF(Zf)/CD4+-CTCF-ChIP-Seq(Barski_et_al.)/Homer/AYAGTGCCMYCTRGTGGCCA	0	1
26	E2F1(E2F)/Hela-E2F1-ChIP-Seq(GSE22478)/Homer/CWGGCGGGAA	0	1
27	E2F3(E2F)/MEF-E2F3-ChIP-Seq(GSE71376)/Homer/BTKGGCGGGAAA	0	1
28	E2F4(E2F)/K562-E2F4-ChIP-Seq(GSE31477)/Homer/GGCGGGAAAH	1	1
29	E2F6(E2F)/Hela-E2F6-ChIP-Seq(GSE31477)/Homer/GGCGGGAARN	0	1
30	E2F7(E2F)/Hela-E2F7-ChIP-Seq(GSE32673)/Homer/VDTTTCCCGCCA	0	1
31	E2F(E2F)/Hela-CellCycle-Expression/Homer/TTSGCGCGAAAA	0	1
32	E-box(bHLH)/Promoter/Homer/SSGGTCACGTGA	1	1
33	Egr1(Zf)/K562-Egr1-ChIP-Seq(GSE32465)/Homer/TGCGTGGGYG	1	1
34	Egr2(Zf)/Thymocytes-Egr2-ChIP-Seq(GSE34254)/Homer/NGCGTGGGCGGR	1	1
35	EHF(ETS)/LoVo-EHF-ChIP-Seq(GSE49402)/Homer/AVCAGGAAGT	1	1
36	EKLF(Zf)/Erythrocyte-Klf1-ChIP-Seq(GSE20478)/Homer/NWGGGTGTGGCY	1	1
37	ELF1(ETS)/Jurkat-ELF1-ChIP-Seq(SRA014231)/Homer/AVCCGGAAGT	1	1
38	ELF3(ETS)/PDAC-ELF3-ChIP-Seq(GSE64557)/Homer/ANCAGGAAGT	1	1
39	ELF5(ETS)/T47D-ELF5-ChIP-Seq(GSE30407)/Homer/ACVAGGAAGT	1	1
40	Elk1(ETS)/Hela-Elk1-ChIP-Seq(GSE31477)/Homer/HACTTCCGGY	1	1
41	Elk4(ETS)/Hela-Elk4-ChIP-Seq(GSE31477)/Homer/NRYTTCCGGY	1	1
42	ERG(ETS)/VCaP-ERG-ChIP-Seq(GSE14097)/Homer/ACAGGAAGTG	1	1
43	Ets1-distal(ETS)/CD4+-PolII-ChIP-Seq(Barski_et_al.)/Homer/MACAGGAAGT	1	1
44	ETS1(ETS)/Jurkat-ETS1-ChIP-Seq(GSE17954)/Homer/ACAGGAAGTG	1	1
45	ETS:E-box(ETS,bHLH)/HPC7-Scl-ChIP-Seq(GSE22178)/Homer/AGGAARCAGCTG	0	1
46	ETS(ETS)/Promoter/Homer/AACCGGAAGT	1	1
47	ETS:RUNX(ETS,Runt)/Jurkat-RUNX1-ChIP-Seq(GSE17954)/Homer/RCAGGATGTGGT	1	1
48	ETV1(ETS)/GIST48-ETV1-ChIP-Seq(GSE22441)/Homer/AACCGGAAGT	1	1
49	Etv2(ETS)/ES-ER71-ChIP-Seq(GSE59402)/Homer(0.967)/NNAYTTCCTGHN	1	1
50	EWS:ERG-fusion(ETS)/CADO_ES1-EWS:ERG-ChIP-Seq(SRA014231)/Homer/ATTTCCTGTN	1	1
51	EWS:FLI1-fusion(ETS)/SK_N_MC-EWS:FLI1-ChIP-Seq(SRA014231)/Homer/VACAGGAAAT	1	1
52	Fli1(ETS)/CD8-FLI-ChIP-Seq(GSE20898)/Homer/NRYTTCCGGH	1	1
53	Fosl2(bZIP)/3T3L1-Fosl2-ChIP-Seq(GSE56872)/Homer/NATGASTCABNN	1	1
54	Foxo1(Forkhead)/RAW-Foxo1-ChIP-Seq(Fan_et_al.)/Homer/CTGTTTAC	0	1
55	Fra1(bZIP)/BT549-Fra1-ChIP-Seq(GSE46166)/Homer/NNATGASTCATH	1	1
56	Fra2(bZIP)/Striatum-Fra2-ChIP-Seq(GSE43429)/Homer/GGATGACTCATC	1	1
57	GABPA(ETS)/Jurkat-GABPa-ChIP-Seq(GSE17954)/Homer/RACCGGAAGT	1	1
58	Gata1(Zf)/K562-GATA1-ChIP-Seq(GSE18829)/Homer/SAGATAAGRV	0	1
59	Gata2(Zf)/K562-GATA2-ChIP-Seq(GSE18829)/Homer/BBCTTATCTS	0	1
60	GATA3(Zf)/iTreg-Gata3-ChIP-Seq(GSE20898)/Homer/AGATAASR	0	1
61	Gata4(Zf)/Heart-Gata4-ChIP-Seq(GSE35151)/Homer/NBWGATAAGR	0	1
62	Gata6(Zf)/HUG1N-GATA6-ChIP-Seq(GSE51936)/Homer/YCTTATCTBN	0	1
63	GATA:SCL(Zf,bHLH)/Ter119-SCL-ChIP-Seq(GSE18720)/Homer/CRGCTGBNGNSNNSAGATAA	1	1
64	Gfi1b(Zf)/HPC7-Gfi1b-ChIP-Seq(GSE22178)/Homer/MAATCACTGC	0	1
65	GFX(?)/Promoter/Homer/ATTCTCGCGAGA	1	1
66	GFY(?)/Promoter/Homer/ACTACAATTCCC	1	1
67	GFY-Staf(?,Zf)/Promoter/Homer/RACTACAATTCCCAGAAKGC	1	1
68	HIF-1a(bHLH)/MCF7-HIF1a-ChIP-Seq(GSE28352)/Homer/TACGTGCV	0	1
69	HIF-1b(HLH)/T47D-HIF1b-ChIP-Seq(GSE59937)/Homer/RTACGTGC	0	1
70	HIF2a(bHLH)/785_O-HIF2a-ChIP-Seq(GSE34871)/Homer/GCACGTACCC	0	1
71	HLF(bZIP)/HSC-HLF.Flag-ChIP-Seq(GSE69817)/Homer/RTTATGYAAB	0	1
72	IRF8(IRF)/BMDM-IRF8-ChIP-Seq(GSE77884)/Homer/GRAASTGAAAST	0	1
73	Jun-AP1(bZIP)/K562-cJun-ChIP-Seq(GSE31477)/Homer/GATGASTCATCN	1	1
74	JunB(bZIP)/DendriticCells-Junb-ChIP-Seq(GSE36099)/Homer/RATGASTCAT	1	1
75	JunD(bZIP)/K562-JunD-ChIP-Seq/Homer/ATGACGTCATCN	0	1
76	KLF10(Zf)/HEK293-KLF10.GFP-ChIP-Seq(GSE58341)/Homer/GGGGGTGTGTCC	1	1
77	KLF14(Zf)/HEK293-KLF14.GFP-ChIP-Seq(GSE58341)/Homer/RGKGGGCGKGGC	1	1
78	KLF3(Zf)/MEF-Klf3-ChIP-Seq(GSE44748)/Homer/NRGCCCCRCCCHBNN	1	1
79	Klf4(Zf)/mES-Klf4-ChIP-Seq(GSE11431)/Homer/GCCACACCCA	1	1
80	KLF5(Zf)/LoVo-KLF5-ChIP-Seq(GSE49402)/Homer/DGGGYGKGGC	1	1
81	KLF6(Zf)/PDAC-KLF6-ChIP-Seq(GSE64557)/Homer/MKGGGYGTGGCC	1	1
82	Klf9(Zf)/GBM-Klf9-ChIP-Seq(GSE62211)/Homer/GCCACRCCCACY	1	1
83	Lhx3(Homeobox)/Neuron-Lhx3-ChIP-Seq(GSE31456)/Homer/ADBTAATTAR	0	1
84	MafA(bZIP)/Islet-MafA-ChIP-Seq(GSE30298)/Homer/TGCTGACTCA	0	1
85	MafB(bZIP)/BMM-Mafb-ChIP-Seq(GSE75722)/Homer/WNTGCTGASTCAGCANWTTY	0	1
86	MafK(bZIP)/C2C12-MafK-ChIP-Seq(GSE36030)/Homer/GCTGASTCAGCA	0	1
87	Max(bHLH)/K562-Max-ChIP-Seq(GSE31477)/Homer/RCCACGTGGYYN	0	1
88	Maz(Zf)/HepG2-Maz-ChIP-Seq(GSE31477)/Homer/GGGGGGGG	1	1
89	Meis1(Homeobox)/MastCells-Meis1-ChIP-Seq(GSE48085)/Homer/VGCTGWCAVB	0	1
90	MITF(bHLH)/MastCells-MITF-ChIP-Seq(GSE48085)/Homer/RTCATGTGAC	0	1
91	MYB(HTH)/ERMYB-Myb-ChIPSeq(GSE22095)/Homer/GGCVGTTR	0	1
92	Nanog(Homeobox)/mES-Nanog-ChIP-Seq(GSE11724)/Homer/RGCCATTAAC	0	1
93	NF1(CTF)/LNCAP-NF1-ChIP-Seq(Unpublished)/Homer/CYTGGCABNSTGCCAR	0	1
94	NF-E2(bZIP)/K562-NFE2-ChIP-Seq(GSE31477)/Homer/GATGACTCAGCA	1	1
95	NFkB-p65-Rel(RHD)/ThioMac-LPS-Expression(GSE23622)/Homer/GGAAATTCCC	1	0
96	NFY(CCAAT)/Promoter/Homer/RGCCAATSRG	1	1
97	n-Myc(bHLH)/mES-nMyc-ChIP-Seq(GSE11431)/Homer/VRCCACGTGG	0	1
98	NPAS(bHLH)/Liver-NPAS-ChIP-Seq(GSE39860)/Homer/NVCACGTG	0	1
99	NRF1(NRF)/MCF7-NRF1-ChIP-Seq(Unpublished)/Homer/CTGCGCATGCGC	1	1
100	Nrf2(bZIP)/Lymphoblast-Nrf2-ChIP-Seq(GSE37589)/Homer/HTGCTGAGTCAT	1	1
101	NRF(NRF)/Promoter/Homer/STGCGCATGCGC	1	1
102	PAX5(Paired,Homeobox),condensed/GM12878-PAX5-ChIP-Seq(GSE32465)/Homer/GTCACGCTCSCTGM	0	1
103	PBX1(Homeobox)/MCF7-PBX1-ChIP-Seq(GSE28007)/Homer/GSCTGTCACTCA	0	1
104	Pbx3(Homeobox)/GM12878-PBX3-ChIP-Seq(GSE32465)/Homer/SCTGTCAMTCAN	0	1
105	Pknox1(Homeobox)/ES-Prep1-ChIP-Seq(GSE63282)/Homer/SCTGTCAVTCAV	0	1
106	PU.1(ETS)/ThioMac-PU.1-ChIP-Seq(GSE21512)/Homer/AGAGGAAGTG	1	1
107	PU.1:IRF8(ETS:IRF)/pDC-Irf8-ChIP-Seq(GSE66899)/Homer/GGAAGTGAAAST	0	1
108	PU.1-IRF(ETS:IRF)/Bcell-PU.1-ChIP-Seq(GSE21512)/Homer/MGGAAGTGAAAC	0	1
109	RAR:RXR(NR),DR5/ES-RAR-ChIP-Seq(GSE56893)/Homer/RGGTCADNNAGAGGTCAV	1	0
110	Rfx1(HTH)/NPC-H3K4me1-ChIP-Seq(GSE16256)/Homer/KGTTGCCATGGCAA	1	1
111	Rfx2(HTH)/LoVo-RFX2-ChIP-Seq(GSE49402)/Homer/GTTGCCATGGCAACM	1	1
112	Rfx5(HTH)/GM12878-Rfx5-ChIP-Seq(GSE31477)/Homer/SCCTAGCAACAG	1	1
113	Rfx6(HTH)/Min6b1-Rfx6.HA-ChIP-Seq(GSE62844)/Homer/TGTTKCCTAGCAACM	0	1
114	RFX(HTH)/K562-RFX3-ChIP-Seq(SRA012198)/Homer/CGGTTGCCATGGCAAC	1	1
115	Ronin(THAP)/ES-Thap11-ChIP-Seq(GSE51522)/Homer/RACTACAACTCCCAGVAKGC	1	1
116	RUNX1(Runt)/Jurkat-RUNX1-ChIP-Seq(GSE29180)/Homer/AAACCACARM	1	1
117	RUNX2(Runt)/PCa-RUNX2-ChIP-Seq(GSE33889)/Homer/NWAACCACADNN	1	1
118	RUNX-AML(Runt)/CD4+-PolII-ChIP-Seq(Barski_et_al.)/Homer/GCTGTGGTTW	1	1
119	RUNX(Runt)/HPC7-Runx1-ChIP-Seq(GSE22178)/Homer/SAAACCACAG	1	1
120	RXR(NR),DR1/3T3L1-RXR-ChIP-Seq(GSE13511)/Homer/TAGGGCAAAGGTCA	0	1
121	Smad2(MAD)/ES-SMAD2-ChIP-Seq(GSE29422)/Homer/CTGTCTGG	0	1
122	Smad3(MAD)/NPC-Smad3-ChIP-Seq(GSE36673)/Homer/TWGTCTGV	0	1
123	Smad4(MAD)/ESC-SMAD4-ChIP-Seq(GSE29422)/Homer/VBSYGTCTGG	0	1
124	Sp1(Zf)/Promoter/Homer/GGCCCCGCCCCC	1	1
125	Sp5(Zf)/mES-Sp5.Flag-ChIP-Seq(GSE72989)/Homer/RGKGGGCGGAGC	1	1
126	SPDEF(ETS)/VCaP-SPDEF-ChIP-Seq(SRA014231)/Homer/ASWTCCTGBT	1	1
127	SpiB(ETS)/OCILY3-SPIB-ChIP-Seq(GSE56857)/Homer/AAAGRGGAAGTG	1	1
128	Srebp1a(bHLH)/HepG2-Srebp1a-ChIP-Seq(GSE31477)/Homer/RTCACSCCAY	0	1
129	STAT1(Stat)/HelaS3-STAT1-ChIP-Seq(GSE12782)/Homer/NATTTCCNGGAAAT	1	1
130	Stat3+il21(Stat)/CD4-Stat3-ChIP-Seq(GSE19198)/Homer/SVYTTCCNGGAARB	0	1
131	Stat3(Stat)/mES-Stat3-ChIP-Seq(GSE11431)/Homer/CTTCCGGGAA	1	1
132	STAT4(Stat)/CD4-Stat4-ChIP-Seq(GSE22104)/Homer/NYTTCCWGGAAR	0	1
133	STAT5(Stat)/mCD4+-Stat5-ChIP-Seq(GSE12346)/Homer/RTTTCTNAGAAA	0	1
134	T1ISRE(IRF)/ThioMac-Ifnb-Expression/Homer/ACTTTCGTTTCT	0	1
135	TFE3(bHLH)/MEF-TFE3-ChIP-Seq(GSE75757)/Homer/GTCACGTGACYV	0	1
136	Tlx?(NR)/NPC-H3K4me1-ChIP-Seq(GSE16256)/Homer/CTGGCAGSCTGCCA	0	1
137	USF1(bHLH)/GM12878-Usf1-ChIP-Seq(GSE32465)/Homer/SGTCACGTGR	0	1
138	Usf2(bHLH)/C2C12-Usf2-ChIP-Seq(GSE36030)/Homer/GTCACGTGGT	1	1
139	YY1(Zf)/Promoter/Homer/CAAGATGGCGGC	1	1
140	ZBTB33(Zf)/GM12878-ZBTB33-ChIP-Seq(GSE32465)/Homer/GGVTCTCGCGAGAAC	1	1
141	Zfp281(Zf)/ES-Zfp281-ChIP-Seq(GSE81042)/Homer/CCCCTCCCCCAC	0	1
142	Zfp809(Zf)/ES-Zfp809-ChIP-Seq(GSE70799)/Homer/GGGGCTYGKCTGGGA	1	1
143	Zic(Zf)/Cerebellum-ZIC1.2-ChIP-Seq(GSE60731)/Homer/CCTGCTGAGH	0	1
144	ZNF143|STAF(Zf)/CUTLL-ZNF143-ChIP-Seq(GSE29600)/Homer/ATTTCCCAGVAKSCY	0	1
145	ZNF189(Zf)/HEK293-ZNF189.GFP-ChIP-Seq(GSE58341)/Homer/TGGAACAGMA	0	1
146	ZNF264(Zf)/HEK293-ZNF264.GFP-ChIP-Seq(GSE58341)/Homer/RGGGCACTAACY	0	1
147	ZNF467(Zf)/HEK293-ZNF467.GFP-ChIP-Seq(GSE58341)/Homer/TGGGGAAGGGCM	1	1
148	ZNF519(Zf)/HEK293-ZNF519.GFP-ChIP-Seq(GSE58341)/Homer/GAGSCCGAGC	0	1
149	ZSCAN22(Zf)/HEK293-ZSCAN22.GFP-ChIP-Seq(GSE58341)/Homer/SMCAGTCWGAKGGAGGAGGC	0	1

## Sheet: 3y1_overlap_Motif
universe		A	B
1	AMYB(HTH)/Testes-AMYB-ChIP-Seq(GSE44588)/Homer/TGGCAGTTGG	1	1
2	AP-1(bZIP)/ThioMac-PU.1-ChIP-Seq(GSE21512)/Homer/VTGACTCATC	1	1
3	AP-2alpha(AP2)/Hela-AP2alpha-ChIP-Seq(GSE31477)/Homer/ATGCCCTGAGGC	1	1
4	AP-2gamma(AP2)/MCF7-TFAP2C-ChIP-Seq(GSE21234)/Homer/SCCTSAGGSCAW	1	1
5	Ap4(bHLH)/AML-Tfap4-ChIP-Seq(GSE45738)/Homer/NAHCAGCTGD	1	1
6	ARE(NR)/LNCAP-AR-ChIP-Seq(GSE27824)/Homer/RGRACASNSTGTYCYB	1	1
7	AR-halfsite(NR)/LNCaP-AR-ChIP-Seq(GSE27824)/Homer/CCAGGAACAG	1	1
8	Arnt:Ahr(bHLH)/MCF7-Arnt-ChIP-Seq(Lo_et_al.)/Homer/TBGCACGCAA	1	1
9	Ascl1(bHLH)/NeuralTubes-Ascl1-ChIP-Seq(GSE55840)/Homer/NNVVCAGCTGBN	1	1
10	Atf1(bZIP)/K562-ATF1-ChIP-Seq(GSE31477)/Homer/GATGACGTCA	1	1
11	Atf2(bZIP)/3T3L1-Atf2-ChIP-Seq(GSE56872)/Homer/NRRTGACGTCAT	1	1
12	Atf3(bZIP)/GBM-ATF3-ChIP-Seq(GSE33912)/Homer/DATGASTCATHN	1	1
13	Atf4(bZIP)/MEF-Atf4-ChIP-Seq(GSE35681)/Homer/MTGATGCAAT	1	1
14	Atf7(bZIP)/3T3L1-Atf7-ChIP-Seq(GSE56872)/Homer/NGRTGACGTCAY	1	1
15	Atoh1(bHLH)/Cerebellum-Atoh1-ChIP-Seq(GSE22111)/Homer/VNRVCAGCTGGY	1	1
16	Bach1(bZIP)/K562-Bach1-ChIP-Seq(GSE31477)/Homer/AWWNTGCTGAGTCAT	1	1
17	Bach2(bZIP)/OCILy7-Bach2-ChIP-Seq(GSE44420)/Homer/TGCTGAGTCA	1	1
18	Bapx1(Homeobox)/VertebralCol-Bapx1-ChIP-Seq(GSE36672)/Homer/TTRAGTGSYK	1	1
19	Barx1(Homeobox)/Stomach-Barx1.3xFlag-ChIP-Seq(GSE69483)/Homer/AAACMATTAN	1	1
20	BATF(bZIP)/Th17-BATF-ChIP-Seq(GSE39756)/Homer/DATGASTCAT	1	1
21	Bcl6(Zf)/Liver-Bcl6-ChIP-Seq(GSE31578)/Homer/NNNCTTTCCAGGAAA	1	1
22	bHLHE40(bHLH)/HepG2-BHLHE40-ChIP-Seq(GSE31477)/Homer/KCACGTGMCN	1	1
23	BMAL1(bHLH)/Liver-Bmal1-ChIP-Seq(GSE39860)/Homer/GNCACGTG	1	1
24	BMYB(HTH)/Hela-BMYB-ChIP-Seq(GSE27030)/Homer/NHAACBGYYV	1	1
25	BORIS(Zf)/K562-CTCFL-ChIP-Seq(GSE32465)/Homer/CNNBRGCGCCCCCTGSTGGC	1	1
26	Brachyury(T-box)/Mesoendoderm-Brachyury-ChIP-exo(GSE54963)/Homer/ANTTMRCASBNNNGTGYKAAN	1	1
27	Brn1(POU,Homeobox)/NPC-Brn1-ChIP-Seq(GSE35496)/Homer/TATGCWAATBAV	1	1
28	Brn2(POU,Homeobox)/NPC-Brn2-ChIP-Seq(GSE35496)/Homer/ATGAATATTC	1	1
29	bZIP:IRF(bZIP,IRF)/Th17-BatF-ChIP-Seq(GSE39756)/Homer/NAGTTTCABTHTGACTNW	1	1
30	CArG(MADS)/PUER-Srf-ChIP-Seq(Sullivan_et_al.)/Homer/CCATATATGGNM	1	1
31	Cdx2(Homeobox)/mES-Cdx2-ChIP-Seq(GSE14586)/Homer/GYMATAAAAH	1	1
32	CDX4(Homeobox)/ZebrafishEmbryos-Cdx4.Myc-ChIP-Seq(GSE48254)/Homer/NGYCATAAAWCH	1	1
33	CEBP:AP1(bZIP)/ThioMac-CEBPb-ChIP-Seq(GSE21512)/Homer/DRTGTTGCAA	1	1
34	CEBP(bZIP)/ThioMac-CEBPb-ChIP-Seq(GSE21512)/Homer/ATTGCGCAAC	1	1
35	CEBP:CEBP(bZIP)/MEF-Chop-ChIP-Seq(GSE35681)/Homer/NTNATGCAAYMNNHTGMAAY	1	1
36	Chop(bZIP)/MEF-Chop-ChIP-Seq(GSE35681)/Homer/ATTGCATCAT	1	1
37	CHR(?)/Hela-CellCycle-Expression/Homer/SRGTTTCAAA	1	1
38	c-Jun-CRE(bZIP)/K562-cJun-ChIP-Seq(GSE31477)/Homer/ATGACGTCATCY	1	1
39	CLOCK(bHLH)/Liver-Clock-ChIP-Seq(GSE39860)/Homer/GHCACGTG	1	1
40	c-Myc(bHLH)/LNCAP-cMyc-ChIP-Seq(Unpublished)/Homer/VCCACGTG	1	1
41	c-Myc(bHLH)/mES-cMyc-ChIP-Seq(GSE11431)/Homer/VVCCACGTGG	1	1
42	COUP-TFII(NR)/Artia-Nr2f2-ChIP-Seq(GSE46497)/Homer/AGRGGTCA	1	1
43	CRE(bZIP)/Promoter/Homer/CSGTGACGTCAC	1	1
44	CRX(Homeobox)/Retina-Crx-ChIP-Seq(GSE20012)/Homer/GCTAATCC	1	1
45	CTCF-SatelliteElement(Zf?)/CD4+-CTCF-ChIP-Seq(Barski_et_al.)/Homer/TGCAGTTCCMVNWRTGGCCA	1	1
46	CTCF(Zf)/CD4+-CTCF-ChIP-Seq(Barski_et_al.)/Homer/AYAGTGCCMYCTRGTGGCCA	1	1
47	Cux2(Homeobox)/Liver-Cux2-ChIP-Seq(GSE35985)/Homer/HNRAATCAAT	1	1
48	DMRT1(DM)/Testis-DMRT1-ChIP-Seq(GSE64892)/Homer/TWGHWACAWTGTWDC	1	1
49	DMRT6(DM)/Testis-DMRT6-ChIP-Seq(GSE60440)/Homer/YDGHTACAWTGTADC	1	1
50	DUX4(Homeobox)/Myoblasts-DUX4.V5-ChIP-Seq(GSE75791)/Homer/NWTAAYCYAATCAWN	1	1
51	E2A(bHLH),near_PU.1/Bcell-PU.1-ChIP-Seq(GSE21512)/Homer/NVCACCTGBN	1	1
52	E2A(bHLH)/proBcell-E2A-ChIP-Seq(GSE21978)/Homer/DNRCAGCTGY	1	1
53	E2F1(E2F)/Hela-E2F1-ChIP-Seq(GSE22478)/Homer/CWGGCGGGAA	1	1
54	E2F3(E2F)/MEF-E2F3-ChIP-Seq(GSE71376)/Homer/BTKGGCGGGAAA	1	1
55	E2F4(E2F)/K562-E2F4-ChIP-Seq(GSE31477)/Homer/GGCGGGAAAH	1	1
56	E2F6(E2F)/Hela-E2F6-ChIP-Seq(GSE31477)/Homer/GGCGGGAARN	1	1
57	E2F7(E2F)/Hela-E2F7-ChIP-Seq(GSE32673)/Homer/VDTTTCCCGCCA	1	1
58	E2F(E2F)/Hela-CellCycle-Expression/Homer/TTSGCGCGAAAA	1	1
59	EBF1(EBF)/Near-E2A-ChIP-Seq(GSE21512)/Homer/GTCCCCWGGGGA	1	1
60	EBF(EBF)/proBcell-EBF-ChIP-Seq(GSE21978)/Homer/DGTCCCYRGGGA	1	1
61	EBNA1(EBV-virus)/Raji-EBNA1-ChIP-Seq(GSE30709)/Homer/GGYAGCAYDTGCTDCCCNNN	1	1
62	E-box(bHLH)/Promoter/Homer/SSGGTCACGTGA	1	1
63	Egr1(Zf)/K562-Egr1-ChIP-Seq(GSE32465)/Homer/TGCGTGGGYG	1	1
64	Egr2(Zf)/Thymocytes-Egr2-ChIP-Seq(GSE34254)/Homer/NGCGTGGGCGGR	1	1
65	EHF(ETS)/LoVo-EHF-ChIP-Seq(GSE49402)/Homer/AVCAGGAAGT	1	1
66	EKLF(Zf)/Erythrocyte-Klf1-ChIP-Seq(GSE20478)/Homer/NWGGGTGTGGCY	1	1
67	ELF1(ETS)/Jurkat-ELF1-ChIP-Seq(SRA014231)/Homer/AVCCGGAAGT	1	1
68	ELF3(ETS)/PDAC-ELF3-ChIP-Seq(GSE64557)/Homer/ANCAGGAAGT	1	1
69	ELF5(ETS)/T47D-ELF5-ChIP-Seq(GSE30407)/Homer/ACVAGGAAGT	1	1
70	Elk1(ETS)/Hela-Elk1-ChIP-Seq(GSE31477)/Homer/HACTTCCGGY	1	1
71	Elk4(ETS)/Hela-Elk4-ChIP-Seq(GSE31477)/Homer/NRYTTCCGGY	1	1
72	Eomes(T-box)/H9-Eomes-ChIP-Seq(GSE26097)/Homer/ATTAACACCT	1	1
73	ERE(NR),IR3/MCF7-ERa-ChIP-Seq(Unpublished)/Homer/VAGGTCACNSTGACC	1	1
74	ERG(ETS)/VCaP-ERG-ChIP-Seq(GSE14097)/Homer/ACAGGAAGTG	1	1
75	Erra(NR)/HepG2-Erra-ChIP-Seq(GSE31477)/Homer/CAAAGGTCAG	1	1
76	Esrrb(NR)/mES-Esrrb-ChIP-Seq(GSE11431)/Homer/KTGACCTTGA	1	1
77	Ets1-distal(ETS)/CD4+-PolII-ChIP-Seq(Barski_et_al.)/Homer/MACAGGAAGT	1	1
78	ETS1(ETS)/Jurkat-ETS1-ChIP-Seq(GSE17954)/Homer/ACAGGAAGTG	1	1
79	ETS:E-box(ETS,bHLH)/HPC7-Scl-ChIP-Seq(GSE22178)/Homer/AGGAARCAGCTG	1	1
80	ETS(ETS)/Promoter/Homer/AACCGGAAGT	1	1
81	ETS:RUNX(ETS,Runt)/Jurkat-RUNX1-ChIP-Seq(GSE17954)/Homer/RCAGGATGTGGT	1	1
82	ETV1(ETS)/GIST48-ETV1-ChIP-Seq(GSE22441)/Homer/AACCGGAAGT	1	1
83	Etv2(ETS)/ES-ER71-ChIP-Seq(GSE59402)/Homer(0.967)/NNAYTTCCTGHN	1	1
84	EWS:ERG-fusion(ETS)/CADO_ES1-EWS:ERG-ChIP-Seq(SRA014231)/Homer/ATTTCCTGTN	1	1
85	EWS:FLI1-fusion(ETS)/SK_N_MC-EWS:FLI1-ChIP-Seq(SRA014231)/Homer/VACAGGAAAT	1	1
86	Fli1(ETS)/CD8-FLI-ChIP-Seq(GSE20898)/Homer/NRYTTCCGGH	1	1
87	Fosl2(bZIP)/3T3L1-Fosl2-ChIP-Seq(GSE56872)/Homer/NATGASTCABNN	1	1
88	FOXA1:AR(Forkhead,NR)/LNCAP-AR-ChIP-Seq(GSE27824)/Homer/AGTAAACAAAAAAGAACAND	1	1
89	FOXA1(Forkhead)/LNCAP-FOXA1-ChIP-Seq(GSE27824)/Homer/WAAGTAAACA	1	1
90	FOXA1(Forkhead)/MCF7-FOXA1-ChIP-Seq(GSE26831)/Homer/WAAGTAAACA	1	1
91	Foxa2(Forkhead)/Liver-Foxa2-ChIP-Seq(GSE25694)/Homer/CYTGTTTACWYW	1	1
92	Foxa3(Forkhead)/Liver-Foxa3-ChIP-Seq(GSE77670)/Homer/BSNTGTTTACWYWGN	1	1
93	Fox:Ebox(Forkhead,bHLH)/Panc1-Foxa2-ChIP-Seq(GSE47459)/Homer/NNNVCTGWGYAAACASN	1	1
94	Foxf1(Forkhead)/Lung-Foxf1-ChIP-Seq(GSE77951)/Homer/WWATRTAAACAN	1	1
95	Foxh1(Forkhead)/hESC-FOXH1-ChIP-Seq(GSE29422)/Homer/NNTGTGGATTSS	1	1
96	FOXK1(Forkhead)/HEK293-FOXK1-ChIP-Seq(GSE51673)/Homer/NVWTGTTTAC	1	1
97	FOXK2(Forkhead)/U2OS-FOXK2-ChIP-Seq(E-MTAB-2204)/Homer/SCHTGTTTACAT	1	1
98	FoxL2(Forkhead)/Ovary-FoxL2-ChIP-Seq(GSE60858)/Homer/WWTRTAAACAVG	1	1
99	FOXM1(Forkhead)/MCF7-FOXM1-ChIP-Seq(GSE72977)/Homer/TRTTTACTTW	1	1
100	Foxo1(Forkhead)/RAW-Foxo1-ChIP-Seq(Fan_et_al.)/Homer/CTGTTTAC	1	1
101	Foxo3(Forkhead)/U2OS-Foxo3-ChIP-Seq(E-MTAB-2701)/Homer/DGTAAACA	1	1
102	FOXP1(Forkhead)/H9-FOXP1-ChIP-Seq(GSE31006)/Homer/NYYTGTTTACHN	1	1
103	Fra1(bZIP)/BT549-Fra1-ChIP-Seq(GSE46166)/Homer/NNATGASTCATH	1	1
104	Fra2(bZIP)/Striatum-Fra2-ChIP-Seq(GSE43429)/Homer/GGATGACTCATC	1	1
105	FXR(NR),IR1/Liver-FXR-ChIP-Seq(Chong_et_al.)/Homer/AGGTCANTGACCTB	1	1
106	GABPA(ETS)/Jurkat-GABPa-ChIP-Seq(GSE17954)/Homer/RACCGGAAGT	1	1
107	Gata1(Zf)/K562-GATA1-ChIP-Seq(GSE18829)/Homer/SAGATAAGRV	1	1
108	Gata2(Zf)/K562-GATA2-ChIP-Seq(GSE18829)/Homer/BBCTTATCTS	1	1
109	GATA3(Zf),DR4/iTreg-Gata3-ChIP-Seq(GSE20898)/Homer/AGATGKDGAGATAAG	1	1
110	GATA3(Zf),DR8/iTreg-Gata3-ChIP-Seq(GSE20898)/Homer/AGATSTNDNNDSAGATAASN	1	1
111	GATA3(Zf)/iTreg-Gata3-ChIP-Seq(GSE20898)/Homer/AGATAASR	1	1
112	Gata4(Zf)/Heart-Gata4-ChIP-Seq(GSE35151)/Homer/NBWGATAAGR	1	1
113	Gata6(Zf)/HUG1N-GATA6-ChIP-Seq(GSE51936)/Homer/YCTTATCTBN	1	1
114	GATA:SCL(Zf,bHLH)/Ter119-SCL-ChIP-Seq(GSE18720)/Homer/CRGCTGBNGNSNNSAGATAA	1	1
115	GATA(Zf),IR3/iTreg-Gata3-ChIP-Seq(GSE20898)/Homer/NNNNNBAGATAWYATCTVHN	1	1
116	GATA(Zf),IR4/iTreg-Gata3-ChIP-Seq(GSE20898)/Homer/NAGATWNBNATCTNN	1	1
117	Gfi1b(Zf)/HPC7-Gfi1b-ChIP-Seq(GSE22178)/Homer/MAATCACTGC	1	1
118	GFX(?)/Promoter/Homer/ATTCTCGCGAGA	1	1
119	GFY(?)/Promoter/Homer/ACTACAATTCCC	1	1
120	GFY-Staf(?,Zf)/Promoter/Homer/RACTACAATTCCCAGAAKGC	1	1
121	GLI3(Zf)/Limb-GLI3-ChIP-Chip(GSE11077)/Homer/CGTGGGTGGTCC	1	1
122	GRE(NR),IR3/A549-GR-ChIP-Seq(GSE32465)/Homer/NRGVACABNVTGTYCY	1	1
123	GRE(NR),IR3/RAW264.7-GRE-ChIP-Seq(Unpublished)/Homer/VAGRACAKWCTGTYC	1	1
124	GRHL2(CP2)/HBE-GRHL2-ChIP-Seq(GSE46194)/Homer/AAACYKGTTWDACMRGTTTB	1	1
125	GSC(Homeobox)/FrogEmbryos-GSC-ChIP-Seq(DRA000576)/Homer/RGGATTAR	1	1
126	Hand2(bHLH)/Mesoderm-Hand2-ChIP-Seq(GSE61475)/Homer/TGACANARRCCAGRC	1	1
127	HEB(bHLH)/mES-Heb-ChIP-Seq(GSE53233)/Homer/VCAGCTGBNN	1	1
128	HIF-1a(bHLH)/MCF7-HIF1a-ChIP-Seq(GSE28352)/Homer/TACGTGCV	1	1
129	HIF-1b(HLH)/T47D-HIF1b-ChIP-Seq(GSE59937)/Homer/RTACGTGC	1	1
130	HIF2a(bHLH)/785_O-HIF2a-ChIP-Seq(GSE34871)/Homer/GCACGTACCC	1	1
131	HLF(bZIP)/HSC-HLF.Flag-ChIP-Seq(GSE69817)/Homer/RTTATGYAAB	1	1
132	HNF1b(Homeobox)/PDAC-HNF1B-ChIP-Seq(GSE64557)/Homer/GTTAATNATTAA	1	1
133	Hnf1(Homeobox)/Liver-Foxa2-Chip-Seq(GSE25694)/Homer/GGTTAAWCATTAA	1	1
134	HNF4a(NR),DR1/HepG2-HNF4a-ChIP-Seq(GSE25021)/Homer/CARRGKBCAAAGTYCA	1	1
135	HNF6(Homeobox)/Liver-Hnf6-ChIP-Seq(ERP000394)/Homer/NTATYGATCH	1	1
136	HOXA2(Homeobox)/mES-Hoxa2-ChIP-Seq(Donaldson_et_al.)/Homer/GYCATCMATCAT	1	1
137	HOXA9(Homeobox)/HSC-Hoxa9-ChIP-Seq(GSE33509)/Homer/GGCCATAAATCA	1	1
138	HOXB13(Homeobox)/ProstateTumor-HOXB13-ChIP-Seq(GSE56288)/Homer/TTTTATKRGG	1	1
139	Hoxb4(Homeobox)/ES-Hoxb4-ChIP-Seq(GSE34014)/Homer/TGATTRATGGCY	1	1
140	Hoxc9(Homeobox)/Ainv15-Hoxc9-ChIP-Seq(GSE21812)/Homer/GGCCATAAATCA	1	1
141	HOXD13(Homeobox)/Chicken-Hoxd13-ChIP-Seq(GSE38910)/Homer/NCYAATAAAA	1	1
142	HRE(HSF)/HepG2-HSF1-ChIP-Seq(GSE31477)/Homer/BSTTCTRGAABVTTCYAGAA	1	1
143	HRE(HSF)/Striatum-HSF1-ChIP-Seq(GSE38000)/Homer/TTCTAGAABNTTCTA	1	1
144	IRF1(IRF)/PBMC-IRF1-ChIP-Seq(GSE43036)/Homer/GAAAGTGAAAGT	1	1
145	IRF2(IRF)/Erythroblas-IRF2-ChIP-Seq(GSE36985)/Homer/GAAASYGAAASY	1	1
146	IRF3(IRF)/BMDM-Irf3-ChIP-Seq(GSE67343)/Homer/AGTTTCAKTTTC	1	1
147	IRF4(IRF)/GM12878-IRF4-ChIP-Seq(GSE32465)/Homer/ACTGAAACCA	1	1
148	IRF8(IRF)/BMDM-IRF8-ChIP-Seq(GSE77884)/Homer/GRAASTGAAAST	1	1
149	IRF:BATF(IRF:bZIP)/pDC-Irf8-ChIP-Seq(GSE66899)/Homer/CTTTCANTATGACTV	1	1
150	Isl1(Homeobox)/Neuron-Isl1-ChIP-Seq(GSE31456)/Homer/CTAATKGV	1	1
151	ISRE(IRF)/ThioMac-LPS-Expression(GSE23622)/Homer/AGTTTCASTTTC	1	1
152	Jun-AP1(bZIP)/K562-cJun-ChIP-Seq(GSE31477)/Homer/GATGASTCATCN	1	1
153	JunB(bZIP)/DendriticCells-Junb-ChIP-Seq(GSE36099)/Homer/RATGASTCAT	1	1
154	JunD(bZIP)/K562-JunD-ChIP-Seq/Homer/ATGACGTCATCN	1	1
155	KLF10(Zf)/HEK293-KLF10.GFP-ChIP-Seq(GSE58341)/Homer/GGGGGTGTGTCC	1	1
156	KLF14(Zf)/HEK293-KLF14.GFP-ChIP-Seq(GSE58341)/Homer/RGKGGGCGKGGC	1	1
157	KLF3(Zf)/MEF-Klf3-ChIP-Seq(GSE44748)/Homer/NRGCCCCRCCCHBNN	1	1
158	Klf4(Zf)/mES-Klf4-ChIP-Seq(GSE11431)/Homer/GCCACACCCA	1	1
159	KLF5(Zf)/LoVo-KLF5-ChIP-Seq(GSE49402)/Homer/DGGGYGKGGC	1	1
160	KLF6(Zf)/PDAC-KLF6-ChIP-Seq(GSE64557)/Homer/MKGGGYGTGGCC	1	1
161	Klf9(Zf)/GBM-Klf9-ChIP-Seq(GSE62211)/Homer/GCCACRCCCACY	1	1
162	Lhx1(Homeobox)/EmbryoCarcinoma-Lhx1-ChIP-Seq(GSE70957)/Homer/NNYTAATTAR	1	1
163	Lhx2(Homeobox)/HFSC-Lhx2-ChIP-Seq(GSE48068)/Homer/TAATTAGN	1	1
164	Lhx3(Homeobox)/Neuron-Lhx3-ChIP-Seq(GSE31456)/Homer/ADBTAATTAR	1	1
165	LRF(Zf)/Erythroblasts-ZBTB7A-ChIP-Seq(GSE74977)/Homer/AAGACCCYYN	1	1
166	LXRE(NR),DR4/RAW-LXRb.biotin-ChIP-Seq(GSE21512)/Homer/RGGTTACTANAGGTCA	1	1
167	MafA(bZIP)/Islet-MafA-ChIP-Seq(GSE30298)/Homer/TGCTGACTCA	1	1
168	MafB(bZIP)/BMM-Mafb-ChIP-Seq(GSE75722)/Homer/WNTGCTGASTCAGCANWTTY	1	1
169	MafF(bZIP)/HepG2-MafF-ChIP-Seq(GSE31477)/Homer/HWWGTCAGCAWWTTT	1	1
170	MafK(bZIP)/C2C12-MafK-ChIP-Seq(GSE36030)/Homer/GCTGASTCAGCA	1	1
171	Max(bHLH)/K562-Max-ChIP-Seq(GSE31477)/Homer/RCCACGTGGYYN	1	1
172	Maz(Zf)/HepG2-Maz-ChIP-Seq(GSE31477)/Homer/GGGGGGGG	1	1
173	Mef2a(MADS)/HL1-Mef2a.biotin-ChIP-Seq(GSE21529)/Homer/CYAAAAATAG	1	1
174	Mef2b(MADS)/HEK293-Mef2b.V5-ChIP-Seq(GSE67450)/Homer/GCTATTTTTGGM	1	1
175	Mef2c(MADS)/GM12878-Mef2c-ChIP-Seq(GSE32465)/Homer/DCYAAAAATAGM	1	1
176	Mef2d(MADS)/Retina-Mef2d-ChIP-Seq(GSE61391)/Homer/GCTATTTTTAGC	1	1
177	Meis1(Homeobox)/MastCells-Meis1-ChIP-Seq(GSE48085)/Homer/VGCTGWCAVB	1	1
178	MITF(bHLH)/MastCells-MITF-ChIP-Seq(GSE48085)/Homer/RTCATGTGAC	1	1
179	Mouse_Recombination_Hotspot(Zf)/Testis-DMC1-ChIP-Seq(GSE24438)/Homer/ACTYKNATTCGTGNTACTTC	1	1
180	MYB(HTH)/ERMYB-Myb-ChIPSeq(GSE22095)/Homer/GGCVGTTR	1	1
181	Myf5(bHLH)/GM-Myf5-ChIP-Seq(GSE24852)/Homer/BAACAGCTGT	1	1
182	MyoD(bHLH)/Myotube-MyoD-ChIP-Seq(GSE21614)/Homer/RRCAGCTGYTSY	1	1
183	MyoG(bHLH)/C2C12-MyoG-ChIP-Seq(GSE36024)/Homer/AACAGCTG	1	1
184	Nanog(Homeobox)/mES-Nanog-ChIP-Seq(GSE11724)/Homer/RGCCATTAAC	1	1
185	NeuroD1(bHLH)/Islet-NeuroD1-ChIP-Seq(GSE30298)/Homer/GCCATCTGTT	1	1
186	NeuroG2(bHLH)/Fibroblast-NeuroG2-ChIP-Seq(GSE75910)/Homer/ACCATCTGTT	1	1
187	NF1(CTF)/LNCAP-NF1-ChIP-Seq(Unpublished)/Homer/CYTGGCABNSTGCCAR	1	1
188	NF1:FOXA1(CTF,Forkhead)/LNCAP-FOXA1-ChIP-Seq(GSE27824)/Homer/WNTGTTTRYTTTGGCA	1	1
189	NF1-halfsite(CTF)/LNCaP-NF1-ChIP-Seq(Unpublished)/Homer/YTGCCAAG	1	1
190	NFAT:AP1(RHD,bZIP)/Jurkat-NFATC1-ChIP-Seq(Jolma_et_al.)/Homer/SARTGGAAAAWRTGAGTCAB	1	1
191	NFAT(RHD)/Jurkat-NFATC1-ChIP-Seq(Jolma_et_al.)/Homer/ATTTTCCATT	1	1
192	NF-E2(bZIP)/K562-NFE2-ChIP-Seq(GSE31477)/Homer/GATGACTCAGCA	1	1
193	NFkB-p50,p52(RHD)/Monocyte-p50-ChIP-Chip(Schreiber_et_al.)/Homer/GGGGGAATCCCC	1	1
194	NFkB-p65-Rel(RHD)/ThioMac-LPS-Expression(GSE23622)/Homer/GGAAATTCCC	1	1
195	NFkB-p65(RHD)/GM12787-p65-ChIP-Seq(GSE19485)/Homer/WGGGGATTTCCC	1	1
196	NFY(CCAAT)/Promoter/Homer/RGCCAATSRG	1	1
197	Nkx2.1(Homeobox)/LungAC-Nkx2.1-ChIP-Seq(GSE43252)/Homer/RSCACTYRAG	1	1
198	Nkx2.2(Homeobox)/NPC-Nkx2.2-ChIP-Seq(GSE61673)/Homer/BTBRAGTGSN	1	1
199	Nkx2.5(Homeobox)/HL1-Nkx2.5.biotin-ChIP-Seq(GSE21529)/Homer/RRSCACTYAA	1	1
200	Nkx3.1(Homeobox)/LNCaP-Nkx3.1-ChIP-Seq(GSE28264)/Homer/AAGCACTTAA	1	1
201	Nkx6.1(Homeobox)/Islet-Nkx6.1-ChIP-Seq(GSE40975)/Homer/GKTAATGR	1	1
202	n-Myc(bHLH)/mES-nMyc-ChIP-Seq(GSE11431)/Homer/VRCCACGTGG	1	1
203	NPAS2(bHLH)/Liver-NPAS2-ChIP-Seq(GSE39860)/Homer/KCCACGTGAC	1	1
204	NPAS(bHLH)/Liver-NPAS-ChIP-Seq(GSE39860)/Homer/NVCACGTG	1	1
205	Nr5a2(NR)/mES-Nr5a2-ChIP-Seq(GSE19019)/Homer/BTCAAGGTCA	1	1
206	Nr5a2(NR)/Pancreas-LRH1-ChIP-Seq(GSE34295)/Homer/BTCAAGGTCA	1	1
207	NRF1(NRF)/MCF7-NRF1-ChIP-Seq(Unpublished)/Homer/CTGCGCATGCGC	1	1
208	Nrf2(bZIP)/Lymphoblast-Nrf2-ChIP-Seq(GSE37589)/Homer/HTGCTGAGTCAT	1	1
209	NRF(NRF)/Promoter/Homer/STGCGCATGCGC	1	1
210	Nur77(NR)/K562-NR4A1-ChIP-Seq(GSE31363)/Homer/TGACCTTTNCNT	1	1
211	Oct2(POU,Homeobox)/Bcell-Oct2-ChIP-Seq(GSE21512)/Homer/ATATGCAAAT	1	1
212	Oct4(POU,Homeobox)/mES-Oct4-ChIP-Seq(GSE11431)/Homer/ATTTGCATAW	1	1
213	Oct4:Sox17(POU,Homeobox,HMG)/F9-Sox17-ChIP-Seq(GSE44553)/Homer/CCATTGTATGCAAAT	1	1
214	OCT4-SOX2-TCF-NANOG(POU,Homeobox,HMG)/mES-Oct4-ChIP-Seq(GSE11431)/Homer/ATTTGCATAACAATG	1	1
215	Oct6(POU,Homeobox)/NPC-Pou3f1-ChIP-Seq(GSE35496)/Homer/WATGCAAATGAG	1	1
216	OCT:OCT(POU,Homeobox,IR1)/NPC-Brn2-ChIP-Seq(GSE35496)/Homer/ATGAATWATTCATGA	1	1
217	OCT:OCT(POU,Homeobox)/NPC-Brn1-ChIP-Seq(GSE35496)/Homer/ATGAATATTCATGAG	1	1
218	OCT:OCT(POU,Homeobox)/NPC-OCT6-ChIP-Seq(GSE43916)/Homer/YATGCATATRCATRT	1	1
219	OCT:OCT-short(POU,Homeobox)/NPC-OCT6-ChIP-Seq(GSE43916)/Homer/ATGCATWATGCATRW	1	1
220	Olig2(bHLH)/Neuron-Olig2-ChIP-Seq(GSE30882)/Homer/RCCATMTGTT	1	1
221	Otx2(Homeobox)/EpiLC-Otx2-ChIP-Seq(GSE56098)/Homer/NYTAATCCYB	1	1
222	p53(p53)/mES-cMyc-ChIP-Seq(GSE11431)/Homer/ACATGCCCGGGCAT	1	1
223	p53(p53)/Saos-p53-ChIP-Seq(GSE15780)/Homer/RRCATGYCYRGRCATGYYYN	1	1
224	p53(p53)/Saos-p53-ChIP-Seq/Homer/RRCATGYCYRGRCATGYYYN	1	1
225	p63(p53)/Keratinocyte-p63-ChIP-Seq(GSE17611)/Homer/NNDRCATGYCYNRRCATGYH	1	1
226	p73(p53)/Trachea-p73-ChIP-Seq(PRJNA310161)/Homer/NRRRCAWGTCCDGRCATGYY	1	1
227	PAX3:FKHR-fusion(Paired,Homeobox)/Rh4-PAX3:FKHR-ChIP-Seq(GSE19063)/Homer/ACCRTGACTAATTNN	1	1
228	PAX5(Paired,Homeobox),condensed/GM12878-PAX5-ChIP-Seq(GSE32465)/Homer/GTCACGCTCSCTGM	1	1
229	PAX5(Paired,Homeobox)/GM12878-PAX5-ChIP-Seq(GSE32465)/Homer/GCAGCCAAGCRTGACH	1	1
230	PAX6(Paired,Homeobox)/Forebrain-Pax6-ChIP-Seq(GSE66961)/Homer/NGTGTTCAVTSAAGCGKAAA	1	1
231	Pax7(Paired,Homeobox),longest/Myoblast-Pax7-ChIP-Seq(GSE25064)/Homer/NTAATTDGCYAATTANNWWD	1	1
232	Pax7(Paired,Homeobox),long/Myoblast-Pax7-ChIP-Seq(GSE25064)/Homer/TAATCHGATTAC	1	1
233	Pax7(Paired,Homeobox)/Myoblast-Pax7-ChIP-Seq(GSE25064)/Homer/TAATCAATTA	1	1
234	Pax8(Paired,Homeobox)/Thyroid-Pax8-ChIP-Seq(GSE26938)/Homer/GTCATGCHTGRCTGS	1	1
235	PBX1(Homeobox)/MCF7-PBX1-ChIP-Seq(GSE28007)/Homer/GSCTGTCACTCA	1	1
236	Pbx3(Homeobox)/GM12878-PBX3-ChIP-Seq(GSE32465)/Homer/SCTGTCAMTCAN	1	1
237	Pdx1(Homeobox)/Islet-Pdx1-ChIP-Seq(SRA008281)/Homer/YCATYAATCA	1	1
238	PGR(NR)/EndoStromal-PGR-ChIP-Seq(GSE69539)/Homer/AAGAACATWHTGTTC	1	1
239	Phox2a(Homeobox)/Neuron-Phox2a-ChIP-Seq(GSE31456)/Homer/YTAATYNRATTA	1	1
240	Pit1+1bp(Homeobox)/GCrat-Pit1-ChIP-Seq(GSE58009)/Homer/ATGCATAATTCA	1	1
241	Pit1(Homeobox)/GCrat-Pit1-ChIP-Seq(GSE58009)/Homer/ATGMATATDC	1	1
242	Pitx1:Ebox(Homeobox,bHLH)/Hindlimb-Pitx1-ChIP-Seq(GSE41591)/Homer/YTAATTRAWWCCAGATGT	1	1
243	Pitx1(Homeobox)/Chicken-Pitx1-ChIP-Seq(GSE38910)/Homer/TAATCCCN	1	1
244	Pknox1(Homeobox)/ES-Prep1-ChIP-Seq(GSE63282)/Homer/SCTGTCAVTCAV	1	1
245	PPARE(NR),DR1/3T3L1-Pparg-ChIP-Seq(GSE13511)/Homer/TGACCTTTGCCCCA	1	1
246	PRDM14(Zf)/H1-PRDM14-ChIP-Seq(GSE22767)/Homer/RGGTCTCTAACY	1	1
247	PRDM1(Zf)/Hela-PRDM1-ChIP-Seq(GSE31477)/Homer/ACTTTCACTTTC	1	1
248	PRDM9(Zf)/Testis-DMC1-ChIP-Seq(GSE35498)/Homer/ADGGYAGYAGCATCT	1	1
249	PR(NR)/T47D-PR-ChIP-Seq(GSE31130)/Homer/VAGRACAKNCTGTBC	1	1
250	Prop1(Homeobox)/GHFT1-PROP1.biotin-ChIP-Seq(GSE77302)/Homer/NTAATBNAATTA	1	1
251	Ptf1a(bHLH)/Panc1-Ptf1a-ChIP-Seq(GSE47459)/Homer/ACAGCTGTTN	1	1
252	PU.1(ETS)/ThioMac-PU.1-ChIP-Seq(GSE21512)/Homer/AGAGGAAGTG	1	1
253	PU.1:IRF8(ETS:IRF)/pDC-Irf8-ChIP-Seq(GSE66899)/Homer/GGAAGTGAAAST	1	1
254	PU.1-IRF(ETS:IRF)/Bcell-PU.1-ChIP-Seq(GSE21512)/Homer/MGGAAGTGAAAC	1	1
255	RARg(NR)/ES-RARg-ChIP-Seq(GSE30538)/Homer/AGGTCAAGGTCA	1	1
256	RAR:RXR(NR),DR5/ES-RAR-ChIP-Seq(GSE56893)/Homer/AGGTCAAGGTCA	1	1
257	RAR:RXR(NR),DR5/ES-RAR-ChIP-Seq(GSE56893)/Homer/RGGTCADNNAGAGGTCAV	1	1
258	Rbpj1(?)/Panc1-Rbpj1-ChIP-Seq(GSE47459)/Homer/HTTTCCCASG	1	1
259	RBPJ:Ebox(?,bHLH)/Panc1-Rbpj1-ChIP-Seq(GSE47459)/Homer/GGGRAARRGRMCAGMTG	1	1
260	REST-NRSF(Zf)/Jurkat-NRSF-ChIP-Seq/Homer/GGMGCTGTCCATGGTGCTGA	1	1
261	Reverb(NR),DR2/RAW-Reverba.biotin-ChIP-Seq(GSE45914)/Homer/GTRGGTCASTGGGTCA	1	1
262	Rfx1(HTH)/NPC-H3K4me1-ChIP-Seq(GSE16256)/Homer/KGTTGCCATGGCAA	1	1
263	Rfx2(HTH)/LoVo-RFX2-ChIP-Seq(GSE49402)/Homer/GTTGCCATGGCAACM	1	1
264	Rfx5(HTH)/GM12878-Rfx5-ChIP-Seq(GSE31477)/Homer/SCCTAGCAACAG	1	1
265	Rfx6(HTH)/Min6b1-Rfx6.HA-ChIP-Seq(GSE62844)/Homer/TGTTKCCTAGCAACM	1	1
266	RFX(HTH)/K562-RFX3-ChIP-Seq(SRA012198)/Homer/CGGTTGCCATGGCAAC	1	1
267	Ronin(THAP)/ES-Thap11-ChIP-Seq(GSE51522)/Homer/RACTACAACTCCCAGVAKGC	1	1
268	RORgt(NR)/EL4-RORgt.Flag-ChIP-Seq(GSE56019)/Homer/AAYTAGGTCA	1	1
269	RUNX1(Runt)/Jurkat-RUNX1-ChIP-Seq(GSE29180)/Homer/AAACCACARM	1	1
270	RUNX2(Runt)/PCa-RUNX2-ChIP-Seq(GSE33889)/Homer/NWAACCACADNN	1	1
271	RUNX-AML(Runt)/CD4+-PolII-ChIP-Seq(Barski_et_al.)/Homer/GCTGTGGTTW	1	1
272	RUNX(Runt)/HPC7-Runx1-ChIP-Seq(GSE22178)/Homer/SAAACCACAG	1	1
273	RXR(NR),DR1/3T3L1-RXR-ChIP-Seq(GSE13511)/Homer/TAGGGCAAAGGTCA	1	1
274	SCL(bHLH)/HPC7-Scl-ChIP-Seq(GSE13511)/Homer/AVCAGCTG	1	1
275	SF1(NR)/H295R-Nr5a1-ChIP-Seq(GSE44220)/Homer/CAAGGHCANV	1	1
276	Six1(Homeobox)/Myoblast-Six1-ChIP-Chip(GSE20150)/Homer/GKVTCADRTTWC	1	1
277	Six2(Homeobox)/NephronProgenitor-Six2-ChIP-Seq(GSE39837)/Homer/GWAAYHTGAKMC	1	1
278	Slug(Zf)/Mesoderm-Snai2-ChIP-Seq(GSE61475)/Homer/SNGCACCTGCHS	1	1
279	Smad2(MAD)/ES-SMAD2-ChIP-Seq(GSE29422)/Homer/CTGTCTGG	1	1
280	Smad3(MAD)/NPC-Smad3-ChIP-Seq(GSE36673)/Homer/TWGTCTGV	1	1
281	Smad4(MAD)/ESC-SMAD4-ChIP-Seq(GSE29422)/Homer/VBSYGTCTGG	1	1
282	Sox10(HMG)/SciaticNerve-Sox3-ChIP-Seq(GSE35132)/Homer/CCWTTGTYYB	1	1
283	Sox15(HMG)/CPA-Sox15-ChIP-Seq(GSE62909)/Homer/RAACAATGGN	1	1
284	Sox17(HMG)/Endoderm-Sox17-ChIP-Seq(GSE61475)/Homer/CCATTGTTYB	1	1
285	Sox2(HMG)/mES-Sox2-ChIP-Seq(GSE11431)/Homer/BCCATTGTTC	1	1
286	Sox3(HMG)/NPC-Sox3-ChIP-Seq(GSE33059)/Homer/CCWTTGTY	1	1
287	Sox4(HMG)/proB-Sox4-ChIP-Seq(GSE50066)/Homer/YCTTTGTTCC	1	1
288	Sox6(HMG)/Myotubes-Sox6-ChIP-Seq(GSE32627)/Homer/CCATTGTTNY	1	1
289	Sox9(HMG)/Limb-SOX9-ChIP-Seq(GSE73225)/Homer/AGGVNCCTTTGT	1	1
290	Sp1(Zf)/Promoter/Homer/GGCCCCGCCCCC	1	1
291	Sp5(Zf)/mES-Sp5.Flag-ChIP-Seq(GSE72989)/Homer/RGKGGGCGGAGC	1	1
292	SPDEF(ETS)/VCaP-SPDEF-ChIP-Seq(SRA014231)/Homer/ASWTCCTGBT	1	1
293	SpiB(ETS)/OCILY3-SPIB-ChIP-Seq(GSE56857)/Homer/AAAGRGGAAGTG	1	1
294	Srebp1a(bHLH)/HepG2-Srebp1a-ChIP-Seq(GSE31477)/Homer/RTCACSCCAY	1	1
295	Srebp2(bHLH)/HepG2-Srebp2-ChIP-Seq(GSE31477)/Homer/CGGTCACSCCAC	1	1
296	STAT1(Stat)/HelaS3-STAT1-ChIP-Seq(GSE12782)/Homer/NATTTCCNGGAAAT	1	1
297	Stat3+il21(Stat)/CD4-Stat3-ChIP-Seq(GSE19198)/Homer/SVYTTCCNGGAARB	1	1
298	Stat3(Stat)/mES-Stat3-ChIP-Seq(GSE11431)/Homer/CTTCCGGGAA	1	1
299	STAT4(Stat)/CD4-Stat4-ChIP-Seq(GSE22104)/Homer/NYTTCCWGGAAR	1	1
300	STAT5(Stat)/mCD4+-Stat5-ChIP-Seq(GSE12346)/Homer/RTTTCTNAGAAA	1	1
301	STAT6(Stat)/CD4-Stat6-ChIP-Seq(GSE22104)/Homer/ABTTCYYRRGAA	1	1
302	STAT6(Stat)/Macrophage-Stat6-ChIP-Seq(GSE38377)/Homer/TTCCKNAGAA	1	1
303	T1ISRE(IRF)/ThioMac-Ifnb-Expression/Homer/ACTTTCGTTTCT	1	1
304	TATA-Box(TBP)/Promoter/Homer/CCTTTTAWAGSC	1	1
305	Tbet(T-box)/CD8-Tbet-ChIP-Seq(GSE33802)/Homer/AGGTGTGAAM	1	1
306	Tbox:Smad(T-box,MAD)/ESCd5-Smad2_3-ChIP-Seq(GSE29422)/Homer/AGGTGHCAGACA	1	1
307	Tbr1(T-box)/Cortex-Tbr1-ChIP-Seq(GSE71384)/Homer/AAGGTGTKAA	1	1
308	Tbx20(T-box)/Heart-Tbx20-ChIP-Seq(GSE29636)/Homer/GGTGYTGACAGS	1	1
309	Tbx5(T-box)/HL1-Tbx5.biotin-ChIP-Seq(GSE21529)/Homer/AGGTGTCA	1	1
310	Tcf12(bHLH)/GM12878-Tcf12-ChIP-Seq(GSE32465)/Homer/VCAGCTGYTG	1	1
311	Tcf21(bHLH)/ArterySmoothMuscle-Tcf21-ChIP-Seq(GSE61369)/Homer/NAACAGCTGG	1	1
312	Tcf3(HMG)/mES-Tcf3-ChIP-Seq(GSE11724)/Homer/ASWTCAAAGG	1	1
313	Tcf4(HMG)/Hct116-Tcf4-ChIP-Seq(SRA012054)/Homer/ASATCAAAGGVA	1	1
314	Tcfcp2l1(CP2)/mES-Tcfcp2l1-ChIP-Seq(GSE11431)/Homer/NRAACCRGTTYRAACCRGYT	1	1
315	TCFL2(HMG)/K562-TCF7L2-ChIP-Seq(GSE29196)/Homer/ACWTCAAAGG	1	1
316	TEAD2(TEA)/Py2T-Tead2-ChIP-Seq(GSE55709)/Homer/CCWGGAATGY	1	1
317	TEAD4(TEA)/Tropoblast-Tead4-ChIP-Seq(GSE37350)/Homer/CCWGGAATGY	1	1
318	TEAD(TEA)/Fibroblast-PU.1-ChIP-Seq(Unpublished)/Homer/YCWGGAATGY	1	1
319	TFE3(bHLH)/MEF-TFE3-ChIP-Seq(GSE75757)/Homer/GTCACGTGACYV	1	1
320	Tgif1(Homeobox)/mES-Tgif1-ChIP-Seq(GSE55404)/Homer/YTGWCADY	1	1
321	Tgif2(Homeobox)/mES-Tgif2-ChIP-Seq(GSE55404)/Homer/TGTCANYT	1	1
322	THRa(NR)/C17.2-THRa-ChIP-Seq(GSE38347)/Homer/GGTCANYTGAGGWCA	1	1
323	THRb(NR)/Liver-NR1A2-ChIP-Seq(GSE52613)/Homer/TRAGGTCA	1	1
324	Tlx?(NR)/NPC-H3K4me1-ChIP-Seq(GSE16256)/Homer/CTGGCAGSCTGCCA	1	1
325	TR4(NR),DR1/Hela-TR4-ChIP-Seq(GSE24685)/Homer/GAGGTCAAAGGTCA	1	1
326	Twist(bHLH)/HMLE-TWIST1-ChIP-Seq(Chang_et_al)/Homer/VCAKCTGGNNNCCAGMTGBN	1	1
327	Unknown-ESC-element(?)/mES-Nanog-ChIP-Seq(GSE11724)/Homer/CACAGCAGGGGG	1	1
328	Unknown(Homeobox)/Limb-p300-ChIP-Seq/Homer/SSCMATWAAA	1	1
329	USF1(bHLH)/GM12878-Usf1-ChIP-Seq(GSE32465)/Homer/SGTCACGTGR	1	1
330	Usf2(bHLH)/C2C12-Usf2-ChIP-Seq(GSE36030)/Homer/GTCACGTGGT	1	1
331	VDR(NR),DR3/GM10855-VDR+vitD-ChIP-Seq(GSE22484)/Homer/ARAGGTCANWGAGTTCANNN	1	1
332	X-box(HTH)/NPC-H3K4me1-ChIP-Seq(GSE16256)/Homer/GGTTGCCATGGCAA	1	1
333	YY1(Zf)/Promoter/Homer/CAAGATGGCGGC	1	1
334	ZBTB12(Zf)/HEK293-ZBTB12.GFP-ChIP-Seq(GSE58341)/Homer/NGNTCTAGAACCNGV	1	1
335	ZBTB18(Zf)/HEK293-ZBTB18.GFP-ChIP-Seq(GSE58341)/Homer/AACATCTGGA	1	1
336	ZBTB33(Zf)/GM12878-ZBTB33-ChIP-Seq(GSE32465)/Homer/GGVTCTCGCGAGAAC	1	1
337	ZEB1(Zf)/PDAC-ZEB1-ChIP-Seq(GSE64557)/Homer/VCAGGTRDRY	1	1
338	Zfp281(Zf)/ES-Zfp281-ChIP-Seq(GSE81042)/Homer/CCCCTCCCCCAC	1	1
339	ZFP3(Zf)/HEK293-ZFP3.GFP-ChIP-Seq(GSE58341)/Homer/GGGTTTTGAAGGATGARTAGGAGTT	1	1
340	Zfp809(Zf)/ES-Zfp809-ChIP-Seq(GSE70799)/Homer/GGGGCTYGKCTGGGA	1	1
341	ZFX(Zf)/mES-Zfx-ChIP-Seq(GSE11431)/Homer/AGGCCTRG	1	1
342	Zic3(Zf)/mES-Zic3-ChIP-Seq(GSE37889)/Homer/GGCCYCCTGCTGDGH	1	1
343	Zic(Zf)/Cerebellum-ZIC1.2-ChIP-Seq(GSE60731)/Homer/CCTGCTGAGH	1	1
344	ZNF136(Zf)/HEK293-ZNF136.GFP-ChIP-Seq(GSE58341)/Homer/YTKGATAHAGTATTCTWGGTNGGCA	1	1
345	ZNF143|STAF(Zf)/CUTLL-ZNF143-ChIP-Seq(GSE29600)/Homer/ATTTCCCAGVAKSCY	1	1
346	ZNF165(Zf)/WHIM12-ZNF165-ChIP-Seq(GSE65937)/Homer/AAGGKGRCGCAGGCA	1	1
347	ZNF16(Zf)/HEK293-ZNF16.GFP-ChIP-Seq(GSE58341)/Homer/MACCTTCYATGGCTCCCTAKTGCCY	1	1
348	ZNF189(Zf)/HEK293-ZNF189.GFP-ChIP-Seq(GSE58341)/Homer/TGGAACAGMA	1	1
349	Znf263(Zf)/K562-Znf263-ChIP-Seq(GSE31477)/Homer/CVGTSCTCCC	1	1
350	ZNF264(Zf)/HEK293-ZNF264.GFP-ChIP-Seq(GSE58341)/Homer/RGGGCACTAACY	1	1
351	ZNF317(Zf)/HEK293-ZNF317.GFP-ChIP-Seq(GSE58341)/Homer/GTCWGCTGTYYCTCT	1	1
352	ZNF322(Zf)/HEK293-ZNF322.GFP-ChIP-Seq(GSE58341)/Homer/GAGCCTGGTACTGWGCCTGR	1	1
353	ZNF382(Zf)/HEK293-ZNF382.GFP-ChIP-Seq(GSE58341)/Homer/GNCTGTASTRNTGBCTCHTT	1	1
354	ZNF415(Zf)/HEK293-ZNF415.GFP-ChIP-Seq(GSE58341)/Homer/GRTGMTRGAGCC	1	1
355	ZNF416(Zf)/HEK293-ZNF416.GFP-ChIP-Seq(GSE58341)/Homer/WDNCTGGGCA	1	1
356	ZNF41(Zf)/HEK293-ZNF41.GFP-ChIP-Seq(GSE58341)/Homer/CCTCATGGTGYCYTWYTCCCTTGTG	1	1
357	ZNF467(Zf)/HEK293-ZNF467.GFP-ChIP-Seq(GSE58341)/Homer/TGGGGAAGGGCM	1	1
358	ZNF519(Zf)/HEK293-ZNF519.GFP-ChIP-Seq(GSE58341)/Homer/GAGSCCGAGC	1	1
359	ZNF528(Zf)/HEK293-ZNF528.GFP-ChIP-Seq(GSE58341)/Homer/AGAAATGACTTCCCT	1	1
360	ZNF669(Zf)/HEK293-ZNF669.GFP-ChIP-Seq(GSE58341)/Homer/GARTGGTCATCGCCC	1	1
361	ZNF675(Zf)/HEK293-ZNF675.GFP-ChIP-Seq(GSE58341)/Homer/ARGAGGMCAAAATGW	1	1
362	ZNF692(Zf)/HEK293-ZNF692.GFP-ChIP-Seq(GSE58341)/Homer/GTGGGCCCCA	1	1
363	ZNF711(Zf)/SHSY5Y-ZNF711-ChIP-Seq(GSE20673)/Homer/AGGCCTAG	1	1
364	ZSCAN22(Zf)/HEK293-ZSCAN22.GFP-ChIP-Seq(GSE58341)/Homer/SMCAGTCWGAKGGAGGAGGC	1	1

## Sheet: 3y2_overlap_Motif
universe		A	B
1	AP-1(bZIP)/ThioMac-PU.1-ChIP-Seq(GSE21512)/Homer/VTGACTCATC	1	1
20	CRE(bZIP)/Promoter/Homer/CSGTGACGTCAC	1	1
23	E2F3(E2F)/MEF-E2F3-ChIP-Seq(GSE71376)/Homer/BTKGGCGGGAAA	1	1
28	Egr1(Zf)/K562-Egr1-ChIP-Seq(GSE32465)/Homer/TGCGTGGGYG	1	1
29	Egr2(Zf)/Thymocytes-Egr2-ChIP-Seq(GSE34254)/Homer/NGCGTGGGCGGR	1	1
30	EHF(ETS)/LoVo-EHF-ChIP-Seq(GSE49402)/Homer/AVCAGGAAGT	1	1
31	EKLF(Zf)/Erythrocyte-Klf1-ChIP-Seq(GSE20478)/Homer/NWGGGTGTGGCY	1	1
32	ELF1(ETS)/Jurkat-ELF1-ChIP-Seq(SRA014231)/Homer/AVCCGGAAGT	1	1
33	ELF3(ETS)/PDAC-ELF3-ChIP-Seq(GSE64557)/Homer/ANCAGGAAGT	1	1
34	ELF5(ETS)/T47D-ELF5-ChIP-Seq(GSE30407)/Homer/ACVAGGAAGT	1	1
35	Elk1(ETS)/Hela-Elk1-ChIP-Seq(GSE31477)/Homer/HACTTCCGGY	1	1
36	Elk4(ETS)/Hela-Elk4-ChIP-Seq(GSE31477)/Homer/NRYTTCCGGY	1	1
37	ERG(ETS)/VCaP-ERG-ChIP-Seq(GSE14097)/Homer/ACAGGAAGTG	1	1
38	Ets1-distal(ETS)/CD4+-PolII-ChIP-Seq(Barski_et_al.)/Homer/MACAGGAAGT	1	1
39	ETS1(ETS)/Jurkat-ETS1-ChIP-Seq(GSE17954)/Homer/ACAGGAAGTG	1	1
41	ETS(ETS)/Promoter/Homer/AACCGGAAGT	1	1
42	ETS:RUNX(ETS,Runt)/Jurkat-RUNX1-ChIP-Seq(GSE17954)/Homer/RCAGGATGTGGT	1	1
43	ETV1(ETS)/GIST48-ETV1-ChIP-Seq(GSE22441)/Homer/AACCGGAAGT	1	1
44	Etv2(ETS)/ES-ER71-ChIP-Seq(GSE59402)/Homer(0.967)/NNAYTTCCTGHN	1	1
45	EWS:ERG-fusion(ETS)/CADO_ES1-EWS:ERG-ChIP-Seq(SRA014231)/Homer/ATTTCCTGTN	1	1
47	Fli1(ETS)/CD8-FLI-ChIP-Seq(GSE20898)/Homer/NRYTTCCGGH	1	1
50	Fra2(bZIP)/Striatum-Fra2-ChIP-Seq(GSE43429)/Homer/GGATGACTCATC	1	1
51	GABPA(ETS)/Jurkat-GABPa-ChIP-Seq(GSE17954)/Homer/RACCGGAAGT	1	1
66	Jun-AP1(bZIP)/K562-cJun-ChIP-Seq(GSE31477)/Homer/GATGASTCATCN	1	1
69	KLF10(Zf)/HEK293-KLF10.GFP-ChIP-Seq(GSE58341)/Homer/GGGGGTGTGTCC	1	1
70	KLF14(Zf)/HEK293-KLF14.GFP-ChIP-Seq(GSE58341)/Homer/RGKGGGCGKGGC	1	1
71	KLF3(Zf)/MEF-Klf3-ChIP-Seq(GSE44748)/Homer/NRGCCCCRCCCHBNN	1	1
72	Klf4(Zf)/mES-Klf4-ChIP-Seq(GSE11431)/Homer/GCCACACCCA	1	1
73	KLF5(Zf)/LoVo-KLF5-ChIP-Seq(GSE49402)/Homer/DGGGYGKGGC	1	1
74	KLF6(Zf)/PDAC-KLF6-ChIP-Seq(GSE64557)/Homer/MKGGGYGTGGCC	1	1
75	Klf9(Zf)/GBM-Klf9-ChIP-Seq(GSE62211)/Homer/GCCACRCCCACY	1	1
77	MafA(bZIP)/Islet-MafA-ChIP-Seq(GSE30298)/Homer/TGCTGACTCA	1	1
81	Maz(Zf)/HepG2-Maz-ChIP-Seq(GSE31477)/Homer/GGGGGGGG	1	1
87	NFY(CCAAT)/Promoter/Homer/RGCCAATSRG	1	1
89	NRF1(NRF)/MCF7-NRF1-ChIP-Seq(Unpublished)/Homer/CTGCGCATGCGC	1	1
91	NRF(NRF)/Promoter/Homer/STGCGCATGCGC	1	1
92	PBX1(Homeobox)/MCF7-PBX1-ChIP-Seq(GSE28007)/Homer/GSCTGTCACTCA	1	1
93	Pbx3(Homeobox)/GM12878-PBX3-ChIP-Seq(GSE32465)/Homer/SCTGTCAMTCAN	1	1
94	Pknox1(Homeobox)/ES-Prep1-ChIP-Seq(GSE63282)/Homer/SCTGTCAVTCAV	1	1
95	PU.1(ETS)/ThioMac-PU.1-ChIP-Seq(GSE21512)/Homer/AGAGGAAGTG	1	1
104	Ronin(THAP)/ES-Thap11-ChIP-Seq(GSE51522)/Homer/RACTACAACTCCCAGVAKGC	1	1
105	RUNX1(Runt)/Jurkat-RUNX1-ChIP-Seq(GSE29180)/Homer/AAACCACARM	1	1
106	RUNX2(Runt)/PCa-RUNX2-ChIP-Seq(GSE33889)/Homer/NWAACCACADNN	1	1
107	RUNX-AML(Runt)/CD4+-PolII-ChIP-Seq(Barski_et_al.)/Homer/GCTGTGGTTW	1	1
108	RUNX(Runt)/HPC7-Runx1-ChIP-Seq(GSE22178)/Homer/SAAACCACAG	1	1
110	Sp1(Zf)/Promoter/Homer/GGCCCCGCCCCC	1	1
111	Sp5(Zf)/mES-Sp5.Flag-ChIP-Seq(GSE72989)/Homer/RGKGGGCGGAGC	1	1
113	SpiB(ETS)/OCILY3-SPIB-ChIP-Seq(GSE56857)/Homer/AAAGRGGAAGTG	1	1
114	STAT1(Stat)/HelaS3-STAT1-ChIP-Seq(GSE12782)/Homer/NATTTCCNGGAAAT	1	1
115	Stat3+il21(Stat)/CD4-Stat3-ChIP-Seq(GSE19198)/Homer/SVYTTCCNGGAARB	1	1
122	YY1(Zf)/Promoter/Homer/CAAGATGGCGGC	1	1
123	ZBTB33(Zf)/GM12878-ZBTB33-ChIP-Seq(GSE32465)/Homer/GGVTCTCGCGAGAAC	1	1
98	RAR:RXR(NR),DR5/ES-RAR-ChIP-Seq(GSE56893)/Homer/RGGTCADNNAGAGGTCAV	0	1
126	ZNF264(Zf)/HEK293-ZNF264.GFP-ChIP-Seq(GSE58341)/Homer/RGGGCACTAACY	0	1
128	ZNF675(Zf)/HEK293-ZNF675.GFP-ChIP-Seq(GSE58341)/Homer/ARGAGGMCAAAATGW	0	1
2	Atf1(bZIP)/K562-ATF1-ChIP-Seq(GSE31477)/Homer/GATGACGTCA	1	0
3	Atf2(bZIP)/3T3L1-Atf2-ChIP-Seq(GSE56872)/Homer/NRRTGACGTCAT	1	0
4	Atf3(bZIP)/GBM-ATF3-ChIP-Seq(GSE33912)/Homer/DATGASTCATHN	1	0
5	Atf7(bZIP)/3T3L1-Atf7-ChIP-Seq(GSE56872)/Homer/NGRTGACGTCAY	1	0
6	Bach1(bZIP)/K562-Bach1-ChIP-Seq(GSE31477)/Homer/AWWNTGCTGAGTCAT	1	0
7	Bach2(bZIP)/OCILy7-Bach2-ChIP-Seq(GSE44420)/Homer/TGCTGAGTCA	1	0
8	BATF(bZIP)/Th17-BATF-ChIP-Seq(GSE39756)/Homer/DATGASTCAT	1	0
9	bHLHE40(bHLH)/HepG2-BHLHE40-ChIP-Seq(GSE31477)/Homer/KCACGTGMCN	1	0
10	BMAL1(bHLH)/Liver-Bmal1-ChIP-Seq(GSE39860)/Homer/GNCACGTG	1	0
11	BMYB(HTH)/Hela-BMYB-ChIP-Seq(GSE27030)/Homer/NHAACBGYYV	1	0
12	BORIS(Zf)/K562-CTCFL-ChIP-Seq(GSE32465)/Homer/CNNBRGCGCCCCCTGSTGGC	1	0
13	CArG(MADS)/PUER-Srf-ChIP-Seq(Sullivan_et_al.)/Homer/CCATATATGGNM	1	0
14	CEBP:AP1(bZIP)/ThioMac-CEBPb-ChIP-Seq(GSE21512)/Homer/DRTGTTGCAA	1	0
15	CEBP(bZIP)/ThioMac-CEBPb-ChIP-Seq(GSE21512)/Homer/ATTGCGCAAC	1	0
16	c-Jun-CRE(bZIP)/K562-cJun-ChIP-Seq(GSE31477)/Homer/ATGACGTCATCY	1	0
17	CLOCK(bHLH)/Liver-Clock-ChIP-Seq(GSE39860)/Homer/GHCACGTG	1	0
18	c-Myc(bHLH)/LNCAP-cMyc-ChIP-Seq(Unpublished)/Homer/VCCACGTG	1	0
19	c-Myc(bHLH)/mES-cMyc-ChIP-Seq(GSE11431)/Homer/VVCCACGTGG	1	0
21	CTCF(Zf)/CD4+-CTCF-ChIP-Seq(Barski_et_al.)/Homer/AYAGTGCCMYCTRGTGGCCA	1	0
22	E2F1(E2F)/Hela-E2F1-ChIP-Seq(GSE22478)/Homer/CWGGCGGGAA	1	0
24	E2F4(E2F)/K562-E2F4-ChIP-Seq(GSE31477)/Homer/GGCGGGAAAH	1	0
25	E2F6(E2F)/Hela-E2F6-ChIP-Seq(GSE31477)/Homer/GGCGGGAARN	1	0
26	E2F7(E2F)/Hela-E2F7-ChIP-Seq(GSE32673)/Homer/VDTTTCCCGCCA	1	0
27	E-box(bHLH)/Promoter/Homer/SSGGTCACGTGA	1	0
40	ETS:E-box(ETS,bHLH)/HPC7-Scl-ChIP-Seq(GSE22178)/Homer/AGGAARCAGCTG	1	0
46	EWS:FLI1-fusion(ETS)/SK_N_MC-EWS:FLI1-ChIP-Seq(SRA014231)/Homer/VACAGGAAAT	1	0
48	Fosl2(bZIP)/3T3L1-Fosl2-ChIP-Seq(GSE56872)/Homer/NATGASTCABNN	1	0
49	Fra1(bZIP)/BT549-Fra1-ChIP-Seq(GSE46166)/Homer/NNATGASTCATH	1	0
52	Gata1(Zf)/K562-GATA1-ChIP-Seq(GSE18829)/Homer/SAGATAAGRV	1	0
53	Gata2(Zf)/K562-GATA2-ChIP-Seq(GSE18829)/Homer/BBCTTATCTS	1	0
54	GATA3(Zf)/iTreg-Gata3-ChIP-Seq(GSE20898)/Homer/AGATAASR	1	0
55	Gata4(Zf)/Heart-Gata4-ChIP-Seq(GSE35151)/Homer/NBWGATAAGR	1	0
56	Gata6(Zf)/HUG1N-GATA6-ChIP-Seq(GSE51936)/Homer/YCTTATCTBN	1	0
57	GATA:SCL(Zf,bHLH)/Ter119-SCL-ChIP-Seq(GSE18720)/Homer/CRGCTGBNGNSNNSAGATAA	1	0
58	Gfi1b(Zf)/HPC7-Gfi1b-ChIP-Seq(GSE22178)/Homer/MAATCACTGC	1	0
59	GFX(?)/Promoter/Homer/ATTCTCGCGAGA	1	0
60	GFY(?)/Promoter/Homer/ACTACAATTCCC	1	0
61	GFY-Staf(?,Zf)/Promoter/Homer/RACTACAATTCCCAGAAKGC	1	0
62	HLF(bZIP)/HSC-HLF.Flag-ChIP-Seq(GSE69817)/Homer/RTTATGYAAB	1	0
63	IRF2(IRF)/Erythroblas-IRF2-ChIP-Seq(GSE36985)/Homer/GAAASYGAAASY	1	0
64	IRF4(IRF)/GM12878-IRF4-ChIP-Seq(GSE32465)/Homer/ACTGAAACCA	1	0
65	IRF8(IRF)/BMDM-IRF8-ChIP-Seq(GSE77884)/Homer/GRAASTGAAAST	1	0
67	JunB(bZIP)/DendriticCells-Junb-ChIP-Seq(GSE36099)/Homer/RATGASTCAT	1	0
68	JunD(bZIP)/K562-JunD-ChIP-Seq/Homer/ATGACGTCATCN	1	0
76	Lhx3(Homeobox)/Neuron-Lhx3-ChIP-Seq(GSE31456)/Homer/ADBTAATTAR	1	0
78	MafB(bZIP)/BMM-Mafb-ChIP-Seq(GSE75722)/Homer/WNTGCTGASTCAGCANWTTY	1	0
79	MafK(bZIP)/C2C12-MafK-ChIP-Seq(GSE36030)/Homer/GCTGASTCAGCA	1	0
80	Max(bHLH)/K562-Max-ChIP-Seq(GSE31477)/Homer/RCCACGTGGYYN	1	0
82	MITF(bHLH)/MastCells-MITF-ChIP-Seq(GSE48085)/Homer/RTCATGTGAC	1	0
83	MYB(HTH)/ERMYB-Myb-ChIPSeq(GSE22095)/Homer/GGCVGTTR	1	0
84	Nanog(Homeobox)/mES-Nanog-ChIP-Seq(GSE11724)/Homer/RGCCATTAAC	1	0
85	NF1(CTF)/LNCAP-NF1-ChIP-Seq(Unpublished)/Homer/CYTGGCABNSTGCCAR	1	0
86	NF-E2(bZIP)/K562-NFE2-ChIP-Seq(GSE31477)/Homer/GATGACTCAGCA	1	0
88	n-Myc(bHLH)/mES-nMyc-ChIP-Seq(GSE11431)/Homer/VRCCACGTGG	1	0
90	Nrf2(bZIP)/Lymphoblast-Nrf2-ChIP-Seq(GSE37589)/Homer/HTGCTGAGTCAT	1	0
96	PU.1:IRF8(ETS:IRF)/pDC-Irf8-ChIP-Seq(GSE66899)/Homer/GGAAGTGAAAST	1	0
97	PU.1-IRF(ETS:IRF)/Bcell-PU.1-ChIP-Seq(GSE21512)/Homer/MGGAAGTGAAAC	1	0
99	Reverb(NR),DR2/RAW-Reverba.biotin-ChIP-Seq(GSE45914)/Homer/GTRGGTCASTGGGTCA	1	0
100	Rfx1(HTH)/NPC-H3K4me1-ChIP-Seq(GSE16256)/Homer/KGTTGCCATGGCAA	1	0
101	Rfx2(HTH)/LoVo-RFX2-ChIP-Seq(GSE49402)/Homer/GTTGCCATGGCAACM	1	0
102	Rfx6(HTH)/Min6b1-Rfx6.HA-ChIP-Seq(GSE62844)/Homer/TGTTKCCTAGCAACM	1	0
103	RFX(HTH)/K562-RFX3-ChIP-Seq(SRA012198)/Homer/CGGTTGCCATGGCAAC	1	0
109	Smad3(MAD)/NPC-Smad3-ChIP-Seq(GSE36673)/Homer/TWGTCTGV	1	0
112	SPDEF(ETS)/VCaP-SPDEF-ChIP-Seq(SRA014231)/Homer/ASWTCCTGBT	1	0
116	Stat3(Stat)/mES-Stat3-ChIP-Seq(GSE11431)/Homer/CTTCCGGGAA	1	0
117	STAT4(Stat)/CD4-Stat4-ChIP-Seq(GSE22104)/Homer/NYTTCCWGGAAR	1	0
118	TFE3(bHLH)/MEF-TFE3-ChIP-Seq(GSE75757)/Homer/GTCACGTGACYV	1	0
119	USF1(bHLH)/GM12878-Usf1-ChIP-Seq(GSE32465)/Homer/SGTCACGTGR	1	0
120	Usf2(bHLH)/C2C12-Usf2-ChIP-Seq(GSE36030)/Homer/GTCACGTGGT	1	0
121	X-box(HTH)/NPC-H3K4me1-ChIP-Seq(GSE16256)/Homer/GGTTGCCATGGCAA	1	0
124	Zfp281(Zf)/ES-Zfp281-ChIP-Seq(GSE81042)/Homer/CCCCTCCCCCAC	1	0
125	ZNF143|STAF(Zf)/CUTLL-ZNF143-ChIP-Seq(GSE29600)/Homer/ATTTCCCAGVAKSCY	1	0
127	ZNF467(Zf)/HEK293-ZNF467.GFP-ChIP-Seq(GSE58341)/Homer/TGGGGAAGGGCM	1	0

## Sheet: 3y3_overlap_Motif
universe		A	B
1	AMYB(HTH)/Testes-AMYB-ChIP-Seq(GSE44588)/Homer/TGGCAGTTGG	0	1
2	AP-1(bZIP)/ThioMac-PU.1-ChIP-Seq(GSE21512)/Homer/VTGACTCATC	1	1
3	Arnt:Ahr(bHLH)/MCF7-Arnt-ChIP-Seq(Lo_et_al.)/Homer/TBGCACGCAA	1	0
4	Atf1(bZIP)/K562-ATF1-ChIP-Seq(GSE31477)/Homer/GATGACGTCA	0	1
5	Atf2(bZIP)/3T3L1-Atf2-ChIP-Seq(GSE56872)/Homer/NRRTGACGTCAT	1	1
6	Atf3(bZIP)/GBM-ATF3-ChIP-Seq(GSE33912)/Homer/DATGASTCATHN	1	1
7	Atf4(bZIP)/MEF-Atf4-ChIP-Seq(GSE35681)/Homer/MTGATGCAAT	0	1
8	Atf7(bZIP)/3T3L1-Atf7-ChIP-Seq(GSE56872)/Homer/NGRTGACGTCAY	1	1
9	Bach1(bZIP)/K562-Bach1-ChIP-Seq(GSE31477)/Homer/AWWNTGCTGAGTCAT	0	1
10	Bach2(bZIP)/OCILy7-Bach2-ChIP-Seq(GSE44420)/Homer/TGCTGAGTCA	0	1
11	BATF(bZIP)/Th17-BATF-ChIP-Seq(GSE39756)/Homer/DATGASTCAT	0	1
12	bHLHE40(bHLH)/HepG2-BHLHE40-ChIP-Seq(GSE31477)/Homer/KCACGTGMCN	1	1
13	BMYB(HTH)/Hela-BMYB-ChIP-Seq(GSE27030)/Homer/NHAACBGYYV	0	1
14	BORIS(Zf)/K562-CTCFL-ChIP-Seq(GSE32465)/Homer/CNNBRGCGCCCCCTGSTGGC	0	1
15	CArG(MADS)/PUER-Srf-ChIP-Seq(Sullivan_et_al.)/Homer/CCATATATGGNM	0	1
16	CEBP:AP1(bZIP)/ThioMac-CEBPb-ChIP-Seq(GSE21512)/Homer/DRTGTTGCAA	0	1
17	CEBP(bZIP)/ThioMac-CEBPb-ChIP-Seq(GSE21512)/Homer/ATTGCGCAAC	0	1
18	Chop(bZIP)/MEF-Chop-ChIP-Seq(GSE35681)/Homer/ATTGCATCAT	0	1
19	c-Jun-CRE(bZIP)/K562-cJun-ChIP-Seq(GSE31477)/Homer/ATGACGTCATCY	0	1
20	CLOCK(bHLH)/Liver-Clock-ChIP-Seq(GSE39860)/Homer/GHCACGTG	0	1
21	c-Myc(bHLH)/LNCAP-cMyc-ChIP-Seq(Unpublished)/Homer/VCCACGTG	0	1
22	CRE(bZIP)/Promoter/Homer/CSGTGACGTCAC	1	1
23	CTCF(Zf)/CD4+-CTCF-ChIP-Seq(Barski_et_al.)/Homer/AYAGTGCCMYCTRGTGGCCA	0	1
24	E2F1(E2F)/Hela-E2F1-ChIP-Seq(GSE22478)/Homer/CWGGCGGGAA	0	1
25	E2F3(E2F)/MEF-E2F3-ChIP-Seq(GSE71376)/Homer/BTKGGCGGGAAA	1	1
26	E2F4(E2F)/K562-E2F4-ChIP-Seq(GSE31477)/Homer/GGCGGGAAAH	0	1
27	E2F6(E2F)/Hela-E2F6-ChIP-Seq(GSE31477)/Homer/GGCGGGAARN	0	1
28	E2F7(E2F)/Hela-E2F7-ChIP-Seq(GSE32673)/Homer/VDTTTCCCGCCA	0	1
29	E-box(bHLH)/Promoter/Homer/SSGGTCACGTGA	1	1
30	Egr1(Zf)/K562-Egr1-ChIP-Seq(GSE32465)/Homer/TGCGTGGGYG	1	1
31	Egr2(Zf)/Thymocytes-Egr2-ChIP-Seq(GSE34254)/Homer/NGCGTGGGCGGR	1	1
32	EHF(ETS)/LoVo-EHF-ChIP-Seq(GSE49402)/Homer/AVCAGGAAGT	1	1
33	EKLF(Zf)/Erythrocyte-Klf1-ChIP-Seq(GSE20478)/Homer/NWGGGTGTGGCY	1	1
34	ELF1(ETS)/Jurkat-ELF1-ChIP-Seq(SRA014231)/Homer/AVCCGGAAGT	1	1
35	ELF3(ETS)/PDAC-ELF3-ChIP-Seq(GSE64557)/Homer/ANCAGGAAGT	1	1
36	ELF5(ETS)/T47D-ELF5-ChIP-Seq(GSE30407)/Homer/ACVAGGAAGT	1	1
37	Elk1(ETS)/Hela-Elk1-ChIP-Seq(GSE31477)/Homer/HACTTCCGGY	1	1
38	Elk4(ETS)/Hela-Elk4-ChIP-Seq(GSE31477)/Homer/NRYTTCCGGY	1	1
39	ERG(ETS)/VCaP-ERG-ChIP-Seq(GSE14097)/Homer/ACAGGAAGTG	1	1
40	Ets1-distal(ETS)/CD4+-PolII-ChIP-Seq(Barski_et_al.)/Homer/MACAGGAAGT	1	1
41	ETS1(ETS)/Jurkat-ETS1-ChIP-Seq(GSE17954)/Homer/ACAGGAAGTG	1	1
42	ETS:E-box(ETS,bHLH)/HPC7-Scl-ChIP-Seq(GSE22178)/Homer/AGGAARCAGCTG	0	1
43	ETS(ETS)/Promoter/Homer/AACCGGAAGT	1	1
44	ETS:RUNX(ETS,Runt)/Jurkat-RUNX1-ChIP-Seq(GSE17954)/Homer/RCAGGATGTGGT	1	1
45	ETV1(ETS)/GIST48-ETV1-ChIP-Seq(GSE22441)/Homer/AACCGGAAGT	1	1
46	Etv2(ETS)/ES-ER71-ChIP-Seq(GSE59402)/Homer(0.967)/NNAYTTCCTGHN	1	1
47	EWS:ERG-fusion(ETS)/CADO_ES1-EWS:ERG-ChIP-Seq(SRA014231)/Homer/ATTTCCTGTN	1	1
48	EWS:FLI1-fusion(ETS)/SK_N_MC-EWS:FLI1-ChIP-Seq(SRA014231)/Homer/VACAGGAAAT	1	1
49	Fli1(ETS)/CD8-FLI-ChIP-Seq(GSE20898)/Homer/NRYTTCCGGH	1	1
50	Fosl2(bZIP)/3T3L1-Fosl2-ChIP-Seq(GSE56872)/Homer/NATGASTCABNN	0	1
51	Fra1(bZIP)/BT549-Fra1-ChIP-Seq(GSE46166)/Homer/NNATGASTCATH	0	1
52	Fra2(bZIP)/Striatum-Fra2-ChIP-Seq(GSE43429)/Homer/GGATGACTCATC	1	1
53	GABPA(ETS)/Jurkat-GABPa-ChIP-Seq(GSE17954)/Homer/RACCGGAAGT	1	1
54	Gata1(Zf)/K562-GATA1-ChIP-Seq(GSE18829)/Homer/SAGATAAGRV	1	1
55	Gata2(Zf)/K562-GATA2-ChIP-Seq(GSE18829)/Homer/BBCTTATCTS	1	0
56	GATA:SCL(Zf,bHLH)/Ter119-SCL-ChIP-Seq(GSE18720)/Homer/CRGCTGBNGNSNNSAGATAA	0	1
57	Gfi1b(Zf)/HPC7-Gfi1b-ChIP-Seq(GSE22178)/Homer/MAATCACTGC	0	1
58	GFX(?)/Promoter/Homer/ATTCTCGCGAGA	0	1
59	GFY(?)/Promoter/Homer/ACTACAATTCCC	1	1
60	GFY-Staf(?,Zf)/Promoter/Homer/RACTACAATTCCCAGAAKGC	1	1
61	HIF-1a(bHLH)/MCF7-HIF1a-ChIP-Seq(GSE28352)/Homer/TACGTGCV	0	1
62	HIF2a(bHLH)/785_O-HIF2a-ChIP-Seq(GSE34871)/Homer/GCACGTACCC	0	1
63	IRF1(IRF)/PBMC-IRF1-ChIP-Seq(GSE43036)/Homer/GAAAGTGAAAGT	0	1
64	IRF8(IRF)/BMDM-IRF8-ChIP-Seq(GSE77884)/Homer/GRAASTGAAAST	0	1
65	Jun-AP1(bZIP)/K562-cJun-ChIP-Seq(GSE31477)/Homer/GATGASTCATCN	0	1
66	JunB(bZIP)/DendriticCells-Junb-ChIP-Seq(GSE36099)/Homer/RATGASTCAT	1	1
67	JunD(bZIP)/K562-JunD-ChIP-Seq/Homer/ATGACGTCATCN	1	1
68	KLF10(Zf)/HEK293-KLF10.GFP-ChIP-Seq(GSE58341)/Homer/GGGGGTGTGTCC	1	1
69	KLF14(Zf)/HEK293-KLF14.GFP-ChIP-Seq(GSE58341)/Homer/RGKGGGCGKGGC	1	1
70	KLF3(Zf)/MEF-Klf3-ChIP-Seq(GSE44748)/Homer/NRGCCCCRCCCHBNN	1	1
71	Klf4(Zf)/mES-Klf4-ChIP-Seq(GSE11431)/Homer/GCCACACCCA	1	1
72	KLF5(Zf)/LoVo-KLF5-ChIP-Seq(GSE49402)/Homer/DGGGYGKGGC	1	1
73	KLF6(Zf)/PDAC-KLF6-ChIP-Seq(GSE64557)/Homer/MKGGGYGTGGCC	1	1
74	Klf9(Zf)/GBM-Klf9-ChIP-Seq(GSE62211)/Homer/GCCACRCCCACY	1	1
75	MafA(bZIP)/Islet-MafA-ChIP-Seq(GSE30298)/Homer/TGCTGACTCA	0	1
76	MafK(bZIP)/C2C12-MafK-ChIP-Seq(GSE36030)/Homer/GCTGASTCAGCA	1	1
77	Max(bHLH)/K562-Max-ChIP-Seq(GSE31477)/Homer/RCCACGTGGYYN	0	1
78	Maz(Zf)/HepG2-Maz-ChIP-Seq(GSE31477)/Homer/GGGGGGGG	1	1
79	MITF(bHLH)/MastCells-MITF-ChIP-Seq(GSE48085)/Homer/RTCATGTGAC	0	1
80	MYB(HTH)/ERMYB-Myb-ChIPSeq(GSE22095)/Homer/GGCVGTTR	0	1
81	NF1(CTF)/LNCAP-NF1-ChIP-Seq(Unpublished)/Homer/CYTGGCABNSTGCCAR	0	1
82	NFAT:AP1(RHD,bZIP)/Jurkat-NFATC1-ChIP-Seq(Jolma_et_al.)/Homer/SARTGGAAAAWRTGAGTCAB	0	1
83	NF-E2(bZIP)/K562-NFE2-ChIP-Seq(GSE31477)/Homer/GATGACTCAGCA	1	1
84	NFY(CCAAT)/Promoter/Homer/RGCCAATSRG	1	1
85	n-Myc(bHLH)/mES-nMyc-ChIP-Seq(GSE11431)/Homer/VRCCACGTGG	0	1
86	NRF1(NRF)/MCF7-NRF1-ChIP-Seq(Unpublished)/Homer/CTGCGCATGCGC	1	1
87	Nrf2(bZIP)/Lymphoblast-Nrf2-ChIP-Seq(GSE37589)/Homer/HTGCTGAGTCAT	0	1
88	NRF(NRF)/Promoter/Homer/STGCGCATGCGC	1	1
89	PBX1(Homeobox)/MCF7-PBX1-ChIP-Seq(GSE28007)/Homer/GSCTGTCACTCA	1	1
90	Pbx3(Homeobox)/GM12878-PBX3-ChIP-Seq(GSE32465)/Homer/SCTGTCAMTCAN	1	1
91	Pknox1(Homeobox)/ES-Prep1-ChIP-Seq(GSE63282)/Homer/SCTGTCAVTCAV	0	1
92	PU.1(ETS)/ThioMac-PU.1-ChIP-Seq(GSE21512)/Homer/AGAGGAAGTG	1	1
93	PU.1:IRF8(ETS:IRF)/pDC-Irf8-ChIP-Seq(GSE66899)/Homer/GGAAGTGAAAST	0	1
94	PU.1-IRF(ETS:IRF)/Bcell-PU.1-ChIP-Seq(GSE21512)/Homer/MGGAAGTGAAAC	0	1
95	Rfx1(HTH)/NPC-H3K4me1-ChIP-Seq(GSE16256)/Homer/KGTTGCCATGGCAA	1	1
96	Rfx2(HTH)/LoVo-RFX2-ChIP-Seq(GSE49402)/Homer/GTTGCCATGGCAACM	0	1
97	Rfx5(HTH)/GM12878-Rfx5-ChIP-Seq(GSE31477)/Homer/SCCTAGCAACAG	0	1
98	Rfx6(HTH)/Min6b1-Rfx6.HA-ChIP-Seq(GSE62844)/Homer/TGTTKCCTAGCAACM	0	1
99	RFX(HTH)/K562-RFX3-ChIP-Seq(SRA012198)/Homer/CGGTTGCCATGGCAAC	0	1
100	Ronin(THAP)/ES-Thap11-ChIP-Seq(GSE51522)/Homer/RACTACAACTCCCAGVAKGC	1	1
101	RUNX1(Runt)/Jurkat-RUNX1-ChIP-Seq(GSE29180)/Homer/AAACCACARM	1	1
102	RUNX2(Runt)/PCa-RUNX2-ChIP-Seq(GSE33889)/Homer/NWAACCACADNN	1	1
103	RUNX-AML(Runt)/CD4+-PolII-ChIP-Seq(Barski_et_al.)/Homer/GCTGTGGTTW	1	1
104	RUNX(Runt)/HPC7-Runx1-ChIP-Seq(GSE22178)/Homer/SAAACCACAG	1	1
105	Smad3(MAD)/NPC-Smad3-ChIP-Seq(GSE36673)/Homer/TWGTCTGV	0	1
106	Smad4(MAD)/ESC-SMAD4-ChIP-Seq(GSE29422)/Homer/VBSYGTCTGG	0	1
107	Sp1(Zf)/Promoter/Homer/GGCCCCGCCCCC	1	1
108	Sp5(Zf)/mES-Sp5.Flag-ChIP-Seq(GSE72989)/Homer/RGKGGGCGGAGC	1	1
109	SPDEF(ETS)/VCaP-SPDEF-ChIP-Seq(SRA014231)/Homer/ASWTCCTGBT	0	1
110	SpiB(ETS)/OCILY3-SPIB-ChIP-Seq(GSE56857)/Homer/AAAGRGGAAGTG	1	1
111	STAT1(Stat)/HelaS3-STAT1-ChIP-Seq(GSE12782)/Homer/NATTTCCNGGAAAT	0	1
112	Stat3+il21(Stat)/CD4-Stat3-ChIP-Seq(GSE19198)/Homer/SVYTTCCNGGAARB	1	1
113	Stat3(Stat)/mES-Stat3-ChIP-Seq(GSE11431)/Homer/CTTCCGGGAA	0	1
114	STAT4(Stat)/CD4-Stat4-ChIP-Seq(GSE22104)/Homer/NYTTCCWGGAAR	0	1
115	T1ISRE(IRF)/ThioMac-Ifnb-Expression/Homer/ACTTTCGTTTCT	0	1
116	TFE3(bHLH)/MEF-TFE3-ChIP-Seq(GSE75757)/Homer/GTCACGTGACYV	0	1
117	Tlx?(NR)/NPC-H3K4me1-ChIP-Seq(GSE16256)/Homer/CTGGCAGSCTGCCA	0	1
118	Unknown-ESC-element(?)/mES-Nanog-ChIP-Seq(GSE11724)/Homer/CACAGCAGGGGG	0	1
119	USF1(bHLH)/GM12878-Usf1-ChIP-Seq(GSE32465)/Homer/SGTCACGTGR	1	1
120	Usf2(bHLH)/C2C12-Usf2-ChIP-Seq(GSE36030)/Homer/GTCACGTGGT	0	1
121	X-box(HTH)/NPC-H3K4me1-ChIP-Seq(GSE16256)/Homer/GGTTGCCATGGCAA	0	1
122	YY1(Zf)/Promoter/Homer/CAAGATGGCGGC	0	1
123	ZBTB33(Zf)/GM12878-ZBTB33-ChIP-Seq(GSE32465)/Homer/GGVTCTCGCGAGAAC	0	1
124	Zfp281(Zf)/ES-Zfp281-ChIP-Seq(GSE81042)/Homer/CCCCTCCCCCAC	0	1
125	ZNF143|STAF(Zf)/CUTLL-ZNF143-ChIP-Seq(GSE29600)/Homer/ATTTCCCAGVAKSCY	0	1
126	ZNF264(Zf)/HEK293-ZNF264.GFP-ChIP-Seq(GSE58341)/Homer/RGGGCACTAACY	0	1
127	ZNF467(Zf)/HEK293-ZNF467.GFP-ChIP-Seq(GSE58341)/Homer/TGGGGAAGGGCM	1	1
128	ZNF519(Zf)/HEK293-ZNF519.GFP-ChIP-Seq(GSE58341)/Homer/GAGSCCGAGC	0	1
129	ZNF711(Zf)/SHSY5Y-ZNF711-ChIP-Seq(GSE20673)/Homer/AGGCCTAG	0	1

## Sheet: 3y4_overlap_Motif
universe		A	B
1	AMYB(HTH)/Testes-AMYB-ChIP-Seq(GSE44588)/Homer/TGGCAGTTGG	1	1
2	AP-1(bZIP)/ThioMac-PU.1-ChIP-Seq(GSE21512)/Homer/VTGACTCATC	1	1
4	Atf1(bZIP)/K562-ATF1-ChIP-Seq(GSE31477)/Homer/GATGACGTCA	1	1
5	Atf2(bZIP)/3T3L1-Atf2-ChIP-Seq(GSE56872)/Homer/NRRTGACGTCAT	1	1
6	Atf3(bZIP)/GBM-ATF3-ChIP-Seq(GSE33912)/Homer/DATGASTCATHN	1	1
7	Atf4(bZIP)/MEF-Atf4-ChIP-Seq(GSE35681)/Homer/MTGATGCAAT	1	1
8	Atf7(bZIP)/3T3L1-Atf7-ChIP-Seq(GSE56872)/Homer/NGRTGACGTCAY	1	1
9	Bach1(bZIP)/K562-Bach1-ChIP-Seq(GSE31477)/Homer/AWWNTGCTGAGTCAT	1	1
10	Bach2(bZIP)/OCILy7-Bach2-ChIP-Seq(GSE44420)/Homer/TGCTGAGTCA	1	1
11	BATF(bZIP)/Th17-BATF-ChIP-Seq(GSE39756)/Homer/DATGASTCAT	1	1
12	bHLHE40(bHLH)/HepG2-BHLHE40-ChIP-Seq(GSE31477)/Homer/KCACGTGMCN	1	1
13	BMYB(HTH)/Hela-BMYB-ChIP-Seq(GSE27030)/Homer/NHAACBGYYV	1	1
14	BORIS(Zf)/K562-CTCFL-ChIP-Seq(GSE32465)/Homer/CNNBRGCGCCCCCTGSTGGC	1	1
17	CEBP(bZIP)/ThioMac-CEBPb-ChIP-Seq(GSE21512)/Homer/ATTGCGCAAC	1	1
19	c-Jun-CRE(bZIP)/K562-cJun-ChIP-Seq(GSE31477)/Homer/ATGACGTCATCY	1	1
20	CLOCK(bHLH)/Liver-Clock-ChIP-Seq(GSE39860)/Homer/GHCACGTG	1	1
21	c-Myc(bHLH)/LNCAP-cMyc-ChIP-Seq(Unpublished)/Homer/VCCACGTG	1	1
22	CRE(bZIP)/Promoter/Homer/CSGTGACGTCAC	1	1
23	CTCF(Zf)/CD4+-CTCF-ChIP-Seq(Barski_et_al.)/Homer/AYAGTGCCMYCTRGTGGCCA	1	1
24	E2F1(E2F)/Hela-E2F1-ChIP-Seq(GSE22478)/Homer/CWGGCGGGAA	1	1
25	E2F3(E2F)/MEF-E2F3-ChIP-Seq(GSE71376)/Homer/BTKGGCGGGAAA	1	1
26	E2F4(E2F)/K562-E2F4-ChIP-Seq(GSE31477)/Homer/GGCGGGAAAH	1	1
28	E2F7(E2F)/Hela-E2F7-ChIP-Seq(GSE32673)/Homer/VDTTTCCCGCCA	1	1
29	E-box(bHLH)/Promoter/Homer/SSGGTCACGTGA	1	1
30	Egr1(Zf)/K562-Egr1-ChIP-Seq(GSE32465)/Homer/TGCGTGGGYG	1	1
31	Egr2(Zf)/Thymocytes-Egr2-ChIP-Seq(GSE34254)/Homer/NGCGTGGGCGGR	1	1
32	EHF(ETS)/LoVo-EHF-ChIP-Seq(GSE49402)/Homer/AVCAGGAAGT	1	1
33	EKLF(Zf)/Erythrocyte-Klf1-ChIP-Seq(GSE20478)/Homer/NWGGGTGTGGCY	1	1
34	ELF1(ETS)/Jurkat-ELF1-ChIP-Seq(SRA014231)/Homer/AVCCGGAAGT	1	1
35	ELF3(ETS)/PDAC-ELF3-ChIP-Seq(GSE64557)/Homer/ANCAGGAAGT	1	1
36	ELF5(ETS)/T47D-ELF5-ChIP-Seq(GSE30407)/Homer/ACVAGGAAGT	1	1
37	Elk1(ETS)/Hela-Elk1-ChIP-Seq(GSE31477)/Homer/HACTTCCGGY	1	1
38	Elk4(ETS)/Hela-Elk4-ChIP-Seq(GSE31477)/Homer/NRYTTCCGGY	1	1
39	ERG(ETS)/VCaP-ERG-ChIP-Seq(GSE14097)/Homer/ACAGGAAGTG	1	1
40	Ets1-distal(ETS)/CD4+-PolII-ChIP-Seq(Barski_et_al.)/Homer/MACAGGAAGT	1	1
41	ETS1(ETS)/Jurkat-ETS1-ChIP-Seq(GSE17954)/Homer/ACAGGAAGTG	1	1
42	ETS:E-box(ETS,bHLH)/HPC7-Scl-ChIP-Seq(GSE22178)/Homer/AGGAARCAGCTG	1	1
43	ETS(ETS)/Promoter/Homer/AACCGGAAGT	1	1
44	ETS:RUNX(ETS,Runt)/Jurkat-RUNX1-ChIP-Seq(GSE17954)/Homer/RCAGGATGTGGT	1	1
45	ETV1(ETS)/GIST48-ETV1-ChIP-Seq(GSE22441)/Homer/AACCGGAAGT	1	1
46	Etv2(ETS)/ES-ER71-ChIP-Seq(GSE59402)/Homer(0.967)/NNAYTTCCTGHN	1	1
47	EWS:ERG-fusion(ETS)/CADO_ES1-EWS:ERG-ChIP-Seq(SRA014231)/Homer/ATTTCCTGTN	1	1
48	EWS:FLI1-fusion(ETS)/SK_N_MC-EWS:FLI1-ChIP-Seq(SRA014231)/Homer/VACAGGAAAT	1	1
49	Fli1(ETS)/CD8-FLI-ChIP-Seq(GSE20898)/Homer/NRYTTCCGGH	1	1
50	Fosl2(bZIP)/3T3L1-Fosl2-ChIP-Seq(GSE56872)/Homer/NATGASTCABNN	1	1
55	Fra1(bZIP)/BT549-Fra1-ChIP-Seq(GSE46166)/Homer/NNATGASTCATH	1	1
56	Fra2(bZIP)/Striatum-Fra2-ChIP-Seq(GSE43429)/Homer/GGATGACTCATC	1	1
57	GABPA(ETS)/Jurkat-GABPa-ChIP-Seq(GSE17954)/Homer/RACCGGAAGT	1	1
58	Gata1(Zf)/K562-GATA1-ChIP-Seq(GSE18829)/Homer/SAGATAAGRV	1	1
59	Gata2(Zf)/K562-GATA2-ChIP-Seq(GSE18829)/Homer/BBCTTATCTS	1	1
60	GATA3(Zf)/iTreg-Gata3-ChIP-Seq(GSE20898)/Homer/AGATAASR	1	1
61	Gata4(Zf)/Heart-Gata4-ChIP-Seq(GSE35151)/Homer/NBWGATAAGR	1	1
62	Gata6(Zf)/HUG1N-GATA6-ChIP-Seq(GSE51936)/Homer/YCTTATCTBN	1	1
63	GATA:SCL(Zf,bHLH)/Ter119-SCL-ChIP-Seq(GSE18720)/Homer/CRGCTGBNGNSNNSAGATAA	1	1
64	Gfi1b(Zf)/HPC7-Gfi1b-ChIP-Seq(GSE22178)/Homer/MAATCACTGC	1	1
65	GFX(?)/Promoter/Homer/ATTCTCGCGAGA	1	1
66	GFY(?)/Promoter/Homer/ACTACAATTCCC	1	1
67	GFY-Staf(?,Zf)/Promoter/Homer/RACTACAATTCCCAGAAKGC	1	1
71	IRF8(IRF)/BMDM-IRF8-ChIP-Seq(GSE77884)/Homer/GRAASTGAAAST	1	1
73	Jun-AP1(bZIP)/K562-cJun-ChIP-Seq(GSE31477)/Homer/GATGASTCATCN	1	1
74	JunB(bZIP)/DendriticCells-Junb-ChIP-Seq(GSE36099)/Homer/RATGASTCAT	1	1
75	JunD(bZIP)/K562-JunD-ChIP-Seq/Homer/ATGACGTCATCN	1	1
76	KLF10(Zf)/HEK293-KLF10.GFP-ChIP-Seq(GSE58341)/Homer/GGGGGTGTGTCC	1	1
77	KLF14(Zf)/HEK293-KLF14.GFP-ChIP-Seq(GSE58341)/Homer/RGKGGGCGKGGC	1	1
78	KLF3(Zf)/MEF-Klf3-ChIP-Seq(GSE44748)/Homer/NRGCCCCRCCCHBNN	1	1
79	Klf4(Zf)/mES-Klf4-ChIP-Seq(GSE11431)/Homer/GCCACACCCA	1	1
80	KLF5(Zf)/LoVo-KLF5-ChIP-Seq(GSE49402)/Homer/DGGGYGKGGC	1	1
81	KLF6(Zf)/PDAC-KLF6-ChIP-Seq(GSE64557)/Homer/MKGGGYGTGGCC	1	1
82	Klf9(Zf)/GBM-Klf9-ChIP-Seq(GSE62211)/Homer/GCCACRCCCACY	1	1
85	MafB(bZIP)/BMM-Mafb-ChIP-Seq(GSE75722)/Homer/WNTGCTGASTCAGCANWTTY	1	1
86	MafK(bZIP)/C2C12-MafK-ChIP-Seq(GSE36030)/Homer/GCTGASTCAGCA	1	1
88	Maz(Zf)/HepG2-Maz-ChIP-Seq(GSE31477)/Homer/GGGGGGGG	1	1
89	MITF(bHLH)/MastCells-MITF-ChIP-Seq(GSE48085)/Homer/RTCATGTGAC	1	1
90	MYB(HTH)/ERMYB-Myb-ChIPSeq(GSE22095)/Homer/GGCVGTTR	1	1
91	NF1(CTF)/LNCAP-NF1-ChIP-Seq(Unpublished)/Homer/CYTGGCABNSTGCCAR	1	1
92	NF-E2(bZIP)/K562-NFE2-ChIP-Seq(GSE31477)/Homer/GATGACTCAGCA	1	1
94	NFY(CCAAT)/Promoter/Homer/RGCCAATSRG	1	1
96	NRF1(NRF)/MCF7-NRF1-ChIP-Seq(Unpublished)/Homer/CTGCGCATGCGC	1	1
97	Nrf2(bZIP)/Lymphoblast-Nrf2-ChIP-Seq(GSE37589)/Homer/HTGCTGAGTCAT	1	1
98	NRF(NRF)/Promoter/Homer/STGCGCATGCGC	1	1
101	PBX1(Homeobox)/MCF7-PBX1-ChIP-Seq(GSE28007)/Homer/GSCTGTCACTCA	1	1
102	Pbx3(Homeobox)/GM12878-PBX3-ChIP-Seq(GSE32465)/Homer/SCTGTCAMTCAN	1	1
103	Pknox1(Homeobox)/ES-Prep1-ChIP-Seq(GSE63282)/Homer/SCTGTCAVTCAV	1	1
104	PU.1(ETS)/ThioMac-PU.1-ChIP-Seq(GSE21512)/Homer/AGAGGAAGTG	1	1
105	PU.1:IRF8(ETS:IRF)/pDC-Irf8-ChIP-Seq(GSE66899)/Homer/GGAAGTGAAAST	1	1
106	PU.1-IRF(ETS:IRF)/Bcell-PU.1-ChIP-Seq(GSE21512)/Homer/MGGAAGTGAAAC	1	1
108	Rfx2(HTH)/LoVo-RFX2-ChIP-Seq(GSE49402)/Homer/GTTGCCATGGCAACM	1	1
109	Rfx5(HTH)/GM12878-Rfx5-ChIP-Seq(GSE31477)/Homer/SCCTAGCAACAG	1	1
111	RFX(HTH)/K562-RFX3-ChIP-Seq(SRA012198)/Homer/CGGTTGCCATGGCAAC	1	1
112	Ronin(THAP)/ES-Thap11-ChIP-Seq(GSE51522)/Homer/RACTACAACTCCCAGVAKGC	1	1
113	RUNX1(Runt)/Jurkat-RUNX1-ChIP-Seq(GSE29180)/Homer/AAACCACARM	1	1
114	RUNX2(Runt)/PCa-RUNX2-ChIP-Seq(GSE33889)/Homer/NWAACCACADNN	1	1
115	RUNX-AML(Runt)/CD4+-PolII-ChIP-Seq(Barski_et_al.)/Homer/GCTGTGGTTW	1	1
116	RUNX(Runt)/HPC7-Runx1-ChIP-Seq(GSE22178)/Homer/SAAACCACAG	1	1
117	Smad3(MAD)/NPC-Smad3-ChIP-Seq(GSE36673)/Homer/TWGTCTGV	1	1
118	Sp1(Zf)/Promoter/Homer/GGCCCCGCCCCC	1	1
119	Sp5(Zf)/mES-Sp5.Flag-ChIP-Seq(GSE72989)/Homer/RGKGGGCGGAGC	1	1
120	SPDEF(ETS)/VCaP-SPDEF-ChIP-Seq(SRA014231)/Homer/ASWTCCTGBT	1	1
121	SpiB(ETS)/OCILY3-SPIB-ChIP-Seq(GSE56857)/Homer/AAAGRGGAAGTG	1	1
122	STAT1(Stat)/HelaS3-STAT1-ChIP-Seq(GSE12782)/Homer/NATTTCCNGGAAAT	1	1
123	Stat3+il21(Stat)/CD4-Stat3-ChIP-Seq(GSE19198)/Homer/SVYTTCCNGGAARB	1	1
124	Stat3(Stat)/mES-Stat3-ChIP-Seq(GSE11431)/Homer/CTTCCGGGAA	1	1
128	USF1(bHLH)/GM12878-Usf1-ChIP-Seq(GSE32465)/Homer/SGTCACGTGR	1	1
129	Usf2(bHLH)/C2C12-Usf2-ChIP-Seq(GSE36030)/Homer/GTCACGTGGT	1	1
130	X-box(HTH)/NPC-H3K4me1-ChIP-Seq(GSE16256)/Homer/GGTTGCCATGGCAA	1	1
131	YY1(Zf)/Promoter/Homer/CAAGATGGCGGC	1	1
132	ZBTB33(Zf)/GM12878-ZBTB33-ChIP-Seq(GSE32465)/Homer/GGVTCTCGCGAGAAC	1	1
133	Zfp281(Zf)/ES-Zfp281-ChIP-Seq(GSE81042)/Homer/CCCCTCCCCCAC	1	1
134	ZNF143|STAF(Zf)/CUTLL-ZNF143-ChIP-Seq(GSE29600)/Homer/ATTTCCCAGVAKSCY	1	1
135	ZNF264(Zf)/HEK293-ZNF264.GFP-ChIP-Seq(GSE58341)/Homer/RGGGCACTAACY	1	1
136	ZNF467(Zf)/HEK293-ZNF467.GFP-ChIP-Seq(GSE58341)/Homer/TGGGGAAGGGCM	1	1
137	ZNF519(Zf)/HEK293-ZNF519.GFP-ChIP-Seq(GSE58341)/Homer/GAGSCCGAGC	1	1
3	Arnt:Ahr(bHLH)/MCF7-Arnt-ChIP-Seq(Lo_et_al.)/Homer/TBGCACGCAA	0	1
51	FOXK2(Forkhead)/U2OS-FOXK2-ChIP-Seq(E-MTAB-2204)/Homer/SCHTGTTTACAT	0	1
52	Foxo1(Forkhead)/RAW-Foxo1-ChIP-Seq(Fan_et_al.)/Homer/CTGTTTAC	0	1
53	Foxo3(Forkhead)/U2OS-Foxo3-ChIP-Seq(E-MTAB-2701)/Homer/DGTAAACA	0	1
54	FOXP1(Forkhead)/H9-FOXP1-ChIP-Seq(GSE31006)/Homer/NYYTGTTTACHN	0	1
68	IRF2(IRF)/Erythroblas-IRF2-ChIP-Seq(GSE36985)/Homer/GAAASYGAAASY	0	1
69	IRF3(IRF)/BMDM-Irf3-ChIP-Seq(GSE67343)/Homer/AGTTTCAKTTTC	0	1
70	IRF4(IRF)/GM12878-IRF4-ChIP-Seq(GSE32465)/Homer/ACTGAAACCA	0	1
72	ISRE(IRF)/ThioMac-LPS-Expression(GSE23622)/Homer/AGTTTCASTTTC	0	1
83	Lhx3(Homeobox)/Neuron-Lhx3-ChIP-Seq(GSE31456)/Homer/ADBTAATTAR	0	1
84	MafA(bZIP)/Islet-MafA-ChIP-Seq(GSE30298)/Homer/TGCTGACTCA	0	1
87	Max(bHLH)/K562-Max-ChIP-Seq(GSE31477)/Homer/RCCACGTGGYYN	0	1
93	NFkB-p65-Rel(RHD)/ThioMac-LPS-Expression(GSE23622)/Homer/GGAAATTCCC	0	1
95	n-Myc(bHLH)/mES-nMyc-ChIP-Seq(GSE11431)/Homer/VRCCACGTGG	0	1
107	Rfx1(HTH)/NPC-H3K4me1-ChIP-Seq(GSE16256)/Homer/KGTTGCCATGGCAA	0	1
110	Rfx6(HTH)/Min6b1-Rfx6.HA-ChIP-Seq(GSE62844)/Homer/TGTTKCCTAGCAACM	0	1
126	TFE3(bHLH)/MEF-TFE3-ChIP-Seq(GSE75757)/Homer/GTCACGTGACYV	0	1
127	Tlx?(NR)/NPC-H3K4me1-ChIP-Seq(GSE16256)/Homer/CTGGCAGSCTGCCA	0	1
15	CArG(MADS)/PUER-Srf-ChIP-Seq(Sullivan_et_al.)/Homer/CCATATATGGNM	1	0
16	CEBP:AP1(bZIP)/ThioMac-CEBPb-ChIP-Seq(GSE21512)/Homer/DRTGTTGCAA	1	0
18	Chop(bZIP)/MEF-Chop-ChIP-Seq(GSE35681)/Homer/ATTGCATCAT	1	0
27	E2F6(E2F)/Hela-E2F6-ChIP-Seq(GSE31477)/Homer/GGCGGGAARN	1	0
99	PAX3:FKHR-fusion(Paired,Homeobox)/Rh4-PAX3:FKHR-ChIP-Seq(GSE19063)/Homer/ACCRTGACTAATTNN	1	0
100	PAX5(Paired,Homeobox),condensed/GM12878-PAX5-ChIP-Seq(GSE32465)/Homer/GTCACGCTCSCTGM	1	0
125	STAT4(Stat)/CD4-Stat4-ChIP-Seq(GSE22104)/Homer/NYTTCCWGGAAR	1	0
138	ZNF711(Zf)/SHSY5Y-ZNF711-ChIP-Seq(GSE20673)/Homer/AGGCCTAG	1	0

## Sheet: 3y5_overlap_Motif
universe		A	B
1	AMYB(HTH)/Testes-AMYB-ChIP-Seq(GSE44588)/Homer/TGGCAGTTGG	1	1
2	AP-1(bZIP)/ThioMac-PU.1-ChIP-Seq(GSE21512)/Homer/VTGACTCATC	1	1
3	AP-2alpha(AP2)/Hela-AP2alpha-ChIP-Seq(GSE31477)/Homer/ATGCCCTGAGGC	1	1
4	AP-2gamma(AP2)/MCF7-TFAP2C-ChIP-Seq(GSE21234)/Homer/SCCTSAGGSCAW	1	1
5	Ap4(bHLH)/AML-Tfap4-ChIP-Seq(GSE45738)/Homer/NAHCAGCTGD	1	1
6	ARE(NR)/LNCAP-AR-ChIP-Seq(GSE27824)/Homer/RGRACASNSTGTYCYB	1	1
7	AR-halfsite(NR)/LNCaP-AR-ChIP-Seq(GSE27824)/Homer/CCAGGAACAG	1	1
8	Arnt:Ahr(bHLH)/MCF7-Arnt-ChIP-Seq(Lo_et_al.)/Homer/TBGCACGCAA	1	1
9	Ascl1(bHLH)/NeuralTubes-Ascl1-ChIP-Seq(GSE55840)/Homer/NNVVCAGCTGBN	1	1
10	Atf1(bZIP)/K562-ATF1-ChIP-Seq(GSE31477)/Homer/GATGACGTCA	1	1
11	Atf2(bZIP)/3T3L1-Atf2-ChIP-Seq(GSE56872)/Homer/NRRTGACGTCAT	1	1
12	Atf3(bZIP)/GBM-ATF3-ChIP-Seq(GSE33912)/Homer/DATGASTCATHN	1	1
13	Atf4(bZIP)/MEF-Atf4-ChIP-Seq(GSE35681)/Homer/MTGATGCAAT	1	1
14	Atf7(bZIP)/3T3L1-Atf7-ChIP-Seq(GSE56872)/Homer/NGRTGACGTCAY	1	1
15	Atoh1(bHLH)/Cerebellum-Atoh1-ChIP-Seq(GSE22111)/Homer/VNRVCAGCTGGY	1	1
16	Bach1(bZIP)/K562-Bach1-ChIP-Seq(GSE31477)/Homer/AWWNTGCTGAGTCAT	1	1
17	Bach2(bZIP)/OCILy7-Bach2-ChIP-Seq(GSE44420)/Homer/TGCTGAGTCA	1	1
18	Bapx1(Homeobox)/VertebralCol-Bapx1-ChIP-Seq(GSE36672)/Homer/TTRAGTGSYK	1	1
19	Barx1(Homeobox)/Stomach-Barx1.3xFlag-ChIP-Seq(GSE69483)/Homer/AAACMATTAN	1	1
20	BATF(bZIP)/Th17-BATF-ChIP-Seq(GSE39756)/Homer/DATGASTCAT	1	1
21	Bcl6(Zf)/Liver-Bcl6-ChIP-Seq(GSE31578)/Homer/NNNCTTTCCAGGAAA	1	1
22	bHLHE40(bHLH)/HepG2-BHLHE40-ChIP-Seq(GSE31477)/Homer/KCACGTGMCN	1	1
23	BMAL1(bHLH)/Liver-Bmal1-ChIP-Seq(GSE39860)/Homer/GNCACGTG	1	1
24	BMYB(HTH)/Hela-BMYB-ChIP-Seq(GSE27030)/Homer/NHAACBGYYV	1	1
25	BORIS(Zf)/K562-CTCFL-ChIP-Seq(GSE32465)/Homer/CNNBRGCGCCCCCTGSTGGC	1	1
26	Brachyury(T-box)/Mesoendoderm-Brachyury-ChIP-exo(GSE54963)/Homer/ANTTMRCASBNNNGTGYKAAN	1	1
27	Brn1(POU,Homeobox)/NPC-Brn1-ChIP-Seq(GSE35496)/Homer/TATGCWAATBAV	1	1
28	Brn2(POU,Homeobox)/NPC-Brn2-ChIP-Seq(GSE35496)/Homer/ATGAATATTC	1	1
29	bZIP:IRF(bZIP,IRF)/Th17-BatF-ChIP-Seq(GSE39756)/Homer/NAGTTTCABTHTGACTNW	1	1
30	CArG(MADS)/PUER-Srf-ChIP-Seq(Sullivan_et_al.)/Homer/CCATATATGGNM	1	1
31	Cdx2(Homeobox)/mES-Cdx2-ChIP-Seq(GSE14586)/Homer/GYMATAAAAH	1	1
32	CDX4(Homeobox)/ZebrafishEmbryos-Cdx4.Myc-ChIP-Seq(GSE48254)/Homer/NGYCATAAAWCH	1	1
33	CEBP:AP1(bZIP)/ThioMac-CEBPb-ChIP-Seq(GSE21512)/Homer/DRTGTTGCAA	1	1
34	CEBP(bZIP)/ThioMac-CEBPb-ChIP-Seq(GSE21512)/Homer/ATTGCGCAAC	1	1
35	CEBP:CEBP(bZIP)/MEF-Chop-ChIP-Seq(GSE35681)/Homer/NTNATGCAAYMNNHTGMAAY	1	1
36	Chop(bZIP)/MEF-Chop-ChIP-Seq(GSE35681)/Homer/ATTGCATCAT	1	1
37	CHR(?)/Hela-CellCycle-Expression/Homer/SRGTTTCAAA	1	1
38	c-Jun-CRE(bZIP)/K562-cJun-ChIP-Seq(GSE31477)/Homer/ATGACGTCATCY	1	1
39	CLOCK(bHLH)/Liver-Clock-ChIP-Seq(GSE39860)/Homer/GHCACGTG	1	1
40	c-Myc(bHLH)/LNCAP-cMyc-ChIP-Seq(Unpublished)/Homer/VCCACGTG	1	1
41	c-Myc(bHLH)/mES-cMyc-ChIP-Seq(GSE11431)/Homer/VVCCACGTGG	1	1
42	COUP-TFII(NR)/Artia-Nr2f2-ChIP-Seq(GSE46497)/Homer/AGRGGTCA	1	1
43	CRE(bZIP)/Promoter/Homer/CSGTGACGTCAC	1	1
44	CRX(Homeobox)/Retina-Crx-ChIP-Seq(GSE20012)/Homer/GCTAATCC	1	1
45	CTCF-SatelliteElement(Zf?)/CD4+-CTCF-ChIP-Seq(Barski_et_al.)/Homer/TGCAGTTCCMVNWRTGGCCA	1	1
46	CTCF(Zf)/CD4+-CTCF-ChIP-Seq(Barski_et_al.)/Homer/AYAGTGCCMYCTRGTGGCCA	1	1
47	Cux2(Homeobox)/Liver-Cux2-ChIP-Seq(GSE35985)/Homer/HNRAATCAAT	1	1
48	DMRT1(DM)/Testis-DMRT1-ChIP-Seq(GSE64892)/Homer/TWGHWACAWTGTWDC	1	1
49	DMRT6(DM)/Testis-DMRT6-ChIP-Seq(GSE60440)/Homer/YDGHTACAWTGTADC	1	1
50	DUX4(Homeobox)/Myoblasts-DUX4.V5-ChIP-Seq(GSE75791)/Homer/NWTAAYCYAATCAWN	1	1
51	E2A(bHLH),near_PU.1/Bcell-PU.1-ChIP-Seq(GSE21512)/Homer/NVCACCTGBN	1	1
52	E2A(bHLH)/proBcell-E2A-ChIP-Seq(GSE21978)/Homer/DNRCAGCTGY	1	1
53	E2F1(E2F)/Hela-E2F1-ChIP-Seq(GSE22478)/Homer/CWGGCGGGAA	1	1
54	E2F3(E2F)/MEF-E2F3-ChIP-Seq(GSE71376)/Homer/BTKGGCGGGAAA	1	1
55	E2F4(E2F)/K562-E2F4-ChIP-Seq(GSE31477)/Homer/GGCGGGAAAH	1	1
56	E2F6(E2F)/Hela-E2F6-ChIP-Seq(GSE31477)/Homer/GGCGGGAARN	1	1
57	E2F7(E2F)/Hela-E2F7-ChIP-Seq(GSE32673)/Homer/VDTTTCCCGCCA	1	1
58	E2F(E2F)/Hela-CellCycle-Expression/Homer/TTSGCGCGAAAA	1	1
59	EBF1(EBF)/Near-E2A-ChIP-Seq(GSE21512)/Homer/GTCCCCWGGGGA	1	1
60	EBF(EBF)/proBcell-EBF-ChIP-Seq(GSE21978)/Homer/DGTCCCYRGGGA	1	1
61	EBNA1(EBV-virus)/Raji-EBNA1-ChIP-Seq(GSE30709)/Homer/GGYAGCAYDTGCTDCCCNNN	1	1
62	E-box(bHLH)/Promoter/Homer/SSGGTCACGTGA	1	1
63	Egr1(Zf)/K562-Egr1-ChIP-Seq(GSE32465)/Homer/TGCGTGGGYG	1	1
64	Egr2(Zf)/Thymocytes-Egr2-ChIP-Seq(GSE34254)/Homer/NGCGTGGGCGGR	1	1
65	EHF(ETS)/LoVo-EHF-ChIP-Seq(GSE49402)/Homer/AVCAGGAAGT	1	1
66	EKLF(Zf)/Erythrocyte-Klf1-ChIP-Seq(GSE20478)/Homer/NWGGGTGTGGCY	1	1
67	ELF1(ETS)/Jurkat-ELF1-ChIP-Seq(SRA014231)/Homer/AVCCGGAAGT	1	1
68	ELF3(ETS)/PDAC-ELF3-ChIP-Seq(GSE64557)/Homer/ANCAGGAAGT	1	1
69	ELF5(ETS)/T47D-ELF5-ChIP-Seq(GSE30407)/Homer/ACVAGGAAGT	1	1
70	Elk1(ETS)/Hela-Elk1-ChIP-Seq(GSE31477)/Homer/HACTTCCGGY	1	1
71	Elk4(ETS)/Hela-Elk4-ChIP-Seq(GSE31477)/Homer/NRYTTCCGGY	1	1
72	Eomes(T-box)/H9-Eomes-ChIP-Seq(GSE26097)/Homer/ATTAACACCT	1	1
73	ERE(NR),IR3/MCF7-ERa-ChIP-Seq(Unpublished)/Homer/VAGGTCACNSTGACC	1	1
74	ERG(ETS)/VCaP-ERG-ChIP-Seq(GSE14097)/Homer/ACAGGAAGTG	1	1
75	Erra(NR)/HepG2-Erra-ChIP-Seq(GSE31477)/Homer/CAAAGGTCAG	1	1
76	Esrrb(NR)/mES-Esrrb-ChIP-Seq(GSE11431)/Homer/KTGACCTTGA	1	1
77	Ets1-distal(ETS)/CD4+-PolII-ChIP-Seq(Barski_et_al.)/Homer/MACAGGAAGT	1	1
78	ETS1(ETS)/Jurkat-ETS1-ChIP-Seq(GSE17954)/Homer/ACAGGAAGTG	1	1
79	ETS:E-box(ETS,bHLH)/HPC7-Scl-ChIP-Seq(GSE22178)/Homer/AGGAARCAGCTG	1	1
80	ETS(ETS)/Promoter/Homer/AACCGGAAGT	1	1
81	ETS:RUNX(ETS,Runt)/Jurkat-RUNX1-ChIP-Seq(GSE17954)/Homer/RCAGGATGTGGT	1	1
82	ETV1(ETS)/GIST48-ETV1-ChIP-Seq(GSE22441)/Homer/AACCGGAAGT	1	1
83	Etv2(ETS)/ES-ER71-ChIP-Seq(GSE59402)/Homer(0.967)/NNAYTTCCTGHN	1	1
84	EWS:ERG-fusion(ETS)/CADO_ES1-EWS:ERG-ChIP-Seq(SRA014231)/Homer/ATTTCCTGTN	1	1
85	EWS:FLI1-fusion(ETS)/SK_N_MC-EWS:FLI1-ChIP-Seq(SRA014231)/Homer/VACAGGAAAT	1	1
86	Fli1(ETS)/CD8-FLI-ChIP-Seq(GSE20898)/Homer/NRYTTCCGGH	1	1
87	Fosl2(bZIP)/3T3L1-Fosl2-ChIP-Seq(GSE56872)/Homer/NATGASTCABNN	1	1
88	FOXA1:AR(Forkhead,NR)/LNCAP-AR-ChIP-Seq(GSE27824)/Homer/AGTAAACAAAAAAGAACAND	1	1
89	FOXA1(Forkhead)/LNCAP-FOXA1-ChIP-Seq(GSE27824)/Homer/WAAGTAAACA	1	1
90	FOXA1(Forkhead)/MCF7-FOXA1-ChIP-Seq(GSE26831)/Homer/WAAGTAAACA	1	1
91	Foxa2(Forkhead)/Liver-Foxa2-ChIP-Seq(GSE25694)/Homer/CYTGTTTACWYW	1	1
92	Foxa3(Forkhead)/Liver-Foxa3-ChIP-Seq(GSE77670)/Homer/BSNTGTTTACWYWGN	1	1
93	Fox:Ebox(Forkhead,bHLH)/Panc1-Foxa2-ChIP-Seq(GSE47459)/Homer/NNNVCTGWGYAAACASN	1	1
94	Foxf1(Forkhead)/Lung-Foxf1-ChIP-Seq(GSE77951)/Homer/WWATRTAAACAN	1	1
95	Foxh1(Forkhead)/hESC-FOXH1-ChIP-Seq(GSE29422)/Homer/NNTGTGGATTSS	1	1
96	FOXK1(Forkhead)/HEK293-FOXK1-ChIP-Seq(GSE51673)/Homer/NVWTGTTTAC	1	1
97	FOXK2(Forkhead)/U2OS-FOXK2-ChIP-Seq(E-MTAB-2204)/Homer/SCHTGTTTACAT	1	1
98	FoxL2(Forkhead)/Ovary-FoxL2-ChIP-Seq(GSE60858)/Homer/WWTRTAAACAVG	1	1
99	FOXM1(Forkhead)/MCF7-FOXM1-ChIP-Seq(GSE72977)/Homer/TRTTTACTTW	1	1
100	Foxo1(Forkhead)/RAW-Foxo1-ChIP-Seq(Fan_et_al.)/Homer/CTGTTTAC	1	1
101	Foxo3(Forkhead)/U2OS-Foxo3-ChIP-Seq(E-MTAB-2701)/Homer/DGTAAACA	1	1
102	FOXP1(Forkhead)/H9-FOXP1-ChIP-Seq(GSE31006)/Homer/NYYTGTTTACHN	1	1
103	Fra1(bZIP)/BT549-Fra1-ChIP-Seq(GSE46166)/Homer/NNATGASTCATH	1	1
104	Fra2(bZIP)/Striatum-Fra2-ChIP-Seq(GSE43429)/Homer/GGATGACTCATC	1	1
105	FXR(NR),IR1/Liver-FXR-ChIP-Seq(Chong_et_al.)/Homer/AGGTCANTGACCTB	1	1
106	GABPA(ETS)/Jurkat-GABPa-ChIP-Seq(GSE17954)/Homer/RACCGGAAGT	1	1
107	Gata1(Zf)/K562-GATA1-ChIP-Seq(GSE18829)/Homer/SAGATAAGRV	1	1
108	Gata2(Zf)/K562-GATA2-ChIP-Seq(GSE18829)/Homer/BBCTTATCTS	1	1
109	GATA3(Zf),DR4/iTreg-Gata3-ChIP-Seq(GSE20898)/Homer/AGATGKDGAGATAAG	1	1
110	GATA3(Zf),DR8/iTreg-Gata3-ChIP-Seq(GSE20898)/Homer/AGATSTNDNNDSAGATAASN	1	1
111	GATA3(Zf)/iTreg-Gata3-ChIP-Seq(GSE20898)/Homer/AGATAASR	1	1
112	Gata4(Zf)/Heart-Gata4-ChIP-Seq(GSE35151)/Homer/NBWGATAAGR	1	1
113	Gata6(Zf)/HUG1N-GATA6-ChIP-Seq(GSE51936)/Homer/YCTTATCTBN	1	1
114	GATA:SCL(Zf,bHLH)/Ter119-SCL-ChIP-Seq(GSE18720)/Homer/CRGCTGBNGNSNNSAGATAA	1	1
115	GATA(Zf),IR3/iTreg-Gata3-ChIP-Seq(GSE20898)/Homer/NNNNNBAGATAWYATCTVHN	1	1
116	GATA(Zf),IR4/iTreg-Gata3-ChIP-Seq(GSE20898)/Homer/NAGATWNBNATCTNN	1	1
117	Gfi1b(Zf)/HPC7-Gfi1b-ChIP-Seq(GSE22178)/Homer/MAATCACTGC	1	1
118	GFX(?)/Promoter/Homer/ATTCTCGCGAGA	1	1
119	GFY(?)/Promoter/Homer/ACTACAATTCCC	1	1
120	GFY-Staf(?,Zf)/Promoter/Homer/RACTACAATTCCCAGAAKGC	1	1
121	GLI3(Zf)/Limb-GLI3-ChIP-Chip(GSE11077)/Homer/CGTGGGTGGTCC	1	1
122	GRE(NR),IR3/A549-GR-ChIP-Seq(GSE32465)/Homer/NRGVACABNVTGTYCY	1	1
123	GRE(NR),IR3/RAW264.7-GRE-ChIP-Seq(Unpublished)/Homer/VAGRACAKWCTGTYC	1	1
124	GRHL2(CP2)/HBE-GRHL2-ChIP-Seq(GSE46194)/Homer/AAACYKGTTWDACMRGTTTB	1	1
125	GSC(Homeobox)/FrogEmbryos-GSC-ChIP-Seq(DRA000576)/Homer/RGGATTAR	1	1
126	Hand2(bHLH)/Mesoderm-Hand2-ChIP-Seq(GSE61475)/Homer/TGACANARRCCAGRC	1	1
127	HEB(bHLH)/mES-Heb-ChIP-Seq(GSE53233)/Homer/VCAGCTGBNN	1	1
128	HIF-1a(bHLH)/MCF7-HIF1a-ChIP-Seq(GSE28352)/Homer/TACGTGCV	1	1
129	HIF-1b(HLH)/T47D-HIF1b-ChIP-Seq(GSE59937)/Homer/RTACGTGC	1	1
130	HIF2a(bHLH)/785_O-HIF2a-ChIP-Seq(GSE34871)/Homer/GCACGTACCC	1	1
131	HLF(bZIP)/HSC-HLF.Flag-ChIP-Seq(GSE69817)/Homer/RTTATGYAAB	1	1
132	HNF1b(Homeobox)/PDAC-HNF1B-ChIP-Seq(GSE64557)/Homer/GTTAATNATTAA	1	1
133	Hnf1(Homeobox)/Liver-Foxa2-Chip-Seq(GSE25694)/Homer/GGTTAAWCATTAA	1	1
134	HNF4a(NR),DR1/HepG2-HNF4a-ChIP-Seq(GSE25021)/Homer/CARRGKBCAAAGTYCA	1	1
135	HNF6(Homeobox)/Liver-Hnf6-ChIP-Seq(ERP000394)/Homer/NTATYGATCH	1	1
136	HOXA2(Homeobox)/mES-Hoxa2-ChIP-Seq(Donaldson_et_al.)/Homer/GYCATCMATCAT	1	1
137	HOXA9(Homeobox)/HSC-Hoxa9-ChIP-Seq(GSE33509)/Homer/GGCCATAAATCA	1	1
138	HOXB13(Homeobox)/ProstateTumor-HOXB13-ChIP-Seq(GSE56288)/Homer/TTTTATKRGG	1	1
139	Hoxb4(Homeobox)/ES-Hoxb4-ChIP-Seq(GSE34014)/Homer/TGATTRATGGCY	1	1
140	Hoxc9(Homeobox)/Ainv15-Hoxc9-ChIP-Seq(GSE21812)/Homer/GGCCATAAATCA	1	1
141	HOXD13(Homeobox)/Chicken-Hoxd13-ChIP-Seq(GSE38910)/Homer/NCYAATAAAA	1	1
142	HRE(HSF)/HepG2-HSF1-ChIP-Seq(GSE31477)/Homer/BSTTCTRGAABVTTCYAGAA	1	1
143	HRE(HSF)/Striatum-HSF1-ChIP-Seq(GSE38000)/Homer/TTCTAGAABNTTCTA	1	1
144	IRF1(IRF)/PBMC-IRF1-ChIP-Seq(GSE43036)/Homer/GAAAGTGAAAGT	1	1
145	IRF2(IRF)/Erythroblas-IRF2-ChIP-Seq(GSE36985)/Homer/GAAASYGAAASY	1	1
146	IRF3(IRF)/BMDM-Irf3-ChIP-Seq(GSE67343)/Homer/AGTTTCAKTTTC	1	1
147	IRF4(IRF)/GM12878-IRF4-ChIP-Seq(GSE32465)/Homer/ACTGAAACCA	1	1
148	IRF8(IRF)/BMDM-IRF8-ChIP-Seq(GSE77884)/Homer/GRAASTGAAAST	1	1
149	IRF:BATF(IRF:bZIP)/pDC-Irf8-ChIP-Seq(GSE66899)/Homer/CTTTCANTATGACTV	1	1
150	Isl1(Homeobox)/Neuron-Isl1-ChIP-Seq(GSE31456)/Homer/CTAATKGV	1	1
151	ISRE(IRF)/ThioMac-LPS-Expression(GSE23622)/Homer/AGTTTCASTTTC	1	1
152	Jun-AP1(bZIP)/K562-cJun-ChIP-Seq(GSE31477)/Homer/GATGASTCATCN	1	1
153	JunB(bZIP)/DendriticCells-Junb-ChIP-Seq(GSE36099)/Homer/RATGASTCAT	1	1
154	JunD(bZIP)/K562-JunD-ChIP-Seq/Homer/ATGACGTCATCN	1	1
155	KLF10(Zf)/HEK293-KLF10.GFP-ChIP-Seq(GSE58341)/Homer/GGGGGTGTGTCC	1	1
156	KLF14(Zf)/HEK293-KLF14.GFP-ChIP-Seq(GSE58341)/Homer/RGKGGGCGKGGC	1	1
157	KLF3(Zf)/MEF-Klf3-ChIP-Seq(GSE44748)/Homer/NRGCCCCRCCCHBNN	1	1
158	Klf4(Zf)/mES-Klf4-ChIP-Seq(GSE11431)/Homer/GCCACACCCA	1	1
159	KLF5(Zf)/LoVo-KLF5-ChIP-Seq(GSE49402)/Homer/DGGGYGKGGC	1	1
160	KLF6(Zf)/PDAC-KLF6-ChIP-Seq(GSE64557)/Homer/MKGGGYGTGGCC	1	1
161	Klf9(Zf)/GBM-Klf9-ChIP-Seq(GSE62211)/Homer/GCCACRCCCACY	1	1
162	Lhx1(Homeobox)/EmbryoCarcinoma-Lhx1-ChIP-Seq(GSE70957)/Homer/NNYTAATTAR	1	1
163	Lhx2(Homeobox)/HFSC-Lhx2-ChIP-Seq(GSE48068)/Homer/TAATTAGN	1	1
164	Lhx3(Homeobox)/Neuron-Lhx3-ChIP-Seq(GSE31456)/Homer/ADBTAATTAR	1	1
165	LRF(Zf)/Erythroblasts-ZBTB7A-ChIP-Seq(GSE74977)/Homer/AAGACCCYYN	1	1
166	LXRE(NR),DR4/RAW-LXRb.biotin-ChIP-Seq(GSE21512)/Homer/RGGTTACTANAGGTCA	1	1
167	MafA(bZIP)/Islet-MafA-ChIP-Seq(GSE30298)/Homer/TGCTGACTCA	1	1
168	MafB(bZIP)/BMM-Mafb-ChIP-Seq(GSE75722)/Homer/WNTGCTGASTCAGCANWTTY	1	1
169	MafF(bZIP)/HepG2-MafF-ChIP-Seq(GSE31477)/Homer/HWWGTCAGCAWWTTT	1	1
170	MafK(bZIP)/C2C12-MafK-ChIP-Seq(GSE36030)/Homer/GCTGASTCAGCA	1	1
171	Max(bHLH)/K562-Max-ChIP-Seq(GSE31477)/Homer/RCCACGTGGYYN	1	1
172	Maz(Zf)/HepG2-Maz-ChIP-Seq(GSE31477)/Homer/GGGGGGGG	1	1
173	Mef2a(MADS)/HL1-Mef2a.biotin-ChIP-Seq(GSE21529)/Homer/CYAAAAATAG	1	1
174	Mef2b(MADS)/HEK293-Mef2b.V5-ChIP-Seq(GSE67450)/Homer/GCTATTTTTGGM	1	1
175	Mef2c(MADS)/GM12878-Mef2c-ChIP-Seq(GSE32465)/Homer/DCYAAAAATAGM	1	1
176	Mef2d(MADS)/Retina-Mef2d-ChIP-Seq(GSE61391)/Homer/GCTATTTTTAGC	1	1
177	Meis1(Homeobox)/MastCells-Meis1-ChIP-Seq(GSE48085)/Homer/VGCTGWCAVB	1	1
178	MITF(bHLH)/MastCells-MITF-ChIP-Seq(GSE48085)/Homer/RTCATGTGAC	1	1
179	Mouse_Recombination_Hotspot(Zf)/Testis-DMC1-ChIP-Seq(GSE24438)/Homer/ACTYKNATTCGTGNTACTTC	1	1
180	MYB(HTH)/ERMYB-Myb-ChIPSeq(GSE22095)/Homer/GGCVGTTR	1	1
181	Myf5(bHLH)/GM-Myf5-ChIP-Seq(GSE24852)/Homer/BAACAGCTGT	1	1
182	MyoD(bHLH)/Myotube-MyoD-ChIP-Seq(GSE21614)/Homer/RRCAGCTGYTSY	1	1
183	MyoG(bHLH)/C2C12-MyoG-ChIP-Seq(GSE36024)/Homer/AACAGCTG	1	1
184	Nanog(Homeobox)/mES-Nanog-ChIP-Seq(GSE11724)/Homer/RGCCATTAAC	1	1
185	NeuroD1(bHLH)/Islet-NeuroD1-ChIP-Seq(GSE30298)/Homer/GCCATCTGTT	1	1
186	NeuroG2(bHLH)/Fibroblast-NeuroG2-ChIP-Seq(GSE75910)/Homer/ACCATCTGTT	1	1
187	NF1(CTF)/LNCAP-NF1-ChIP-Seq(Unpublished)/Homer/CYTGGCABNSTGCCAR	1	1
188	NF1:FOXA1(CTF,Forkhead)/LNCAP-FOXA1-ChIP-Seq(GSE27824)/Homer/WNTGTTTRYTTTGGCA	1	1
189	NF1-halfsite(CTF)/LNCaP-NF1-ChIP-Seq(Unpublished)/Homer/YTGCCAAG	1	1
190	NFAT:AP1(RHD,bZIP)/Jurkat-NFATC1-ChIP-Seq(Jolma_et_al.)/Homer/SARTGGAAAAWRTGAGTCAB	1	1
191	NFAT(RHD)/Jurkat-NFATC1-ChIP-Seq(Jolma_et_al.)/Homer/ATTTTCCATT	1	1
192	NF-E2(bZIP)/K562-NFE2-ChIP-Seq(GSE31477)/Homer/GATGACTCAGCA	1	1
193	NFkB-p50,p52(RHD)/Monocyte-p50-ChIP-Chip(Schreiber_et_al.)/Homer/GGGGGAATCCCC	1	1
194	NFkB-p65-Rel(RHD)/ThioMac-LPS-Expression(GSE23622)/Homer/GGAAATTCCC	1	1
195	NFkB-p65(RHD)/GM12787-p65-ChIP-Seq(GSE19485)/Homer/WGGGGATTTCCC	1	1
196	NFY(CCAAT)/Promoter/Homer/RGCCAATSRG	1	1
197	Nkx2.1(Homeobox)/LungAC-Nkx2.1-ChIP-Seq(GSE43252)/Homer/RSCACTYRAG	1	1
198	Nkx2.2(Homeobox)/NPC-Nkx2.2-ChIP-Seq(GSE61673)/Homer/BTBRAGTGSN	1	1
199	Nkx2.5(Homeobox)/HL1-Nkx2.5.biotin-ChIP-Seq(GSE21529)/Homer/RRSCACTYAA	1	1
200	Nkx3.1(Homeobox)/LNCaP-Nkx3.1-ChIP-Seq(GSE28264)/Homer/AAGCACTTAA	1	1
201	Nkx6.1(Homeobox)/Islet-Nkx6.1-ChIP-Seq(GSE40975)/Homer/GKTAATGR	1	1
202	n-Myc(bHLH)/mES-nMyc-ChIP-Seq(GSE11431)/Homer/VRCCACGTGG	1	1
203	NPAS2(bHLH)/Liver-NPAS2-ChIP-Seq(GSE39860)/Homer/KCCACGTGAC	1	1
204	NPAS(bHLH)/Liver-NPAS-ChIP-Seq(GSE39860)/Homer/NVCACGTG	1	1
205	Nr5a2(NR)/mES-Nr5a2-ChIP-Seq(GSE19019)/Homer/BTCAAGGTCA	1	1
206	Nr5a2(NR)/Pancreas-LRH1-ChIP-Seq(GSE34295)/Homer/BTCAAGGTCA	1	1
207	NRF1(NRF)/MCF7-NRF1-ChIP-Seq(Unpublished)/Homer/CTGCGCATGCGC	1	1
208	Nrf2(bZIP)/Lymphoblast-Nrf2-ChIP-Seq(GSE37589)/Homer/HTGCTGAGTCAT	1	1
209	NRF(NRF)/Promoter/Homer/STGCGCATGCGC	1	1
210	Nur77(NR)/K562-NR4A1-ChIP-Seq(GSE31363)/Homer/TGACCTTTNCNT	1	1
211	Oct2(POU,Homeobox)/Bcell-Oct2-ChIP-Seq(GSE21512)/Homer/ATATGCAAAT	1	1
212	Oct4(POU,Homeobox)/mES-Oct4-ChIP-Seq(GSE11431)/Homer/ATTTGCATAW	1	1
213	Oct4:Sox17(POU,Homeobox,HMG)/F9-Sox17-ChIP-Seq(GSE44553)/Homer/CCATTGTATGCAAAT	1	1
214	OCT4-SOX2-TCF-NANOG(POU,Homeobox,HMG)/mES-Oct4-ChIP-Seq(GSE11431)/Homer/ATTTGCATAACAATG	1	1
215	Oct6(POU,Homeobox)/NPC-Pou3f1-ChIP-Seq(GSE35496)/Homer/WATGCAAATGAG	1	1
216	OCT:OCT(POU,Homeobox,IR1)/NPC-Brn2-ChIP-Seq(GSE35496)/Homer/ATGAATWATTCATGA	1	1
217	OCT:OCT(POU,Homeobox)/NPC-Brn1-ChIP-Seq(GSE35496)/Homer/ATGAATATTCATGAG	1	1
218	OCT:OCT(POU,Homeobox)/NPC-OCT6-ChIP-Seq(GSE43916)/Homer/YATGCATATRCATRT	1	1
219	OCT:OCT-short(POU,Homeobox)/NPC-OCT6-ChIP-Seq(GSE43916)/Homer/ATGCATWATGCATRW	1	1
220	Olig2(bHLH)/Neuron-Olig2-ChIP-Seq(GSE30882)/Homer/RCCATMTGTT	1	1
221	Otx2(Homeobox)/EpiLC-Otx2-ChIP-Seq(GSE56098)/Homer/NYTAATCCYB	1	1
222	p53(p53)/mES-cMyc-ChIP-Seq(GSE11431)/Homer/ACATGCCCGGGCAT	1	1
223	p53(p53)/Saos-p53-ChIP-Seq(GSE15780)/Homer/RRCATGYCYRGRCATGYYYN	1	1
224	p53(p53)/Saos-p53-ChIP-Seq/Homer/RRCATGYCYRGRCATGYYYN	1	1
225	p63(p53)/Keratinocyte-p63-ChIP-Seq(GSE17611)/Homer/NNDRCATGYCYNRRCATGYH	1	1
226	p73(p53)/Trachea-p73-ChIP-Seq(PRJNA310161)/Homer/NRRRCAWGTCCDGRCATGYY	1	1
227	PAX3:FKHR-fusion(Paired,Homeobox)/Rh4-PAX3:FKHR-ChIP-Seq(GSE19063)/Homer/ACCRTGACTAATTNN	1	1
228	PAX5(Paired,Homeobox),condensed/GM12878-PAX5-ChIP-Seq(GSE32465)/Homer/GTCACGCTCSCTGM	1	1
229	PAX5(Paired,Homeobox)/GM12878-PAX5-ChIP-Seq(GSE32465)/Homer/GCAGCCAAGCRTGACH	1	1
230	PAX6(Paired,Homeobox)/Forebrain-Pax6-ChIP-Seq(GSE66961)/Homer/NGTGTTCAVTSAAGCGKAAA	1	1
231	Pax7(Paired,Homeobox),longest/Myoblast-Pax7-ChIP-Seq(GSE25064)/Homer/NTAATTDGCYAATTANNWWD	1	1
232	Pax7(Paired,Homeobox),long/Myoblast-Pax7-ChIP-Seq(GSE25064)/Homer/TAATCHGATTAC	1	1
233	Pax7(Paired,Homeobox)/Myoblast-Pax7-ChIP-Seq(GSE25064)/Homer/TAATCAATTA	1	1
234	Pax8(Paired,Homeobox)/Thyroid-Pax8-ChIP-Seq(GSE26938)/Homer/GTCATGCHTGRCTGS	1	1
235	PBX1(Homeobox)/MCF7-PBX1-ChIP-Seq(GSE28007)/Homer/GSCTGTCACTCA	1	1
236	Pbx3(Homeobox)/GM12878-PBX3-ChIP-Seq(GSE32465)/Homer/SCTGTCAMTCAN	1	1
237	Pdx1(Homeobox)/Islet-Pdx1-ChIP-Seq(SRA008281)/Homer/YCATYAATCA	1	1
238	PGR(NR)/EndoStromal-PGR-ChIP-Seq(GSE69539)/Homer/AAGAACATWHTGTTC	1	1
239	Phox2a(Homeobox)/Neuron-Phox2a-ChIP-Seq(GSE31456)/Homer/YTAATYNRATTA	1	1
240	Pit1+1bp(Homeobox)/GCrat-Pit1-ChIP-Seq(GSE58009)/Homer/ATGCATAATTCA	1	1
241	Pit1(Homeobox)/GCrat-Pit1-ChIP-Seq(GSE58009)/Homer/ATGMATATDC	1	1
242	Pitx1:Ebox(Homeobox,bHLH)/Hindlimb-Pitx1-ChIP-Seq(GSE41591)/Homer/YTAATTRAWWCCAGATGT	1	1
243	Pitx1(Homeobox)/Chicken-Pitx1-ChIP-Seq(GSE38910)/Homer/TAATCCCN	1	1
244	Pknox1(Homeobox)/ES-Prep1-ChIP-Seq(GSE63282)/Homer/SCTGTCAVTCAV	1	1
245	PPARE(NR),DR1/3T3L1-Pparg-ChIP-Seq(GSE13511)/Homer/TGACCTTTGCCCCA	1	1
246	PRDM14(Zf)/H1-PRDM14-ChIP-Seq(GSE22767)/Homer/RGGTCTCTAACY	1	1
247	PRDM1(Zf)/Hela-PRDM1-ChIP-Seq(GSE31477)/Homer/ACTTTCACTTTC	1	1
248	PRDM9(Zf)/Testis-DMC1-ChIP-Seq(GSE35498)/Homer/ADGGYAGYAGCATCT	1	1
249	PR(NR)/T47D-PR-ChIP-Seq(GSE31130)/Homer/VAGRACAKNCTGTBC	1	1
250	Prop1(Homeobox)/GHFT1-PROP1.biotin-ChIP-Seq(GSE77302)/Homer/NTAATBNAATTA	1	1
251	Ptf1a(bHLH)/Panc1-Ptf1a-ChIP-Seq(GSE47459)/Homer/ACAGCTGTTN	1	1
252	PU.1(ETS)/ThioMac-PU.1-ChIP-Seq(GSE21512)/Homer/AGAGGAAGTG	1	1
253	PU.1:IRF8(ETS:IRF)/pDC-Irf8-ChIP-Seq(GSE66899)/Homer/GGAAGTGAAAST	1	1
254	PU.1-IRF(ETS:IRF)/Bcell-PU.1-ChIP-Seq(GSE21512)/Homer/MGGAAGTGAAAC	1	1
255	RARg(NR)/ES-RARg-ChIP-Seq(GSE30538)/Homer/AGGTCAAGGTCA	1	1
256	RAR:RXR(NR),DR5/ES-RAR-ChIP-Seq(GSE56893)/Homer/AGGTCAAGGTCA	1	1
257	RAR:RXR(NR),DR5/ES-RAR-ChIP-Seq(GSE56893)/Homer/RGGTCADNNAGAGGTCAV	1	1
258	Rbpj1(?)/Panc1-Rbpj1-ChIP-Seq(GSE47459)/Homer/HTTTCCCASG	1	1
259	RBPJ:Ebox(?,bHLH)/Panc1-Rbpj1-ChIP-Seq(GSE47459)/Homer/GGGRAARRGRMCAGMTG	1	1
260	REST-NRSF(Zf)/Jurkat-NRSF-ChIP-Seq/Homer/GGMGCTGTCCATGGTGCTGA	1	1
261	Reverb(NR),DR2/RAW-Reverba.biotin-ChIP-Seq(GSE45914)/Homer/GTRGGTCASTGGGTCA	1	1
262	Rfx1(HTH)/NPC-H3K4me1-ChIP-Seq(GSE16256)/Homer/KGTTGCCATGGCAA	1	1
263	Rfx2(HTH)/LoVo-RFX2-ChIP-Seq(GSE49402)/Homer/GTTGCCATGGCAACM	1	1
264	Rfx5(HTH)/GM12878-Rfx5-ChIP-Seq(GSE31477)/Homer/SCCTAGCAACAG	1	1
265	Rfx6(HTH)/Min6b1-Rfx6.HA-ChIP-Seq(GSE62844)/Homer/TGTTKCCTAGCAACM	1	1
266	RFX(HTH)/K562-RFX3-ChIP-Seq(SRA012198)/Homer/CGGTTGCCATGGCAAC	1	1
267	Ronin(THAP)/ES-Thap11-ChIP-Seq(GSE51522)/Homer/RACTACAACTCCCAGVAKGC	1	1
268	RORgt(NR)/EL4-RORgt.Flag-ChIP-Seq(GSE56019)/Homer/AAYTAGGTCA	1	1
269	RUNX1(Runt)/Jurkat-RUNX1-ChIP-Seq(GSE29180)/Homer/AAACCACARM	1	1
270	RUNX2(Runt)/PCa-RUNX2-ChIP-Seq(GSE33889)/Homer/NWAACCACADNN	1	1
271	RUNX-AML(Runt)/CD4+-PolII-ChIP-Seq(Barski_et_al.)/Homer/GCTGTGGTTW	1	1
272	RUNX(Runt)/HPC7-Runx1-ChIP-Seq(GSE22178)/Homer/SAAACCACAG	1	1
273	RXR(NR),DR1/3T3L1-RXR-ChIP-Seq(GSE13511)/Homer/TAGGGCAAAGGTCA	1	1
274	SCL(bHLH)/HPC7-Scl-ChIP-Seq(GSE13511)/Homer/AVCAGCTG	1	1
275	SF1(NR)/H295R-Nr5a1-ChIP-Seq(GSE44220)/Homer/CAAGGHCANV	1	1
276	Six1(Homeobox)/Myoblast-Six1-ChIP-Chip(GSE20150)/Homer/GKVTCADRTTWC	1	1
277	Six2(Homeobox)/NephronProgenitor-Six2-ChIP-Seq(GSE39837)/Homer/GWAAYHTGAKMC	1	1
278	Slug(Zf)/Mesoderm-Snai2-ChIP-Seq(GSE61475)/Homer/SNGCACCTGCHS	1	1
279	Smad2(MAD)/ES-SMAD2-ChIP-Seq(GSE29422)/Homer/CTGTCTGG	1	1
280	Smad3(MAD)/NPC-Smad3-ChIP-Seq(GSE36673)/Homer/TWGTCTGV	1	1
281	Smad4(MAD)/ESC-SMAD4-ChIP-Seq(GSE29422)/Homer/VBSYGTCTGG	1	1
282	Sox10(HMG)/SciaticNerve-Sox3-ChIP-Seq(GSE35132)/Homer/CCWTTGTYYB	1	1
283	Sox15(HMG)/CPA-Sox15-ChIP-Seq(GSE62909)/Homer/RAACAATGGN	1	1
284	Sox17(HMG)/Endoderm-Sox17-ChIP-Seq(GSE61475)/Homer/CCATTGTTYB	1	1
285	Sox2(HMG)/mES-Sox2-ChIP-Seq(GSE11431)/Homer/BCCATTGTTC	1	1
286	Sox3(HMG)/NPC-Sox3-ChIP-Seq(GSE33059)/Homer/CCWTTGTY	1	1
287	Sox4(HMG)/proB-Sox4-ChIP-Seq(GSE50066)/Homer/YCTTTGTTCC	1	1
288	Sox6(HMG)/Myotubes-Sox6-ChIP-Seq(GSE32627)/Homer/CCATTGTTNY	1	1
289	Sox9(HMG)/Limb-SOX9-ChIP-Seq(GSE73225)/Homer/AGGVNCCTTTGT	1	1
290	Sp1(Zf)/Promoter/Homer/GGCCCCGCCCCC	1	1
291	Sp5(Zf)/mES-Sp5.Flag-ChIP-Seq(GSE72989)/Homer/RGKGGGCGGAGC	1	1
292	SPDEF(ETS)/VCaP-SPDEF-ChIP-Seq(SRA014231)/Homer/ASWTCCTGBT	1	1
293	SpiB(ETS)/OCILY3-SPIB-ChIP-Seq(GSE56857)/Homer/AAAGRGGAAGTG	1	1
294	Srebp1a(bHLH)/HepG2-Srebp1a-ChIP-Seq(GSE31477)/Homer/RTCACSCCAY	1	1
295	Srebp2(bHLH)/HepG2-Srebp2-ChIP-Seq(GSE31477)/Homer/CGGTCACSCCAC	1	1
296	STAT1(Stat)/HelaS3-STAT1-ChIP-Seq(GSE12782)/Homer/NATTTCCNGGAAAT	1	1
297	Stat3+il21(Stat)/CD4-Stat3-ChIP-Seq(GSE19198)/Homer/SVYTTCCNGGAARB	1	1
298	Stat3(Stat)/mES-Stat3-ChIP-Seq(GSE11431)/Homer/CTTCCGGGAA	1	1
299	STAT4(Stat)/CD4-Stat4-ChIP-Seq(GSE22104)/Homer/NYTTCCWGGAAR	1	1
300	STAT5(Stat)/mCD4+-Stat5-ChIP-Seq(GSE12346)/Homer/RTTTCTNAGAAA	1	1
301	STAT6(Stat)/CD4-Stat6-ChIP-Seq(GSE22104)/Homer/ABTTCYYRRGAA	1	1
302	STAT6(Stat)/Macrophage-Stat6-ChIP-Seq(GSE38377)/Homer/TTCCKNAGAA	1	1
303	T1ISRE(IRF)/ThioMac-Ifnb-Expression/Homer/ACTTTCGTTTCT	1	1
304	TATA-Box(TBP)/Promoter/Homer/CCTTTTAWAGSC	1	1
305	Tbet(T-box)/CD8-Tbet-ChIP-Seq(GSE33802)/Homer/AGGTGTGAAM	1	1
306	Tbox:Smad(T-box,MAD)/ESCd5-Smad2_3-ChIP-Seq(GSE29422)/Homer/AGGTGHCAGACA	1	1
307	Tbr1(T-box)/Cortex-Tbr1-ChIP-Seq(GSE71384)/Homer/AAGGTGTKAA	1	1
308	Tbx20(T-box)/Heart-Tbx20-ChIP-Seq(GSE29636)/Homer/GGTGYTGACAGS	1	1
309	Tbx5(T-box)/HL1-Tbx5.biotin-ChIP-Seq(GSE21529)/Homer/AGGTGTCA	1	1
310	Tcf12(bHLH)/GM12878-Tcf12-ChIP-Seq(GSE32465)/Homer/VCAGCTGYTG	1	1
311	Tcf21(bHLH)/ArterySmoothMuscle-Tcf21-ChIP-Seq(GSE61369)/Homer/NAACAGCTGG	1	1
312	Tcf3(HMG)/mES-Tcf3-ChIP-Seq(GSE11724)/Homer/ASWTCAAAGG	1	1
313	Tcf4(HMG)/Hct116-Tcf4-ChIP-Seq(SRA012054)/Homer/ASATCAAAGGVA	1	1
314	Tcfcp2l1(CP2)/mES-Tcfcp2l1-ChIP-Seq(GSE11431)/Homer/NRAACCRGTTYRAACCRGYT	1	1
315	TCFL2(HMG)/K562-TCF7L2-ChIP-Seq(GSE29196)/Homer/ACWTCAAAGG	1	1
316	TEAD2(TEA)/Py2T-Tead2-ChIP-Seq(GSE55709)/Homer/CCWGGAATGY	1	1
317	TEAD4(TEA)/Tropoblast-Tead4-ChIP-Seq(GSE37350)/Homer/CCWGGAATGY	1	1
318	TEAD(TEA)/Fibroblast-PU.1-ChIP-Seq(Unpublished)/Homer/YCWGGAATGY	1	1
319	TFE3(bHLH)/MEF-TFE3-ChIP-Seq(GSE75757)/Homer/GTCACGTGACYV	1	1
320	Tgif1(Homeobox)/mES-Tgif1-ChIP-Seq(GSE55404)/Homer/YTGWCADY	1	1
321	Tgif2(Homeobox)/mES-Tgif2-ChIP-Seq(GSE55404)/Homer/TGTCANYT	1	1
322	THRa(NR)/C17.2-THRa-ChIP-Seq(GSE38347)/Homer/GGTCANYTGAGGWCA	1	1
323	THRb(NR)/Liver-NR1A2-ChIP-Seq(GSE52613)/Homer/TRAGGTCA	1	1
324	Tlx?(NR)/NPC-H3K4me1-ChIP-Seq(GSE16256)/Homer/CTGGCAGSCTGCCA	1	1
325	TR4(NR),DR1/Hela-TR4-ChIP-Seq(GSE24685)/Homer/GAGGTCAAAGGTCA	1	1
326	Twist(bHLH)/HMLE-TWIST1-ChIP-Seq(Chang_et_al)/Homer/VCAKCTGGNNNCCAGMTGBN	1	1
327	Unknown-ESC-element(?)/mES-Nanog-ChIP-Seq(GSE11724)/Homer/CACAGCAGGGGG	1	1
328	Unknown(Homeobox)/Limb-p300-ChIP-Seq/Homer/SSCMATWAAA	1	1
329	USF1(bHLH)/GM12878-Usf1-ChIP-Seq(GSE32465)/Homer/SGTCACGTGR	1	1
330	Usf2(bHLH)/C2C12-Usf2-ChIP-Seq(GSE36030)/Homer/GTCACGTGGT	1	1
331	VDR(NR),DR3/GM10855-VDR+vitD-ChIP-Seq(GSE22484)/Homer/ARAGGTCANWGAGTTCANNN	1	1
332	X-box(HTH)/NPC-H3K4me1-ChIP-Seq(GSE16256)/Homer/GGTTGCCATGGCAA	1	1
333	YY1(Zf)/Promoter/Homer/CAAGATGGCGGC	1	1
334	ZBTB12(Zf)/HEK293-ZBTB12.GFP-ChIP-Seq(GSE58341)/Homer/NGNTCTAGAACCNGV	1	1
335	ZBTB18(Zf)/HEK293-ZBTB18.GFP-ChIP-Seq(GSE58341)/Homer/AACATCTGGA	1	1
336	ZBTB33(Zf)/GM12878-ZBTB33-ChIP-Seq(GSE32465)/Homer/GGVTCTCGCGAGAAC	1	1
337	ZEB1(Zf)/PDAC-ZEB1-ChIP-Seq(GSE64557)/Homer/VCAGGTRDRY	1	1
338	Zfp281(Zf)/ES-Zfp281-ChIP-Seq(GSE81042)/Homer/CCCCTCCCCCAC	1	1
339	ZFP3(Zf)/HEK293-ZFP3.GFP-ChIP-Seq(GSE58341)/Homer/GGGTTTTGAAGGATGARTAGGAGTT	1	1
340	Zfp809(Zf)/ES-Zfp809-ChIP-Seq(GSE70799)/Homer/GGGGCTYGKCTGGGA	1	1
341	ZFX(Zf)/mES-Zfx-ChIP-Seq(GSE11431)/Homer/AGGCCTRG	1	1
342	Zic3(Zf)/mES-Zic3-ChIP-Seq(GSE37889)/Homer/GGCCYCCTGCTGDGH	1	1
343	Zic(Zf)/Cerebellum-ZIC1.2-ChIP-Seq(GSE60731)/Homer/CCTGCTGAGH	1	1
344	ZNF136(Zf)/HEK293-ZNF136.GFP-ChIP-Seq(GSE58341)/Homer/YTKGATAHAGTATTCTWGGTNGGCA	1	1
345	ZNF143|STAF(Zf)/CUTLL-ZNF143-ChIP-Seq(GSE29600)/Homer/ATTTCCCAGVAKSCY	1	1
346	ZNF165(Zf)/WHIM12-ZNF165-ChIP-Seq(GSE65937)/Homer/AAGGKGRCGCAGGCA	1	1
347	ZNF16(Zf)/HEK293-ZNF16.GFP-ChIP-Seq(GSE58341)/Homer/MACCTTCYATGGCTCCCTAKTGCCY	1	1
348	ZNF189(Zf)/HEK293-ZNF189.GFP-ChIP-Seq(GSE58341)/Homer/TGGAACAGMA	1	1
349	Znf263(Zf)/K562-Znf263-ChIP-Seq(GSE31477)/Homer/CVGTSCTCCC	1	1
350	ZNF264(Zf)/HEK293-ZNF264.GFP-ChIP-Seq(GSE58341)/Homer/RGGGCACTAACY	1	1
351	ZNF317(Zf)/HEK293-ZNF317.GFP-ChIP-Seq(GSE58341)/Homer/GTCWGCTGTYYCTCT	1	1
352	ZNF322(Zf)/HEK293-ZNF322.GFP-ChIP-Seq(GSE58341)/Homer/GAGCCTGGTACTGWGCCTGR	1	1
353	ZNF382(Zf)/HEK293-ZNF382.GFP-ChIP-Seq(GSE58341)/Homer/GNCTGTASTRNTGBCTCHTT	1	1
354	ZNF415(Zf)/HEK293-ZNF415.GFP-ChIP-Seq(GSE58341)/Homer/GRTGMTRGAGCC	1	1
355	ZNF416(Zf)/HEK293-ZNF416.GFP-ChIP-Seq(GSE58341)/Homer/WDNCTGGGCA	1	1
356	ZNF41(Zf)/HEK293-ZNF41.GFP-ChIP-Seq(GSE58341)/Homer/CCTCATGGTGYCYTWYTCCCTTGTG	1	1
357	ZNF467(Zf)/HEK293-ZNF467.GFP-ChIP-Seq(GSE58341)/Homer/TGGGGAAGGGCM	1	1
358	ZNF519(Zf)/HEK293-ZNF519.GFP-ChIP-Seq(GSE58341)/Homer/GAGSCCGAGC	1	1
359	ZNF528(Zf)/HEK293-ZNF528.GFP-ChIP-Seq(GSE58341)/Homer/AGAAATGACTTCCCT	1	1
360	ZNF669(Zf)/HEK293-ZNF669.GFP-ChIP-Seq(GSE58341)/Homer/GARTGGTCATCGCCC	1	1
361	ZNF675(Zf)/HEK293-ZNF675.GFP-ChIP-Seq(GSE58341)/Homer/ARGAGGMCAAAATGW	1	1
362	ZNF692(Zf)/HEK293-ZNF692.GFP-ChIP-Seq(GSE58341)/Homer/GTGGGCCCCA	1	1
363	ZNF711(Zf)/SHSY5Y-ZNF711-ChIP-Seq(GSE20673)/Homer/AGGCCTAG	1	1
364	ZSCAN22(Zf)/HEK293-ZSCAN22.GFP-ChIP-Seq(GSE58341)/Homer/SMCAGTCWGAKGGAGGAGGC	1	1

[truncated: 14 more sheets: 3y6_overlap_Motif, 3y7_overlap_Motif, 3y8_overlap_Motif, 4a6_overlap_Motif, 4a8_overlap_Motif, 4a10_overlap_Motif, 4a11_overlap_Motif, 4a12_overlap_Motif, 4y1_overlap_Motif, 4y2_overlap_Motif, 4y3_overlap_Motif, 4y5_overlap_Motif, 5y5_overlap_Motif, 5y6_overlap_Motif]
