# Supplementary material for: Aging alters the epigenetic asymmetry of HSC division
Source: PLoS Biol. 2018 Sep 20;16(9):e2003389. doi: 10.1371/journal.pbio.2003389 (PMC6168157; doi:10.1371/journal.pbio.2003389)
Supplement: S10 Table — (XLSX) [file pbio.2003389.s030.xlsx]

## Sheet: 3a1_overlap_GO
universe		A	B
1	R-MMU-1059683	0	1
2	R-MMU-109581	1	1
3	R-MMU-111446	1	0
4	R-MMU-111933	0	1
5	R-MMU-111996	0	1
6	R-MMU-111997	0	1
7	R-MMU-112399	0	1
8	R-MMU-112412	0	1
9	R-MMU-114508	0	1
10	R-MMU-1251985	0	1
11	R-MMU-1280218	0	1
12	R-MMU-139910	0	1
13	R-MMU-140342	0	1
14	R-MMU-1433557	0	1
15	R-MMU-1483196	1	0
16	R-MMU-1483255	0	1
17	R-MMU-1483257	0	1
18	R-MMU-1489509	0	1
19	R-MMU-1500931	1	1
20	R-MMU-1538133	0	1
21	R-MMU-157118	1	1
22	R-MMU-1640170	0	1
23	R-MMU-1655829	0	1
24	R-MMU-166016	0	1
25	R-MMU-1660516	0	1
26	R-MMU-166054	0	1
27	R-MMU-166058	0	1
28	R-MMU-166166	0	1
29	R-MMU-166187	1	0
30	R-MMU-166520	1	1
31	R-MMU-167021	0	1
32	R-MMU-167044	0	1
33	R-MMU-167826	1	0
34	R-MMU-167827	1	0
35	R-MMU-168138	0	1
36	R-MMU-168142	0	1
37	R-MMU-168164	0	1
38	R-MMU-168176	0	1
39	R-MMU-168179	0	1
40	R-MMU-168181	0	1
41	R-MMU-168188	0	1
42	R-MMU-168249	1	0
43	R-MMU-168256	1	1
44	R-MMU-169893	0	1
45	R-MMU-170834	1	1
46	R-MMU-170968	0	1
47	R-MMU-170984	0	1
48	R-MMU-173599	1	0
49	R-MMU-174362	0	1
50	R-MMU-177929	0	1
51	R-MMU-179812	0	1
52	R-MMU-180292	0	1
53	R-MMU-180336	0	1
54	R-MMU-181438	0	1
55	R-MMU-186763	0	1
56	R-MMU-186797	0	1
57	R-MMU-187037	0	1
58	R-MMU-187687	0	1
59	R-MMU-187706	0	1
60	R-MMU-191273	1	0
61	R-MMU-191647	0	1
62	R-MMU-191650	0	1
63	R-MMU-193692	1	1
64	R-MMU-193704	1	1
65	R-MMU-194138	1	1
66	R-MMU-194315	1	1
67	R-MMU-195258	1	1
68	R-MMU-195721	1	1
69	R-MMU-196299	1	0
70	R-MMU-196836	1	0
71	R-MMU-1980143	0	1
72	R-MMU-1980145	1	0
73	R-MMU-1980148	0	1
74	R-MMU-199920	0	1
75	R-MMU-199977	1	1
76	R-MMU-199991	1	1
77	R-MMU-201451	0	1
78	R-MMU-201681	1	0
79	R-MMU-2029480	0	1
80	R-MMU-2029482	0	1
81	R-MMU-204005	0	1
82	R-MMU-2046104	0	1
83	R-MMU-2046105	0	1
84	R-MMU-2046106	0	1
85	R-MMU-204998	1	1
86	R-MMU-205043	1	1
87	R-MMU-210744	1	0
88	R-MMU-211227	0	1
89	R-MMU-2122948	0	1
90	R-MMU-212436	0	1
91	R-MMU-212718	0	1
92	R-MMU-2172127	0	1
93	R-MMU-2173788	1	1
94	R-MMU-2173789	1	1
95	R-MMU-2173793	0	1
96	R-MMU-2173796	1	1
97	R-MMU-2197563	1	0
98	R-MMU-2404192	0	1
99	R-MMU-2424491	0	1
100	R-MMU-2426168	0	1
101	R-MMU-2428924	0	1
102	R-MMU-2428928	0	1
103	R-MMU-2454202	0	1
104	R-MMU-2467813	0	1
105	R-MMU-2500257	0	1
106	R-MMU-2555396	0	1
107	R-MMU-2586552	0	1
108	R-MMU-2682334	1	1
109	R-MMU-2730905	0	1
110	R-MMU-2871796	0	1
111	R-MMU-2871809	0	1
112	R-MMU-3000157	1	0
113	R-MMU-3000170	1	0
114	R-MMU-3000171	1	0
115	R-MMU-3065676	0	1
116	R-MMU-3247509	1	0
117	R-MMU-3371511	1	0
118	R-MMU-373752	0	1
119	R-MMU-373755	0	1
120	R-MMU-373760	0	1
121	R-MMU-375165	0	1
122	R-MMU-383280	0	1
123	R-MMU-3858494	0	1
124	R-MMU-389356	0	1
125	R-MMU-392499	0	1
126	R-MMU-3928662	0	1
127	R-MMU-3928663	0	1
128	R-MMU-3928665	0	1
129	R-MMU-399710	1	0
130	R-MMU-399955	0	1
131	R-MMU-400685	0	1
132	R-MMU-4086398	0	1
133	R-MMU-416482	0	1
134	R-MMU-416572	0	1
135	R-MMU-416993	1	0
136	R-MMU-418038	1	0
137	R-MMU-418346	0	1
138	R-MMU-418359	0	1
139	R-MMU-418360	0	1
140	R-MMU-418597	0	1
141	R-MMU-418885	0	1
142	R-MMU-418889	0	1
143	R-MMU-418990	0	1
144	R-MMU-421270	0	1
145	R-MMU-422475	1	1
146	R-MMU-425561	0	1
147	R-MMU-427601	0	1
148	R-MMU-433692	0	1
149	R-MMU-438064	0	1
150	R-MMU-4420097	1	1
151	R-MMU-442717	0	1
152	R-MMU-442729	0	1
153	R-MMU-442742	0	1
154	R-MMU-442755	0	1
155	R-MMU-444257	0	1
156	R-MMU-445095	1	0
157	R-MMU-445355	0	1
158	R-MMU-446199	0	1
159	R-MMU-446203	1	1
160	R-MMU-446652	0	1
161	R-MMU-446728	0	1
162	R-MMU-449147	0	1
163	R-MMU-450282	0	1
164	R-MMU-450294	0	1
165	R-MMU-451927	0	1
166	R-MMU-453279	0	1
167	R-MMU-4641262	1	0
168	R-MMU-4641265	0	1
169	R-MMU-4839726	1	0
170	R-MMU-5099900	1	0
171	R-MMU-512988	0	1
172	R-MMU-5140745	1	0
173	R-MMU-5218920	0	1
174	R-MMU-5218921	0	1
175	R-MMU-532668	0	1
176	R-MMU-535734	0	1
177	R-MMU-5357801	0	1
178	R-MMU-556833	0	1
179	R-MMU-5607763	0	1
180	R-MMU-5607764	0	1
181	R-MMU-5617833	1	0
182	R-MMU-5620920	1	0
183	R-MMU-5621481	0	1
184	R-MMU-5626467	0	1
185	R-MMU-5626978	0	1
186	R-MMU-5627123	0	1
187	R-MMU-5633008	1	0
188	R-MMU-5653656	1	1
189	R-MMU-5663220	0	1
190	R-MMU-5673001	0	1
191	R-MMU-5683057	0	1
192	R-MMU-5684996	0	1
193	R-MMU-5696398	0	1
194	R-MMU-5696399	0	1
195	R-MMU-597592	0	1
196	R-MMU-6781827	0	1
197	R-MMU-6794361	0	1
198	R-MMU-6794362	0	1
199	R-MMU-6807004	0	1
200	R-MMU-6807878	0	1
201	R-MMU-68874	0	1
202	R-MMU-68877	0	1
203	R-MMU-68882	0	1
204	R-MMU-68884	0	1
205	R-MMU-68886	0	1
206	R-MMU-68962	0	1
207	R-MMU-69002	0	1
208	R-MMU-69206	0	1
209	R-MMU-69231	1	1
210	R-MMU-69236	1	1
211	R-MMU-69242	0	1
212	R-MMU-69273	0	1
213	R-MMU-69278	0	1
214	R-MMU-69306	0	1
215	R-MMU-70326	0	1
216	R-MMU-71032	0	1
217	R-MMU-72613	1	0
218	R-MMU-72731	1	0
219	R-MMU-72737	1	0
220	R-MMU-72766	1	0
221	R-MMU-74751	0	1
222	R-MMU-74752	0	1
223	R-MMU-75105	1	0
224	R-MMU-75153	1	0
225	R-MMU-75893	0	1
226	R-MMU-76002	0	1
227	R-MMU-77289	0	1
228	R-MMU-877300	0	1
229	R-MMU-877312	0	1
230	R-MMU-881907	0	1
231	R-MMU-8848021	1	1
232	R-MMU-8849471	1	1
233	R-MMU-8849932	0	1
234	R-MMU-8853659	0	1
235	R-MMU-8856688	0	1
236	R-MMU-8856828	0	1
237	R-MMU-8873719	0	1
238	R-MMU-8876725	0	1
239	R-MMU-901032	0	1
240	R-MMU-901042	0	1
241	R-MMU-912526	0	1
242	R-MMU-912631	0	1
243	R-MMU-913531	0	1
244	R-MMU-917977	1	0
245	R-MMU-937061	0	1
246	R-MMU-948021	1	1
247	R-MMU-975138	0	1
248	R-MMU-975155	0	1
249	R-MMU-975576	1	0
250	R-MMU-975577	1	0
251	R-MMU-975871	0	1
252	R-MMU-983695	0	1

## Sheet: 3a2_overlap_GO
universe		A	B
1	R-MMU-109581	0	1
2	R-MMU-109582	0	1
3	R-MMU-111453	1	0
4	R-MMU-111885	1	1
5	R-MMU-111931	0	1
6	R-MMU-111932	1	0
7	R-MMU-111933	1	0
8	R-MMU-111996	1	0
9	R-MMU-111997	1	0
10	R-MMU-112040	1	0
11	R-MMU-112043	1	1
12	R-MMU-112399	1	0
13	R-MMU-112412	1	0
14	R-MMU-114452	1	0
15	R-MMU-114508	1	1
16	R-MMU-114604	0	1
17	R-MMU-1168372	1	0
18	R-MMU-1169091	1	0
19	R-MMU-1227986	0	1
20	R-MMU-1236394	0	1
21	R-MMU-1251985	0	1
22	R-MMU-1257604	0	1
23	R-MMU-1280218	1	1
24	R-MMU-1368110	1	0
25	R-MMU-139910	1	0
26	R-MMU-140179	0	1
27	R-MMU-140342	0	1
28	R-MMU-1433557	1	1
29	R-MMU-1433559	0	1
30	R-MMU-1445148	1	0
31	R-MMU-1483249	1	0
32	R-MMU-1483255	1	0
33	R-MMU-1489509	1	0
34	R-MMU-1500931	1	1
35	R-MMU-157118	0	1
36	R-MMU-159236	0	1
37	R-MMU-1614635	1	0
38	R-MMU-163615	0	1
39	R-MMU-1640170	1	1
40	R-MMU-164378	0	1
41	R-MMU-165158	1	0
42	R-MMU-1655829	1	1
43	R-MMU-166016	1	1
44	R-MMU-1660499	1	0
45	R-MMU-166054	1	1
46	R-MMU-166058	1	1
47	R-MMU-166166	1	1
48	R-MMU-166520	1	1
49	R-MMU-167021	1	0
50	R-MMU-167044	1	0
51	R-MMU-168138	1	1
52	R-MMU-168142	1	1
53	R-MMU-168164	1	1
54	R-MMU-168176	1	1
55	R-MMU-168179	1	1
56	R-MMU-168181	1	1
57	R-MMU-168188	1	1
58	R-MMU-168256	1	1
59	R-MMU-168643	1	0
60	R-MMU-168898	1	0
61	R-MMU-169893	1	0
62	R-MMU-170822	0	1
63	R-MMU-170834	1	1
64	R-MMU-170968	1	0
65	R-MMU-170984	1	0
66	R-MMU-174113	1	0
67	R-MMU-174430	1	0
68	R-MMU-177929	1	1
69	R-MMU-179812	1	0
70	R-MMU-1799339	0	1
71	R-MMU-180292	0	1
72	R-MMU-180336	1	0
73	R-MMU-181438	1	1
74	R-MMU-1855191	1	0
75	R-MMU-1855204	1	0
76	R-MMU-186763	1	1
77	R-MMU-186797	1	1
78	R-MMU-187037	1	1
79	R-MMU-187577	1	0
80	R-MMU-187687	1	1
81	R-MMU-187706	1	0
82	R-MMU-190872	1	0
83	R-MMU-191273	1	1
84	R-MMU-193648	0	1
85	R-MMU-193692	0	1
86	R-MMU-193704	1	1
87	R-MMU-194138	1	1
88	R-MMU-194315	1	1
89	R-MMU-194840	1	1
90	R-MMU-195253	1	0
91	R-MMU-195258	1	1
92	R-MMU-195721	1	0
93	R-MMU-196783	0	1
94	R-MMU-196836	1	0
95	R-MMU-1980143	0	1
96	R-MMU-1980148	0	1
97	R-MMU-1980150	0	1
98	R-MMU-198203	0	1
99	R-MMU-198725	1	0
100	R-MMU-198753	1	0
101	R-MMU-199920	1	0
102	R-MMU-199977	1	0
103	R-MMU-199991	1	1
104	R-MMU-201451	1	0
105	R-MMU-2022928	1	0
106	R-MMU-202403	1	0
107	R-MMU-202424	1	0
108	R-MMU-202670	1	0
109	R-MMU-203615	1	0
110	R-MMU-204005	1	0
111	R-MMU-204174	1	0
112	R-MMU-2046104	1	0
113	R-MMU-2046105	1	0
114	R-MMU-2046106	1	0
115	R-MMU-204998	1	1
116	R-MMU-205043	0	1
117	R-MMU-211227	0	1
118	R-MMU-2122947	0	1
119	R-MMU-2122948	0	1
120	R-MMU-212436	1	0
121	R-MMU-212718	1	0
122	R-MMU-2132295	1	0
123	R-MMU-2172127	1	1
124	R-MMU-2173788	1	1
125	R-MMU-2173789	1	1
126	R-MMU-2173793	0	1
127	R-MMU-2173796	0	1
128	R-MMU-2197563	1	0
129	R-MMU-2262752	1	1
130	R-MMU-2404192	1	0
131	R-MMU-2424491	1	1
132	R-MMU-2426168	0	1
133	R-MMU-2428924	1	0
134	R-MMU-2428928	1	0
135	R-MMU-2428933	0	1
136	R-MMU-2454202	1	1
137	R-MMU-2467813	1	1
138	R-MMU-2468052	0	1
139	R-MMU-2470946	0	1
140	R-MMU-2500257	1	1
141	R-MMU-2555396	1	1
142	R-MMU-2559580	1	0
143	R-MMU-2559583	1	1
144	R-MMU-2559585	1	1
145	R-MMU-2586552	1	0
146	R-MMU-2682334	1	1
147	R-MMU-2730905	0	1
148	R-MMU-2871796	1	0
149	R-MMU-2871809	1	1
150	R-MMU-2871837	1	0
151	R-MMU-2980766	1	1
152	R-MMU-2990846	1	1
153	R-MMU-3000170	0	1
154	R-MMU-3108214	1	1
155	R-MMU-3108232	1	1
156	R-MMU-3247509	1	0
157	R-MMU-3301854	1	1
158	R-MMU-3371556	1	0
159	R-MMU-3371568	1	0
160	R-MMU-3371571	1	0
161	R-MMU-350054	0	1
162	R-MMU-373760	0	1
163	R-MMU-375165	1	0
164	R-MMU-3769402	1	0
165	R-MMU-380615	0	1
166	R-MMU-383280	1	0
167	R-MMU-3858494	1	0
168	R-MMU-388841	0	1
169	R-MMU-389356	0	1
170	R-MMU-389357	1	1
171	R-MMU-392451	0	1
172	R-MMU-392499	1	1
173	R-MMU-392517	1	0
174	R-MMU-392518	0	1
175	R-MMU-392851	0	1
176	R-MMU-3928663	0	1
177	R-MMU-3928665	0	1
178	R-MMU-397795	0	1
179	R-MMU-400253	1	0
180	R-MMU-400685	1	1
181	R-MMU-4086398	1	0
182	R-MMU-4086400	1	0
183	R-MMU-416482	1	1
184	R-MMU-416550	0	1
185	R-MMU-416572	1	0
186	R-MMU-418346	1	1
187	R-MMU-418359	1	0
188	R-MMU-418360	1	0
189	R-MMU-418592	0	1
190	R-MMU-418990	0	1
191	R-MMU-420597	0	1
192	R-MMU-421270	0	1
193	R-MMU-422475	1	1
194	R-MMU-425561	1	0
195	R-MMU-426496	1	0
196	R-MMU-432142	0	1
197	R-MMU-438064	1	0
198	R-MMU-4419969	1	1
199	R-MMU-4420097	1	1
200	R-MMU-442717	1	0
201	R-MMU-442745	1	0
202	R-MMU-442755	1	0
203	R-MMU-445095	0	1
204	R-MMU-445989	0	1
205	R-MMU-446203	1	1
206	R-MMU-446353	1	0
207	R-MMU-446652	1	0
208	R-MMU-446728	1	0
209	R-MMU-449147	1	0
210	R-MMU-450282	1	1
211	R-MMU-450294	1	1
212	R-MMU-450321	1	0
213	R-MMU-450341	0	1
214	R-MMU-450520	1	0
215	R-MMU-450531	1	0
216	R-MMU-451306	1	1
217	R-MMU-451308	1	1
218	R-MMU-451326	1	0
219	R-MMU-451927	1	1
220	R-MMU-453274	1	0
221	R-MMU-453279	1	1
222	R-MMU-4570464	1	1
223	R-MMU-4615885	0	1
224	R-MMU-4641257	1	0
225	R-MMU-4641265	1	0
226	R-MMU-4839726	1	0
227	R-MMU-508751	1	0
228	R-MMU-512988	1	1
229	R-MMU-5205647	0	1
230	R-MMU-5205685	0	1
231	R-MMU-5218920	1	0
232	R-MMU-5218921	1	0
233	R-MMU-532668	1	1
234	R-MMU-535734	1	1
235	R-MMU-5357801	0	1
236	R-MMU-5357905	0	1
237	R-MMU-5357956	0	1
238	R-MMU-5358346	1	0
239	R-MMU-5358351	1	0
240	R-MMU-556833	1	0
241	R-MMU-5607763	1	1
242	R-MMU-5607764	1	0
243	R-MMU-5610780	1	0
244	R-MMU-5610785	1	0
245	R-MMU-5610787	1	0
246	R-MMU-5621481	1	0
247	R-MMU-5625900	0	1
248	R-MMU-5626467	1	0
249	R-MMU-5627123	1	1
250	R-MMU-5633007	1	0
251	R-MMU-5653656	1	1
252	R-MMU-5658442	1	0
253	R-MMU-5663220	1	1
254	R-MMU-5673001	1	0
255	R-MMU-5683057	1	0
256	R-MMU-5684996	1	0
257	R-MMU-5687128	1	0
258	R-MMU-5688426	1	0
259	R-MMU-5689880	1	0
260	R-MMU-5694530	1	0
261	R-MMU-5696395	0	1
262	R-MMU-597592	1	1
263	R-MMU-622312	1	0
264	R-MMU-6794361	0	1
265	R-MMU-6794362	0	1
266	R-MMU-6804758	1	0
267	R-MMU-6806834	1	0
268	R-MMU-6807878	1	0
269	R-MMU-6811436	1	0
270	R-MMU-6811442	1	0
271	R-MMU-6811555	1	0
272	R-MMU-6814848	1	0
273	R-MMU-68874	1	0
274	R-MMU-68875	1	1
275	R-MMU-68877	1	1
276	R-MMU-68882	1	1
277	R-MMU-68884	0	1
278	R-MMU-68886	1	1
279	R-MMU-68952	1	0
280	R-MMU-69002	1	0
281	R-MMU-69202	1	0
282	R-MMU-69206	1	0
283	R-MMU-69229	1	0
284	R-MMU-69231	1	1
285	R-MMU-69236	1	1
286	R-MMU-69239	1	0
287	R-MMU-69242	1	0
288	R-MMU-69273	1	0
289	R-MMU-69275	1	0
290	R-MMU-69278	1	1
291	R-MMU-69300	1	0
292	R-MMU-69656	1	0
293	R-MMU-71032	1	1
294	R-MMU-71406	1	0
295	R-MMU-72202	0	1
296	R-MMU-72613	0	1
297	R-MMU-72695	0	1
298	R-MMU-72702	0	1
299	R-MMU-72706	0	1
300	R-MMU-72737	0	1
301	R-MMU-72766	0	1
302	R-MMU-727802	1	0
303	R-MMU-73887	0	1
304	R-MMU-73942	1	0
305	R-MMU-73943	1	0
306	R-MMU-74160	1	0
307	R-MMU-74751	1	0
308	R-MMU-75109	1	1
309	R-MMU-75815	1	0
310	R-MMU-75893	0	1
311	R-MMU-75896	1	0
312	R-MMU-76002	1	1
313	R-MMU-77289	1	1
314	R-MMU-877300	1	1
315	R-MMU-877312	1	1
316	R-MMU-881907	1	1
317	R-MMU-8847453	1	0
318	R-MMU-8848021	1	1
319	R-MMU-8849471	1	0
320	R-MMU-8851907	0	1
321	R-MMU-8852135	0	1
322	R-MMU-8852276	1	0
323	R-MMU-8853659	1	0
324	R-MMU-8854050	1	0
325	R-MMU-8856688	1	0
326	R-MMU-8866427	0	1
327	R-MMU-8873719	1	1
328	R-MMU-8876198	1	0
329	R-MMU-8876725	1	0
330	R-MMU-901032	1	1
331	R-MMU-901042	1	1
332	R-MMU-912526	1	0
333	R-MMU-912631	1	1
334	R-MMU-933542	0	1
335	R-MMU-937039	0	1
336	R-MMU-937061	1	1
337	R-MMU-948021	1	1
338	R-MMU-975138	1	1
339	R-MMU-975144	0	1
340	R-MMU-975155	1	1
341	R-MMU-975871	1	1
342	R-MMU-983168	1	0
343	R-MMU-983169	1	0
344	R-MMU-983695	0	1
345	R-MMU-983705	1	1

## Sheet: 3a3_overlap_GO
universe		A	B
1	R-MMU-109581	1	0
2	R-MMU-109582	1	0
3	R-MMU-111932	1	0
4	R-MMU-111957	1	0
5	R-MMU-111995	0	1
6	R-MMU-112311	0	1
7	R-MMU-112316	0	1
8	R-MMU-114508	1	0
9	R-MMU-1295596	0	1
10	R-MMU-140342	1	0
11	R-MMU-1483249	1	0
12	R-MMU-1483255	1	0
13	R-MMU-1500931	1	0
14	R-MMU-157579	1	0
15	R-MMU-1614603	0	1
16	R-MMU-1640170	1	1
17	R-MMU-1655829	1	0
18	R-MMU-166016	1	1
19	R-MMU-1660499	1	0
20	R-MMU-1660516	1	0
21	R-MMU-166054	0	1
22	R-MMU-166058	0	1
23	R-MMU-166166	0	1
24	R-MMU-166520	1	0
25	R-MMU-168138	0	1
26	R-MMU-168142	0	1
27	R-MMU-168164	0	1
28	R-MMU-168176	0	1
29	R-MMU-168179	0	1
30	R-MMU-168181	0	1
31	R-MMU-168188	0	1
32	R-MMU-168256	1	0
33	R-MMU-168898	0	1
34	R-MMU-171052	0	1
35	R-MMU-174430	1	0
36	R-MMU-180024	0	1
37	R-MMU-180786	1	0
38	R-MMU-181438	0	1
39	R-MMU-1855204	1	0
40	R-MMU-1912422	0	1
41	R-MMU-191273	1	0
42	R-MMU-193648	1	0
43	R-MMU-193704	1	0
44	R-MMU-194315	1	1
45	R-MMU-195721	0	1
46	R-MMU-196780	1	0
47	R-MMU-198753	0	1
48	R-MMU-199977	1	0
49	R-MMU-199991	1	0
50	R-MMU-202131	1	0
51	R-MMU-2022928	1	0
52	R-MMU-202670	0	1
53	R-MMU-2029480	1	0
54	R-MMU-203615	1	0
55	R-MMU-203641	1	0
56	R-MMU-203765	1	0
57	R-MMU-204005	1	0
58	R-MMU-204174	1	0
59	R-MMU-2046104	1	0
60	R-MMU-2046106	1	0
61	R-MMU-204998	1	0
62	R-MMU-211227	1	0
63	R-MMU-2426168	1	0
64	R-MMU-2454202	1	0
65	R-MMU-2500257	0	1
66	R-MMU-2559580	1	0
67	R-MMU-2559585	0	1
68	R-MMU-2682334	1	1
69	R-MMU-2871809	1	0
70	R-MMU-2990846	1	0
71	R-MMU-3108214	1	0
72	R-MMU-3108232	1	0
73	R-MMU-380612	0	1
74	R-MMU-3858494	1	0
75	R-MMU-392499	1	0
76	R-MMU-392518	1	0
77	R-MMU-3928663	1	1
78	R-MMU-3928665	0	1
79	R-MMU-4086398	1	0
80	R-MMU-416482	1	0
81	R-MMU-418346	1	0
82	R-MMU-418359	1	0
83	R-MMU-418592	1	0
84	R-MMU-420597	1	0
85	R-MMU-422475	1	0
86	R-MMU-425393	1	0
87	R-MMU-425407	1	0
88	R-MMU-425561	1	0
89	R-MMU-428930	1	0
90	R-MMU-432030	1	0
91	R-MMU-432142	1	0
92	R-MMU-432720	1	0
93	R-MMU-437239	0	1
94	R-MMU-442717	1	0
95	R-MMU-442745	1	0
96	R-MMU-445144	0	1
97	R-MMU-446193	1	0
98	R-MMU-446199	1	0
99	R-MMU-446203	1	0
100	R-MMU-446219	1	0
101	R-MMU-446343	0	1
102	R-MMU-450282	0	1
103	R-MMU-450294	0	1
104	R-MMU-450341	0	1
105	R-MMU-451306	1	0
106	R-MMU-451308	1	0
107	R-MMU-451326	1	0
108	R-MMU-453274	1	0
109	R-MMU-453279	1	0
110	R-MMU-535734	0	1
111	R-MMU-5357801	1	0
112	R-MMU-5357905	1	0
113	R-MMU-5607763	1	0
114	R-MMU-5607764	1	0
115	R-MMU-5617833	1	0
116	R-MMU-5620912	1	0
117	R-MMU-5621481	1	0
118	R-MMU-5624138	1	0
119	R-MMU-5626467	1	0
120	R-MMU-5626978	1	0
121	R-MMU-5627117	1	0
122	R-MMU-5627123	1	0
123	R-MMU-5653656	1	0
124	R-MMU-5654736	0	1
125	R-MMU-5663220	0	1
126	R-MMU-5688426	1	0
127	R-MMU-5696394	1	0
128	R-MMU-597592	1	0
129	R-MMU-6794362	1	0
130	R-MMU-6798163	1	0
131	R-MMU-6803211	0	1
132	R-MMU-6804758	1	0
133	R-MMU-68877	0	1
134	R-MMU-68886	0	1
135	R-MMU-68952	1	0
136	R-MMU-68962	1	0
137	R-MMU-69206	1	0
138	R-MMU-69242	1	0
139	R-MMU-69275	1	0
140	R-MMU-69278	1	1
141	R-MMU-69306	1	0
142	R-MMU-70171	0	1
143	R-MMU-70221	1	0
144	R-MMU-70263	0	1
145	R-MMU-70326	1	0
146	R-MMU-71032	1	0
147	R-MMU-71387	1	0
148	R-MMU-71403	0	1
149	R-MMU-73762	0	1
150	R-MMU-73817	0	1
151	R-MMU-73887	1	0
152	R-MMU-73942	1	0
153	R-MMU-73943	1	0
154	R-MMU-75153	1	0
155	R-MMU-75893	1	0
156	R-MMU-76002	1	0
157	R-MMU-8849932	1	0
158	R-MMU-8854214	1	0
159	R-MMU-8866427	0	1
160	R-MMU-8876725	1	0
161	R-MMU-937061	0	1
162	R-MMU-948021	1	0
163	R-MMU-975138	0	1
164	R-MMU-975155	0	1
165	R-MMU-975871	0	1

## Sheet: 3a4_overlap_GO
universe		A	B
1	R-MMU-1059683	1	0
2	R-MMU-109581	1	1
3	R-MMU-109582	1	0
4	R-MMU-109606	0	1
5	R-MMU-110312	0	1
6	R-MMU-110314	0	1
7	R-MMU-111446	0	1
8	R-MMU-111453	0	1
9	R-MMU-111885	1	0
10	R-MMU-111933	1	0
11	R-MMU-111996	1	0
12	R-MMU-111997	1	0
13	R-MMU-112040	1	0
14	R-MMU-112043	1	0
15	R-MMU-112311	0	1
16	R-MMU-112314	1	0
17	R-MMU-112315	1	0
18	R-MMU-112316	1	0
19	R-MMU-114452	0	1
20	R-MMU-114508	1	1
21	R-MMU-1169408	1	0
22	R-MMU-1169410	1	0
23	R-MMU-1227986	0	1
24	R-MMU-1237112	1	0
25	R-MMU-1251985	1	0
26	R-MMU-1253288	0	1
27	R-MMU-1295596	0	1
28	R-MMU-1296071	1	0
29	R-MMU-1358803	0	1
30	R-MMU-140179	1	0
31	R-MMU-140342	1	0
32	R-MMU-1433557	1	0
33	R-MMU-1433559	1	0
34	R-MMU-1445148	0	1
35	R-MMU-1474290	1	0
36	R-MMU-1483249	0	1
37	R-MMU-1483255	1	0
38	R-MMU-1483257	1	0
39	R-MMU-1489509	1	0
40	R-MMU-1500931	1	1
41	R-MMU-1538133	1	0
42	R-MMU-1614558	0	1
43	R-MMU-163359	1	0
44	R-MMU-163560	1	0
45	R-MMU-1640170	1	1
46	R-MMU-1650814	1	0
47	R-MMU-1655829	1	0
48	R-MMU-166016	1	0
49	R-MMU-1660514	1	0
50	R-MMU-1660517	1	0
51	R-MMU-166054	1	0
52	R-MMU-166058	1	0
53	R-MMU-166166	1	0
54	R-MMU-166520	1	0
55	R-MMU-167021	1	0
56	R-MMU-168138	1	0
57	R-MMU-168142	1	0
58	R-MMU-168164	1	0
59	R-MMU-168176	1	0
60	R-MMU-168179	1	0
61	R-MMU-168181	1	0
62	R-MMU-168188	1	0
63	R-MMU-168643	1	0
64	R-MMU-168928	0	1
65	R-MMU-170822	1	0
66	R-MMU-170834	1	0
67	R-MMU-171052	1	0
68	R-MMU-174362	0	1
69	R-MMU-174430	1	0
70	R-MMU-177929	1	0
71	R-MMU-181438	1	0
72	R-MMU-182971	1	0
73	R-MMU-1855183	0	1
74	R-MMU-186763	1	0
75	R-MMU-186797	1	0
76	R-MMU-187037	1	0
77	R-MMU-191273	1	1
78	R-MMU-191859	1	0
79	R-MMU-193648	1	0
80	R-MMU-193704	1	0
81	R-MMU-194138	1	0
82	R-MMU-194315	1	1
83	R-MMU-194441	1	0
84	R-MMU-194840	1	1
85	R-MMU-195253	1	0
86	R-MMU-195258	1	0
87	R-MMU-199977	1	0
88	R-MMU-199991	1	1
89	R-MMU-199992	1	0
90	R-MMU-2022928	1	0
91	R-MMU-2032785	0	1
92	R-MMU-204005	1	0
93	R-MMU-204998	1	0
94	R-MMU-205043	0	1
95	R-MMU-211227	1	0
96	R-MMU-212436	1	1
97	R-MMU-212718	1	0
98	R-MMU-2172127	1	0
99	R-MMU-2173788	1	1
100	R-MMU-2173789	1	1
101	R-MMU-2173793	1	0
102	R-MMU-2173796	1	1
103	R-MMU-2424491	1	0
104	R-MMU-2426168	1	0
105	R-MMU-2454202	1	0
106	R-MMU-2467813	1	0
107	R-MMU-2470946	1	0
108	R-MMU-2500257	1	0
109	R-MMU-2555396	1	0
110	R-MMU-2559583	0	1
111	R-MMU-2559585	0	1
112	R-MMU-2565942	0	1
113	R-MMU-264870	1	0
114	R-MMU-2682334	1	0
115	R-MMU-2871809	1	0
116	R-MMU-2980766	1	0
117	R-MMU-2990846	1	0
118	R-MMU-2995383	1	0
119	R-MMU-2995410	1	0
120	R-MMU-3108214	1	0
121	R-MMU-3108232	1	0
122	R-MMU-3295583	1	0
123	R-MMU-3301854	1	0
124	R-MMU-3371556	1	0
125	R-MMU-3371571	1	0
126	R-MMU-3700989	0	1
127	R-MMU-373755	1	0
128	R-MMU-380615	0	1
129	R-MMU-381340	0	1
130	R-MMU-383280	1	1
131	R-MMU-389359	1	0
132	R-MMU-392499	1	0
133	R-MMU-392517	1	0
134	R-MMU-3928663	1	0
135	R-MMU-3928665	1	0
136	R-MMU-397014	1	0
137	R-MMU-399710	1	0
138	R-MMU-399719	1	0
139	R-MMU-399721	1	0
140	R-MMU-400253	0	1
141	R-MMU-400685	1	0
142	R-MMU-4085001	1	0
143	R-MMU-416482	1	0
144	R-MMU-416993	1	0
145	R-MMU-418346	1	0
146	R-MMU-418592	1	0
147	R-MMU-418889	1	0
148	R-MMU-418990	1	1
149	R-MMU-420029	1	0
150	R-MMU-420597	1	0
151	R-MMU-421270	1	0
152	R-MMU-421837	1	0
153	R-MMU-422475	1	0
154	R-MMU-425381	0	1
155	R-MMU-432142	1	0
156	R-MMU-432722	1	0
157	R-MMU-438064	1	0
158	R-MMU-438066	1	0
159	R-MMU-4420097	1	0
160	R-MMU-442533	0	1
161	R-MMU-442717	1	0
162	R-MMU-442720	1	0
163	R-MMU-442729	0	1
164	R-MMU-442755	1	0
165	R-MMU-446193	1	0
166	R-MMU-446203	1	1
167	R-MMU-446219	1	0
168	R-MMU-446353	0	1
169	R-MMU-446728	1	1
170	R-MMU-450294	1	0
171	R-MMU-450302	1	0
172	R-MMU-450321	1	0
173	R-MMU-450385	0	1
174	R-MMU-450531	0	1
175	R-MMU-450604	0	1
176	R-MMU-451326	0	1
177	R-MMU-453274	1	1
178	R-MMU-453279	1	1
179	R-MMU-4570464	1	0
180	R-MMU-4641263	0	1
181	R-MMU-4641265	1	0
182	R-MMU-499943	0	1
183	R-MMU-508751	0	1
184	R-MMU-5205647	0	1
185	R-MMU-5205685	0	1
186	R-MMU-5218920	1	0
187	R-MMU-532668	0	1
188	R-MMU-5334727	0	1
189	R-MMU-5357786	1	0
190	R-MMU-5357801	1	1
191	R-MMU-5576891	1	0
192	R-MMU-5578775	1	0
193	R-MMU-5607763	1	0
194	R-MMU-5607764	1	0
195	R-MMU-5610787	1	0
196	R-MMU-5621481	1	0
197	R-MMU-5625900	1	0
198	R-MMU-5626978	1	0
199	R-MMU-5627123	1	0
200	R-MMU-5628897	0	1
201	R-MMU-5633007	0	1
202	R-MMU-5653656	1	1
203	R-MMU-5654732	0	1
204	R-MMU-5655862	0	1
205	R-MMU-5656121	0	1
206	R-MMU-5663220	1	0
207	R-MMU-5683057	1	0
208	R-MMU-5687128	1	0
209	R-MMU-5689877	0	1
210	R-MMU-5689880	1	0
211	R-MMU-5696397	0	1
212	R-MMU-597592	1	0
213	R-MMU-622312	1	0
214	R-MMU-6794361	1	0
215	R-MMU-6794362	1	0
216	R-MMU-6804758	1	1
217	R-MMU-6804760	0	1
218	R-MMU-6806834	0	1
219	R-MMU-6807004	1	0
220	R-MMU-6807047	0	1
221	R-MMU-6807062	0	1
222	R-MMU-6811440	1	0
223	R-MMU-6811555	0	1
224	R-MMU-68874	1	1
225	R-MMU-68875	1	0
226	R-MMU-68877	1	0
227	R-MMU-68882	1	0
228	R-MMU-68886	1	0
229	R-MMU-68952	1	0
230	R-MMU-68962	1	1
231	R-MMU-69002	1	1
232	R-MMU-69206	0	1
233	R-MMU-69231	0	1
234	R-MMU-69236	0	1
235	R-MMU-69275	1	0
236	R-MMU-69278	1	1
237	R-MMU-69298	0	1
238	R-MMU-69306	0	1
239	R-MMU-70614	0	1
240	R-MMU-71032	1	0
241	R-MMU-71387	1	0
242	R-MMU-71406	1	0
243	R-MMU-72649	0	1
244	R-MMU-72702	0	1
245	R-MMU-72706	0	1
246	R-MMU-72766	0	1
247	R-MMU-74160	1	1
248	R-MMU-75153	1	0
249	R-MMU-75893	1	0
250	R-MMU-76002	1	1
251	R-MMU-77289	1	0
252	R-MMU-877300	1	0
253	R-MMU-877312	1	0
254	R-MMU-8848021	0	1
255	R-MMU-8849471	0	1
256	R-MMU-8849932	1	0
257	R-MMU-8852135	1	0
258	R-MMU-8854214	1	0
259	R-MMU-8856825	1	0
260	R-MMU-8856828	1	0
261	R-MMU-8863795	0	1
262	R-MMU-8866376	1	0
263	R-MMU-8866652	1	0
264	R-MMU-8873719	1	0
265	R-MMU-901032	0	1
266	R-MMU-901042	0	1
267	R-MMU-913531	1	0
268	R-MMU-936440	0	1
269	R-MMU-936837	1	0
270	R-MMU-937061	1	0
271	R-MMU-937072	0	1
272	R-MMU-948021	1	0
273	R-MMU-975138	1	0
274	R-MMU-975155	1	0
275	R-MMU-975871	1	0

## Sheet: 3a5_overlap_GO
universe		A	B
1	R-MMU-1059683	0	1
2	R-MMU-109581	1	1
3	R-MMU-109582	1	1
4	R-MMU-111446	0	1
5	R-MMU-111447	1	0
6	R-MMU-111885	0	1
7	R-MMU-111933	0	1
8	R-MMU-111996	0	1
9	R-MMU-111997	0	1
10	R-MMU-112040	0	1
11	R-MMU-112043	0	1
12	R-MMU-112308	0	1
13	R-MMU-112314	0	1
14	R-MMU-112315	0	1
15	R-MMU-112316	0	1
16	R-MMU-112399	1	0
17	R-MMU-112412	1	0
18	R-MMU-114452	1	0
19	R-MMU-114508	0	1
20	R-MMU-114604	0	1
21	R-MMU-114608	1	0
22	R-MMU-1168372	1	0
23	R-MMU-1236394	1	0
24	R-MMU-1236973	0	1
25	R-MMU-1250347	1	0
26	R-MMU-1251985	0	1
27	R-MMU-1280215	1	0
28	R-MMU-1368110	1	0
29	R-MMU-139853	1	1
30	R-MMU-139910	0	1
31	R-MMU-1430728	0	1
32	R-MMU-1433557	1	1
33	R-MMU-1445148	1	0
34	R-MMU-1474290	0	1
35	R-MMU-1483255	0	1
36	R-MMU-1483257	0	1
37	R-MMU-1489509	0	1
38	R-MMU-1500931	0	1
39	R-MMU-1630316	1	1
40	R-MMU-163359	0	1
41	R-MMU-163685	0	1
42	R-MMU-1638091	0	1
43	R-MMU-1640170	1	1
44	R-MMU-1650814	0	1
45	R-MMU-1655829	0	1
46	R-MMU-166016	0	1
47	R-MMU-1660499	0	1
48	R-MMU-1660514	0	1
49	R-MMU-1660516	1	1
50	R-MMU-1660517	0	1
51	R-MMU-166054	0	1
52	R-MMU-166058	1	1
53	R-MMU-166166	1	1
54	R-MMU-166520	1	1
55	R-MMU-167021	0	1
56	R-MMU-167044	1	0
57	R-MMU-168138	1	1
58	R-MMU-168142	1	1
59	R-MMU-168164	1	1
60	R-MMU-168176	1	1
61	R-MMU-168179	1	1
62	R-MMU-168181	0	1
63	R-MMU-168188	1	1
64	R-MMU-168249	1	0
65	R-MMU-168643	0	1
66	R-MMU-168898	0	1
67	R-MMU-169893	1	0
68	R-MMU-170822	1	0
69	R-MMU-170834	0	1
70	R-MMU-170968	1	0
71	R-MMU-170984	1	0
72	R-MMU-171052	1	0
73	R-MMU-174362	1	0
74	R-MMU-177929	1	1
75	R-MMU-1793185	1	0
76	R-MMU-179812	1	0
77	R-MMU-180336	1	0
78	R-MMU-181438	1	1
79	R-MMU-186712	1	0
80	R-MMU-186763	1	1
81	R-MMU-186797	1	1
82	R-MMU-187037	1	1
83	R-MMU-187687	1	0
84	R-MMU-187706	1	0
85	R-MMU-191273	1	1
86	R-MMU-191647	0	1
87	R-MMU-191650	0	1
88	R-MMU-193648	0	1
89	R-MMU-193704	0	1
90	R-MMU-194138	1	1
91	R-MMU-194315	1	1
92	R-MMU-194840	0	1
93	R-MMU-195253	1	0
94	R-MMU-195258	1	1
95	R-MMU-195721	1	0
96	R-MMU-196299	0	1
97	R-MMU-196819	1	0
98	R-MMU-1980148	0	1
99	R-MMU-1980150	0	1
100	R-MMU-199220	0	1
101	R-MMU-199920	0	1
102	R-MMU-199977	0	1
103	R-MMU-199991	1	1
104	R-MMU-199992	1	1
105	R-MMU-202040	0	1
106	R-MMU-2022870	1	0
107	R-MMU-2022928	0	1
108	R-MMU-202403	1	0
109	R-MMU-2024096	0	1
110	R-MMU-202424	1	0
111	R-MMU-204005	0	1
112	R-MMU-204174	0	1
113	R-MMU-204998	0	1
114	R-MMU-210745	1	0
115	R-MMU-212436	1	1
116	R-MMU-212718	0	1
117	R-MMU-2142789	1	0
118	R-MMU-2172127	1	1
119	R-MMU-2173793	0	1
120	R-MMU-2173796	0	1
121	R-MMU-2404192	1	0
122	R-MMU-2424491	1	1
123	R-MMU-2426168	0	1
124	R-MMU-2428924	1	0
125	R-MMU-2428928	1	0
126	R-MMU-2428933	1	0
127	R-MMU-2454202	1	1
128	R-MMU-2467813	1	0
129	R-MMU-2470946	0	1
130	R-MMU-2500257	1	1
131	R-MMU-2555396	1	0
132	R-MMU-2586552	1	0
133	R-MMU-264870	0	1
134	R-MMU-2682334	0	1
135	R-MMU-2730905	1	0
136	R-MMU-2871796	1	0
137	R-MMU-2871809	1	1
138	R-MMU-2871837	1	0
139	R-MMU-2980766	0	1
140	R-MMU-2990846	1	1
141	R-MMU-3065676	0	1
142	R-MMU-3108214	1	1
143	R-MMU-3108232	1	0
144	R-MMU-354192	1	0
145	R-MMU-373755	1	1
146	R-MMU-373760	0	1
147	R-MMU-375165	1	0
148	R-MMU-380615	0	1
149	R-MMU-383280	0	1
150	R-MMU-3858494	1	0
151	R-MMU-392451	0	1
152	R-MMU-392499	1	1
153	R-MMU-392517	0	1
154	R-MMU-392518	0	1
155	R-MMU-3928665	0	1
156	R-MMU-397795	0	1
157	R-MMU-399719	0	1
158	R-MMU-399721	0	1
159	R-MMU-400685	1	1
160	R-MMU-4085001	0	1
161	R-MMU-4086398	1	0
162	R-MMU-416476	0	1
163	R-MMU-416482	0	1
164	R-MMU-416572	1	1
165	R-MMU-418346	0	1
166	R-MMU-418360	1	1
167	R-MMU-418592	0	1
168	R-MMU-418990	0	1
169	R-MMU-421270	0	1
170	R-MMU-421837	1	1
171	R-MMU-422356	0	1
172	R-MMU-422475	1	1
173	R-MMU-425393	0	1
174	R-MMU-425561	0	1
175	R-MMU-432040	0	1
176	R-MMU-432142	0	1
177	R-MMU-432722	0	1
178	R-MMU-433692	1	0
179	R-MMU-438064	0	1
180	R-MMU-438066	0	1
181	R-MMU-4420097	1	1
182	R-MMU-442717	1	1
183	R-MMU-442720	0	1
184	R-MMU-442729	0	1
185	R-MMU-442742	0	1
186	R-MMU-442755	0	1
187	R-MMU-445989	0	1
188	R-MMU-446193	0	1
189	R-MMU-446203	0	1
190	R-MMU-446219	0	1
191	R-MMU-446353	1	0
192	R-MMU-446388	1	0
193	R-MMU-446652	1	1
194	R-MMU-446728	0	1
195	R-MMU-447041	0	1
196	R-MMU-449147	1	0
197	R-MMU-450282	0	1
198	R-MMU-450294	1	1
199	R-MMU-450321	1	0
200	R-MMU-450520	1	0
201	R-MMU-450531	1	0
202	R-MMU-451927	1	0
203	R-MMU-4641262	0	1
204	R-MMU-508751	1	0
205	R-MMU-512988	1	0
206	R-MMU-5218921	1	0
207	R-MMU-532668	1	0
208	R-MMU-5357801	1	1
209	R-MMU-5357956	0	1
210	R-MMU-556833	0	1
211	R-MMU-5576891	0	1
212	R-MMU-5576892	0	1
213	R-MMU-5578775	0	1
214	R-MMU-5607763	1	1
215	R-MMU-5607764	1	1
216	R-MMU-5610783	0	1
217	R-MMU-5620916	0	1
218	R-MMU-5621481	1	1
219	R-MMU-5626978	0	1
220	R-MMU-5628897	1	0
221	R-MMU-5653656	1	1
222	R-MMU-5661270	1	0
223	R-MMU-5663220	1	1
224	R-MMU-5673000	1	0
225	R-MMU-5673001	1	0
226	R-MMU-5683057	1	1
227	R-MMU-5684996	1	0
228	R-MMU-5688426	1	0
229	R-MMU-5689603	1	0
230	R-MMU-5693565	1	0
231	R-MMU-5693571	1	0
232	R-MMU-5693606	1	0
233	R-MMU-597592	1	1
234	R-MMU-6794362	0	1
235	R-MMU-6804758	0	1
236	R-MMU-6804759	0	1
237	R-MMU-6807047	1	1
238	R-MMU-6807062	1	1
239	R-MMU-6811440	0	1
240	R-MMU-6811442	0	1
241	R-MMU-68875	0	1
242	R-MMU-68877	1	1
243	R-MMU-68882	1	0
244	R-MMU-68886	1	1
245	R-MMU-69275	1	0
246	R-MMU-69278	1	1
247	R-MMU-69473	1	0
248	R-MMU-69481	1	0
249	R-MMU-69620	1	0
250	R-MMU-70153	1	0
251	R-MMU-70171	1	0
252	R-MMU-70263	1	0
253	R-MMU-70326	1	0
254	R-MMU-71032	0	1
255	R-MMU-71387	1	1
256	R-MMU-71403	1	0
257	R-MMU-73887	0	1
258	R-MMU-74160	1	0
259	R-MMU-74749	1	0
260	R-MMU-74751	1	0
261	R-MMU-74752	1	0
262	R-MMU-75035	1	0
263	R-MMU-75153	0	1
264	R-MMU-75893	0	1
265	R-MMU-76002	1	1
266	R-MMU-76005	1	0
267	R-MMU-877300	1	1
268	R-MMU-877312	1	1
269	R-MMU-881907	1	1
270	R-MMU-8847453	0	1
271	R-MMU-8849468	0	1
272	R-MMU-8853659	1	0
273	R-MMU-8854214	1	0
274	R-MMU-8856688	0	1
275	R-MMU-8856828	0	1
276	R-MMU-8873719	0	1
277	R-MMU-8948216	0	1
278	R-MMU-901032	1	0
279	R-MMU-901042	1	0
280	R-MMU-912526	1	0
281	R-MMU-913531	1	0
282	R-MMU-937039	0	1
283	R-MMU-937061	1	1
284	R-MMU-948021	1	1
285	R-MMU-975138	1	1
286	R-MMU-975144	0	1
287	R-MMU-975155	0	1
288	R-MMU-975577	0	1
289	R-MMU-975871	1	1
290	R-MMU-983705	1	0

## Sheet: 3y1_overlap_GO
universe		A	B
1	R-MMU-1059683	1	0
2	R-MMU-109581	1	0
3	R-MMU-111446	1	0
4	R-MMU-111885	1	0
5	R-MMU-112399	1	0
6	R-MMU-112412	1	0
7	R-MMU-113510	1	0
8	R-MMU-1169408	1	0
9	R-MMU-1169410	1	0
10	R-MMU-1234158	1	0
11	R-MMU-1257604	1	0
12	R-MMU-1368108	1	0
13	R-MMU-1368110	1	0
14	R-MMU-140179	1	0
15	R-MMU-140342	1	0
16	R-MMU-141334	1	0
17	R-MMU-1428517	1	0
18	R-MMU-1433557	1	0
19	R-MMU-1482788	1	0
20	R-MMU-1483249	1	0
21	R-MMU-1483257	1	0
22	R-MMU-1538133	1	0
23	R-MMU-163210	1	0
24	R-MMU-1638091	0	1
25	R-MMU-166016	1	0
26	R-MMU-166054	1	0
27	R-MMU-166058	1	0
28	R-MMU-166166	1	0
29	R-MMU-166520	1	0
30	R-MMU-167044	1	0
31	R-MMU-168138	1	0
32	R-MMU-168142	1	0
33	R-MMU-168164	1	0
34	R-MMU-168176	1	0
35	R-MMU-168179	1	0
36	R-MMU-168181	1	0
37	R-MMU-168188	1	0
38	R-MMU-168249	1	0
39	R-MMU-168256	1	0
40	R-MMU-169893	1	0
41	R-MMU-170834	1	0
42	R-MMU-170968	1	0
43	R-MMU-170984	1	0
44	R-MMU-177929	1	0
45	R-MMU-179812	1	0
46	R-MMU-180024	1	0
47	R-MMU-180292	1	0
48	R-MMU-180336	1	0
49	R-MMU-181438	1	0
50	R-MMU-1855191	1	0
51	R-MMU-186763	1	0
52	R-MMU-186797	1	0
53	R-MMU-187037	1	0
54	R-MMU-187687	1	0
55	R-MMU-187706	1	0
56	R-MMU-193648	1	0
57	R-MMU-193704	1	0
58	R-MMU-194138	1	0
59	R-MMU-194315	1	0
60	R-MMU-194840	1	0
61	R-MMU-195258	1	0
62	R-MMU-198203	1	0
63	R-MMU-198725	1	0
64	R-MMU-198753	1	0
65	R-MMU-199920	1	0
66	R-MMU-199991	1	0
67	R-MMU-2022928	0	1
68	R-MMU-2029480	1	0
69	R-MMU-2029485	1	0
70	R-MMU-204005	1	0
71	R-MMU-2046105	1	0
72	R-MMU-204998	1	0
73	R-MMU-211227	1	0
74	R-MMU-2172127	1	0
75	R-MMU-2173793	1	0
76	R-MMU-2173796	1	0
77	R-MMU-2404192	1	0
78	R-MMU-2424491	1	0
79	R-MMU-2428924	1	0
80	R-MMU-2428928	1	0
81	R-MMU-2454202	1	0
82	R-MMU-2586552	1	0
83	R-MMU-2682334	1	0
84	R-MMU-2730905	1	0
85	R-MMU-2871796	1	0
86	R-MMU-3134973	1	0
87	R-MMU-3371568	1	0
88	R-MMU-351200	1	0
89	R-MMU-375165	1	0
90	R-MMU-389513	1	0
91	R-MMU-392170	1	0
92	R-MMU-392518	1	0
93	R-MMU-3928662	1	0
94	R-MMU-3928663	1	0
95	R-MMU-400685	1	0
96	R-MMU-416482	1	0
97	R-MMU-418359	1	0
98	R-MMU-418592	1	0
99	R-MMU-422475	1	0
100	R-MMU-4420097	1	0
101	R-MMU-444257	1	0
102	R-MMU-446388	1	0
103	R-MMU-447038	1	0
104	R-MMU-450282	1	0
105	R-MMU-450294	1	0
106	R-MMU-451326	1	0
107	R-MMU-451927	1	0
108	R-MMU-4641257	0	1
109	R-MMU-512988	1	0
110	R-MMU-5218921	1	0
111	R-MMU-535734	1	0
112	R-MMU-5357801	1	0
113	R-MMU-556833	1	0
114	R-MMU-5617833	1	0
115	R-MMU-5620912	1	0
116	R-MMU-5627117	1	0
117	R-MMU-5627123	1	0
118	R-MMU-5653656	1	0
119	R-MMU-5653890	1	0
120	R-MMU-5658623	1	0
121	R-MMU-5673000	1	0
122	R-MMU-5673001	1	0
123	R-MMU-5683057	1	0
124	R-MMU-5684996	1	0
125	R-MMU-6804757	1	0
126	R-MMU-6806003	1	0
127	R-MMU-6806834	1	0
128	R-MMU-6807004	1	0
129	R-MMU-6811436	1	0
130	R-MMU-69231	1	0
131	R-MMU-69236	1	0
132	R-MMU-69278	1	0
133	R-MMU-70268	1	0
134	R-MMU-71406	1	0
135	R-MMU-72086	0	1
136	R-MMU-74751	1	0
137	R-MMU-74752	1	0
138	R-MMU-75105	0	1
139	R-MMU-75109	1	1
140	R-MMU-75153	1	0
141	R-MMU-75876	1	1
142	R-MMU-77075	0	1
143	R-MMU-877300	1	0
144	R-MMU-8848021	1	0
145	R-MMU-8849471	1	0
146	R-MMU-8853659	1	0
147	R-MMU-8876198	1	0
148	R-MMU-888593	1	0
149	R-MMU-912526	1	0
150	R-MMU-913531	1	0
151	R-MMU-918233	1	0
152	R-MMU-937039	1	0
153	R-MMU-937061	1	0
154	R-MMU-975138	1	0
155	R-MMU-975144	1	0
156	R-MMU-975155	1	0
157	R-MMU-975871	1	0

## Sheet: 3y2_overlap_GO
universe		A	B
1	R-MMU-1059683	1	1
2	R-MMU-109581	1	1
16	R-MMU-114508	1	1
20	R-MMU-1257604	1	1
33	R-MMU-1655829	1	1
34	R-MMU-166016	1	1
36	R-MMU-1660516	1	1
38	R-MMU-166054	1	1
39	R-MMU-166058	1	1
42	R-MMU-166520	1	1
44	R-MMU-168138	1	1
45	R-MMU-168142	1	1
47	R-MMU-168176	1	1
48	R-MMU-168179	1	1
49	R-MMU-168181	1	1
50	R-MMU-168188	1	1
53	R-MMU-168638	1	1
55	R-MMU-168898	1	1
58	R-MMU-170834	1	1
61	R-MMU-171052	1	1
66	R-MMU-180292	1	1
69	R-MMU-181438	1	1
79	R-MMU-194315	1	1
86	R-MMU-199977	1	1
94	R-MMU-2173788	1	1
95	R-MMU-2173789	1	1
100	R-MMU-2426168	1	1
103	R-MMU-2454202	1	1
109	R-MMU-373760	1	1
119	R-MMU-3928662	1	1
122	R-MMU-397014	1	1
135	R-MMU-422475	1	1
141	R-MMU-445355	1	1
145	R-MMU-446652	1	1
149	R-MMU-450294	1	1
151	R-MMU-450321	1	1
166	R-MMU-5357801	1	1
168	R-MMU-5357956	1	1
186	R-MMU-597592	1	1
218	R-MMU-877300	1	1
219	R-MMU-877312	1	1
230	R-MMU-937039	1	1
232	R-MMU-937061	1	1
235	R-MMU-975138	1	1
236	R-MMU-975144	1	1
237	R-MMU-975155	1	1
239	R-MMU-975871	1	1
3	R-MMU-109582	0	1
4	R-MMU-109606	0	1
5	R-MMU-111453	0	1
6	R-MMU-111471	0	1
15	R-MMU-114452	0	1
24	R-MMU-139910	0	1
28	R-MMU-1483255	0	1
29	R-MMU-1483257	0	1
30	R-MMU-1500931	0	1
31	R-MMU-156581	0	1
32	R-MMU-157579	0	1
35	R-MMU-1660499	0	1
37	R-MMU-1660517	0	1
41	R-MMU-166166	0	1
46	R-MMU-168164	0	1
54	R-MMU-168643	0	1
57	R-MMU-170670	0	1
68	R-MMU-180786	0	1
76	R-MMU-193648	0	1
77	R-MMU-193704	0	1
80	R-MMU-194840	0	1
82	R-MMU-196836	0	1
84	R-MMU-198693	0	1
87	R-MMU-199991	0	1
91	R-MMU-204998	0	1
92	R-MMU-2142850	0	1
105	R-MMU-2682334	0	1
108	R-MMU-373755	0	1
111	R-MMU-375280	0	1
112	R-MMU-389356	0	1
113	R-MMU-389357	0	1
115	R-MMU-390666	0	1
116	R-MMU-392170	0	1
117	R-MMU-392499	0	1
118	R-MMU-392518	0	1
120	R-MMU-3928663	0	1
121	R-MMU-3928665	0	1
123	R-MMU-400685	0	1
124	R-MMU-416476	0	1
125	R-MMU-416482	0	1
126	R-MMU-416550	0	1
127	R-MMU-416572	0	1
128	R-MMU-416700	0	1
129	R-MMU-418346	0	1
131	R-MMU-418360	0	1
132	R-MMU-418597	0	1
134	R-MMU-421270	0	1
137	R-MMU-432142	0	1
142	R-MMU-445989	0	1
143	R-MMU-446203	0	1
146	R-MMU-446728	0	1
148	R-MMU-450282	0	1
150	R-MMU-450302	0	1
152	R-MMU-450520	0	1
155	R-MMU-453279	0	1
157	R-MMU-4641265	0	1
161	R-MMU-5218920	0	1
163	R-MMU-532668	0	1
169	R-MMU-556833	0	1
170	R-MMU-5576891	0	1
171	R-MMU-5576894	0	1
172	R-MMU-5578775	0	1
177	R-MMU-5627123	0	1
179	R-MMU-5669034	0	1
187	R-MMU-6794361	0	1
188	R-MMU-6794362	0	1
189	R-MMU-6804758	0	1
190	R-MMU-6806834	0	1
191	R-MMU-6807004	0	1
196	R-MMU-68962	0	1
197	R-MMU-69231	0	1
198	R-MMU-69236	0	1
199	R-MMU-69242	0	1
201	R-MMU-69278	0	1
202	R-MMU-70171	0	1
203	R-MMU-70263	0	1
205	R-MMU-70326	0	1
206	R-MMU-71387	0	1
207	R-MMU-71406	0	1
210	R-MMU-73847	0	1
211	R-MMU-74217	0	1
212	R-MMU-74259	0	1
217	R-MMU-76002	0	1
221	R-MMU-8849471	0	1
223	R-MMU-888590	0	1
224	R-MMU-901032	0	1
225	R-MMU-901042	0	1
229	R-MMU-913709	0	1
231	R-MMU-937042	0	1
233	R-MMU-948021	0	1
238	R-MMU-975163	0	1
240	R-MMU-977444	0	1
242	R-MMU-991365	0	1
243	R-MMU-997269	0	1
7	R-MMU-111885	1	0
8	R-MMU-111933	1	0
9	R-MMU-111996	1	0
10	R-MMU-111997	1	0
11	R-MMU-112040	1	0
12	R-MMU-112043	1	0
13	R-MMU-112399	1	0
14	R-MMU-112412	1	0
17	R-MMU-1168372	1	0
18	R-MMU-1169408	1	0
19	R-MMU-1169410	1	0
21	R-MMU-1266738	1	0
22	R-MMU-1280215	1	0
23	R-MMU-1280218	1	0
25	R-MMU-1433557	1	0
26	R-MMU-1433559	1	0
27	R-MMU-1482798	1	0
40	R-MMU-1660661	1	0
43	R-MMU-167044	1	0
51	R-MMU-168249	1	0
52	R-MMU-168256	1	0
56	R-MMU-169893	1	0
59	R-MMU-170968	1	0
60	R-MMU-170984	1	0
62	R-MMU-174362	1	0
63	R-MMU-177504	1	0
64	R-MMU-177929	1	0
65	R-MMU-179812	1	0
67	R-MMU-180336	1	0
70	R-MMU-186763	1	0
71	R-MMU-186797	1	0
72	R-MMU-187037	1	0
73	R-MMU-187687	1	0
74	R-MMU-187706	1	0
75	R-MMU-191273	1	0
78	R-MMU-194138	1	0
81	R-MMU-195258	1	0
83	R-MMU-198203	1	0
85	R-MMU-199418	1	0
88	R-MMU-202403	1	0
89	R-MMU-202424	1	0
90	R-MMU-204174	1	0
93	R-MMU-2172127	1	0
96	R-MMU-2173793	1	0
97	R-MMU-2173796	1	0
98	R-MMU-2404192	1	0
99	R-MMU-2424491	1	0
101	R-MMU-2428924	1	0
102	R-MMU-2428928	1	0
104	R-MMU-2586552	1	0
106	R-MMU-2730905	1	0
107	R-MMU-2871796	1	0
110	R-MMU-375165	1	0
114	R-MMU-389513	1	0
130	R-MMU-418359	1	0
133	R-MMU-418889	1	0
136	R-MMU-426048	1	0
138	R-MMU-437239	1	0
139	R-MMU-4420097	1	0
140	R-MMU-445095	1	0
144	R-MMU-446353	1	0
147	R-MMU-449147	1	0
153	R-MMU-451927	1	0
154	R-MMU-453274	1	0
156	R-MMU-4641262	1	0
158	R-MMU-5099900	1	0
159	R-MMU-512988	1	0
160	R-MMU-5140745	1	0
162	R-MMU-5218921	1	0
164	R-MMU-5357769	1	0
165	R-MMU-5357786	1	0
167	R-MMU-5357905	1	0
173	R-MMU-5607764	1	0
174	R-MMU-5621481	1	0
175	R-MMU-5626467	1	0
176	R-MMU-5626978	1	0
178	R-MMU-5663220	1	0
180	R-MMU-5673000	1	0
181	R-MMU-5673001	1	0
182	R-MMU-5683057	1	0
183	R-MMU-5684996	1	0
184	R-MMU-5688426	1	0
185	R-MMU-5689880	1	0
192	R-MMU-6807047	1	0
193	R-MMU-6807062	1	0
194	R-MMU-6807878	1	0
195	R-MMU-6811558	1	0
200	R-MMU-69275	1	0
204	R-MMU-70268	1	0
208	R-MMU-72163	1	0
209	R-MMU-72172	1	0
213	R-MMU-74713	1	0
214	R-MMU-74751	1	0
215	R-MMU-74752	1	0
216	R-MMU-75893	1	0
220	R-MMU-881907	1	0
222	R-MMU-8853659	1	0
226	R-MMU-912526	1	0
227	R-MMU-912694	1	0
228	R-MMU-913531	1	0
234	R-MMU-975110	1	0
241	R-MMU-983705	1	0

## Sheet: 3y3_overlap_GO
universe		A	B
1	R-MMU-1059683	1	1
2	R-MMU-109581	1	1
3	R-MMU-109582	0	1
4	R-MMU-109606	0	1
5	R-MMU-111453	0	1
6	R-MMU-111471	0	1
7	R-MMU-111885	1	0
8	R-MMU-111933	1	0
9	R-MMU-111996	1	0
10	R-MMU-111997	1	0
11	R-MMU-112040	1	0
12	R-MMU-112043	1	0
13	R-MMU-112399	1	0
14	R-MMU-112412	1	0
15	R-MMU-114452	0	1
16	R-MMU-114508	1	1
17	R-MMU-1168372	1	0
18	R-MMU-1169408	1	0
19	R-MMU-1169410	1	0
20	R-MMU-1257604	1	1
21	R-MMU-1266738	1	0
22	R-MMU-1280215	1	0
23	R-MMU-1280218	1	0
24	R-MMU-139910	0	1
25	R-MMU-1433557	1	0
26	R-MMU-1433559	1	0
27	R-MMU-1482798	1	0
28	R-MMU-1483255	0	1
29	R-MMU-1483257	0	1
30	R-MMU-1500931	0	1
31	R-MMU-156581	0	1
32	R-MMU-157579	0	1
33	R-MMU-1655829	1	1
34	R-MMU-166016	1	1
35	R-MMU-1660499	0	1
36	R-MMU-1660516	1	1
37	R-MMU-1660517	0	1
38	R-MMU-166054	1	1
39	R-MMU-166058	1	1
40	R-MMU-1660661	1	0
41	R-MMU-166166	0	1
42	R-MMU-166520	1	1
43	R-MMU-167044	1	0
44	R-MMU-168138	1	1
45	R-MMU-168142	1	1
46	R-MMU-168164	0	1
47	R-MMU-168176	1	1
48	R-MMU-168179	1	1
49	R-MMU-168181	1	1
50	R-MMU-168188	1	1
51	R-MMU-168249	1	0
52	R-MMU-168256	1	0
53	R-MMU-168638	1	1
54	R-MMU-168643	0	1
55	R-MMU-168898	1	1
56	R-MMU-169893	1	0
57	R-MMU-170670	0	1
58	R-MMU-170834	1	1
59	R-MMU-170968	1	0
60	R-MMU-170984	1	0
61	R-MMU-171052	1	1
62	R-MMU-174362	1	0
63	R-MMU-177504	1	0
64	R-MMU-177929	1	0
65	R-MMU-179812	1	0
66	R-MMU-180292	1	1
67	R-MMU-180336	1	0
68	R-MMU-180786	0	1
69	R-MMU-181438	1	1
70	R-MMU-186763	1	0
71	R-MMU-186797	1	0
72	R-MMU-187037	1	0
73	R-MMU-187687	1	0
74	R-MMU-187706	1	0
75	R-MMU-191273	1	0
76	R-MMU-193648	0	1
77	R-MMU-193704	0	1
78	R-MMU-194138	1	0
79	R-MMU-194315	1	1
80	R-MMU-194840	0	1
81	R-MMU-195258	1	0
82	R-MMU-196836	0	1
83	R-MMU-198203	1	0
84	R-MMU-198693	0	1
85	R-MMU-199418	1	0
86	R-MMU-199977	1	1
87	R-MMU-199991	0	1
88	R-MMU-202403	1	0
89	R-MMU-202424	1	0
90	R-MMU-204174	1	0
91	R-MMU-204998	0	1
92	R-MMU-2142850	0	1
93	R-MMU-2172127	1	0
94	R-MMU-2173788	1	1
95	R-MMU-2173789	1	1
96	R-MMU-2173793	1	0
97	R-MMU-2173796	1	0
98	R-MMU-2404192	1	0
99	R-MMU-2424491	1	0
100	R-MMU-2426168	1	1
101	R-MMU-2428924	1	0
102	R-MMU-2428928	1	0
103	R-MMU-2454202	1	1
104	R-MMU-2586552	1	0
105	R-MMU-2682334	0	1
106	R-MMU-2730905	1	0
107	R-MMU-2871796	1	0
108	R-MMU-373755	0	1
109	R-MMU-373760	1	1
110	R-MMU-375165	1	0
111	R-MMU-375280	0	1
112	R-MMU-389356	0	1
113	R-MMU-389357	0	1
114	R-MMU-389513	1	0
115	R-MMU-390666	0	1
116	R-MMU-392170	0	1
117	R-MMU-392499	0	1
118	R-MMU-392518	0	1
119	R-MMU-3928662	1	1
120	R-MMU-3928663	0	1
121	R-MMU-3928665	0	1
122	R-MMU-397014	1	1
123	R-MMU-400685	0	1
124	R-MMU-416476	0	1
125	R-MMU-416482	0	1
126	R-MMU-416550	0	1
127	R-MMU-416572	0	1
128	R-MMU-416700	0	1
129	R-MMU-418346	0	1
130	R-MMU-418359	1	0
131	R-MMU-418360	0	1
132	R-MMU-418597	0	1
133	R-MMU-418889	1	0
134	R-MMU-421270	0	1
135	R-MMU-422475	1	1
136	R-MMU-426048	1	0
137	R-MMU-432142	0	1
138	R-MMU-437239	1	0
139	R-MMU-4420097	1	0
140	R-MMU-445095	1	0
141	R-MMU-445355	1	1
142	R-MMU-445989	0	1
143	R-MMU-446203	0	1
144	R-MMU-446353	1	0
145	R-MMU-446652	1	1
146	R-MMU-446728	0	1
147	R-MMU-449147	1	0
148	R-MMU-450282	0	1
149	R-MMU-450294	1	1
150	R-MMU-450302	0	1
151	R-MMU-450321	1	1
152	R-MMU-450520	0	1
153	R-MMU-451927	1	0
154	R-MMU-453274	1	0
155	R-MMU-453279	0	1
156	R-MMU-4641262	1	0
157	R-MMU-4641265	0	1
158	R-MMU-5099900	1	0
159	R-MMU-512988	1	0
160	R-MMU-5140745	1	0
161	R-MMU-5218920	0	1
162	R-MMU-5218921	1	0
163	R-MMU-532668	0	1
164	R-MMU-5357769	1	0
165	R-MMU-5357786	1	0
166	R-MMU-5357801	1	1
167	R-MMU-5357905	1	0
168	R-MMU-5357956	1	1
169	R-MMU-556833	0	1
170	R-MMU-5576891	0	1
171	R-MMU-5576894	0	1
172	R-MMU-5578775	0	1
173	R-MMU-5607764	1	0
174	R-MMU-5621481	1	0
175	R-MMU-5626467	1	0
176	R-MMU-5626978	1	0
177	R-MMU-5627123	0	1
178	R-MMU-5663220	1	0
179	R-MMU-5669034	0	1
180	R-MMU-5673000	1	0
181	R-MMU-5673001	1	0
182	R-MMU-5683057	1	0
183	R-MMU-5684996	1	0
184	R-MMU-5688426	1	0
185	R-MMU-5689880	1	0
186	R-MMU-597592	1	1
187	R-MMU-6794361	0	1
188	R-MMU-6794362	0	1
189	R-MMU-6804758	0	1
190	R-MMU-6806834	0	1
191	R-MMU-6807004	0	1
192	R-MMU-6807047	1	0
193	R-MMU-6807062	1	0
194	R-MMU-6807878	1	0
195	R-MMU-6811558	1	0
196	R-MMU-68962	0	1
197	R-MMU-69231	0	1
198	R-MMU-69236	0	1
199	R-MMU-69242	0	1
200	R-MMU-69275	1	0
201	R-MMU-69278	0	1
202	R-MMU-70171	0	1
203	R-MMU-70263	0	1
204	R-MMU-70268	1	0
205	R-MMU-70326	0	1
206	R-MMU-71387	0	1
207	R-MMU-71406	0	1
208	R-MMU-72163	1	0
209	R-MMU-72172	1	0
210	R-MMU-73847	0	1
211	R-MMU-74217	0	1
212	R-MMU-74259	0	1
213	R-MMU-74713	1	0
214	R-MMU-74751	1	0
215	R-MMU-74752	1	0
216	R-MMU-75893	1	0
217	R-MMU-76002	0	1
218	R-MMU-877300	1	1
219	R-MMU-877312	1	1
220	R-MMU-881907	1	0
221	R-MMU-8849471	0	1
222	R-MMU-8853659	1	0
223	R-MMU-888590	0	1
224	R-MMU-901032	0	1
225	R-MMU-901042	0	1
226	R-MMU-912526	1	0
227	R-MMU-912694	1	0
228	R-MMU-913531	1	0
229	R-MMU-913709	0	1
230	R-MMU-937039	1	1
231	R-MMU-937042	0	1
232	R-MMU-937061	1	1
233	R-MMU-948021	0	1
234	R-MMU-975110	1	0
235	R-MMU-975138	1	1
236	R-MMU-975144	1	1
237	R-MMU-975155	1	1
238	R-MMU-975163	0	1
239	R-MMU-975871	1	1
240	R-MMU-977444	0	1
241	R-MMU-983705	1	0
242	R-MMU-991365	0	1
243	R-MMU-997269	0	1

## Sheet: 3y4_overlap_GO
universe		A	B
1	R-MMU-1059683	0	1
2	R-MMU-109581	1	1
3	R-MMU-109582	1	1
4	R-MMU-109606	0	1
5	R-MMU-111446	1	0
6	R-MMU-111447	0	1
7	R-MMU-111453	0	1
8	R-MMU-111471	0	1
9	R-MMU-111885	0	1
10	R-MMU-111933	0	1
11	R-MMU-111996	0	1
12	R-MMU-111997	0	1
13	R-MMU-112040	0	1
14	R-MMU-112043	0	1
15	R-MMU-112308	1	0
16	R-MMU-112316	1	1
17	R-MMU-112399	1	0
18	R-MMU-112412	1	0
19	R-MMU-113510	1	0
20	R-MMU-114452	1	1
21	R-MMU-114508	1	1
22	R-MMU-114604	0	1
23	R-MMU-1168372	1	0
24	R-MMU-1257604	1	1
25	R-MMU-1280215	1	0
26	R-MMU-1280218	1	1
27	R-MMU-139910	1	0
28	R-MMU-141424	0	1
29	R-MMU-141444	0	1
30	R-MMU-1433557	1	1
31	R-MMU-1433559	1	1
32	R-MMU-1483255	1	1
33	R-MMU-1483257	1	1
34	R-MMU-1500931	1	1
35	R-MMU-1538133	1	0
36	R-MMU-157118	0	1
37	R-MMU-159236	0	1
38	R-MMU-163685	0	1
39	R-MMU-1640170	1	1
40	R-MMU-164378	1	1
41	R-MMU-1655829	0	1
42	R-MMU-166016	1	1
43	R-MMU-1660499	0	1
44	R-MMU-1660516	1	1
45	R-MMU-166054	1	1
46	R-MMU-166058	1	1
47	R-MMU-166166	1	1
48	R-MMU-166520	1	1
49	R-MMU-167044	1	0
50	R-MMU-168138	1	1
51	R-MMU-168142	1	1
52	R-MMU-168164	1	1
53	R-MMU-168176	1	1
54	R-MMU-168179	1	1
55	R-MMU-168181	1	1
56	R-MMU-168188	1	1
57	R-MMU-168249	1	0
58	R-MMU-168256	1	0
59	R-MMU-168638	1	0
60	R-MMU-168643	1	0
61	R-MMU-168898	1	0
62	R-MMU-169893	1	0
63	R-MMU-170822	0	1
64	R-MMU-170834	1	1
65	R-MMU-170968	1	0
66	R-MMU-170984	1	0
67	R-MMU-177929	1	1
68	R-MMU-179812	1	0
69	R-MMU-180292	1	0
70	R-MMU-180336	1	0
71	R-MMU-181438	1	1
72	R-MMU-1855191	0	1
73	R-MMU-186712	1	0
74	R-MMU-186763	1	1
75	R-MMU-186797	1	1
76	R-MMU-187037	1	1
77	R-MMU-187687	1	0
78	R-MMU-187706	1	0
79	R-MMU-189200	0	1
80	R-MMU-1912408	0	1
81	R-MMU-191647	1	0
82	R-MMU-191650	1	0
83	R-MMU-193648	1	1
84	R-MMU-193704	1	0
85	R-MMU-194138	1	1
86	R-MMU-194306	0	1
87	R-MMU-194315	1	1
88	R-MMU-194840	1	1
89	R-MMU-195258	1	1
90	R-MMU-196819	1	0
91	R-MMU-196836	1	0
92	R-MMU-1980143	0	1
93	R-MMU-1980145	0	1
94	R-MMU-1980148	0	1
95	R-MMU-1980150	0	1
96	R-MMU-198203	1	1
97	R-MMU-198725	0	1
98	R-MMU-198753	0	1
99	R-MMU-199418	1	0
100	R-MMU-199920	0	1
101	R-MMU-199991	1	1
102	R-MMU-2022928	0	1
103	R-MMU-2029480	1	0
104	R-MMU-2029485	1	0
105	R-MMU-204998	1	1
106	R-MMU-210745	1	0
107	R-MMU-210993	0	1
108	R-MMU-2122947	0	1
109	R-MMU-212436	1	1
110	R-MMU-212718	0	1
111	R-MMU-2142850	0	1
112	R-MMU-2172127	1	1
113	R-MMU-2173788	1	1
114	R-MMU-2173789	1	0
115	R-MMU-2173793	1	1
116	R-MMU-2173796	1	1
117	R-MMU-2197563	0	1
118	R-MMU-2404192	1	0
119	R-MMU-2424491	1	1
120	R-MMU-2426168	1	1
121	R-MMU-2428924	1	0
122	R-MMU-2428928	1	0
123	R-MMU-2428933	0	1
124	R-MMU-2454202	1	1
125	R-MMU-2467813	0	1
126	R-MMU-2470946	0	1
127	R-MMU-2500257	0	1
128	R-MMU-2565942	1	0
129	R-MMU-2586552	1	0
130	R-MMU-2682334	1	1
131	R-MMU-2730905	1	1
132	R-MMU-2871796	1	1
133	R-MMU-2871809	1	1
134	R-MMU-2980766	1	1
135	R-MMU-2990846	0	1
136	R-MMU-2995383	1	0
137	R-MMU-2995410	1	0
138	R-MMU-3108214	0	1
139	R-MMU-3108232	0	1
140	R-MMU-3214841	1	0
141	R-MMU-3301854	0	1
142	R-MMU-3371453	0	1
143	R-MMU-3371556	0	1
144	R-MMU-3371568	0	1
145	R-MMU-350054	0	1
146	R-MMU-373752	1	1
147	R-MMU-373755	1	1
148	R-MMU-373760	0	1
149	R-MMU-375165	1	0
150	R-MMU-383280	1	0
151	R-MMU-389513	1	1
152	R-MMU-391908	0	1
153	R-MMU-392451	0	1
154	R-MMU-392499	0	1
155	R-MMU-392851	0	1
156	R-MMU-3928662	1	0
157	R-MMU-3928663	1	1
158	R-MMU-3928664	1	0
159	R-MMU-3928665	1	1
160	R-MMU-397795	0	1
161	R-MMU-400685	0	1
162	R-MMU-416482	1	1
163	R-MMU-416550	1	1
164	R-MMU-418346	0	1
165	R-MMU-418555	1	0
166	R-MMU-418592	0	1
167	R-MMU-418597	1	1
168	R-MMU-418885	1	0
169	R-MMU-418889	0	1
170	R-MMU-418990	1	1
171	R-MMU-420597	0	1
172	R-MMU-421270	1	1
173	R-MMU-422475	1	1
174	R-MMU-425393	0	1
175	R-MMU-425407	0	1
176	R-MMU-425561	0	1
177	R-MMU-438064	1	0
178	R-MMU-4419969	1	0
179	R-MMU-4420097	1	1
180	R-MMU-442720	1	0
181	R-MMU-442742	1	0
182	R-MMU-442755	1	0
183	R-MMU-444257	0	1
184	R-MMU-445095	0	1
185	R-MMU-445989	1	0
186	R-MMU-446203	0	1
187	R-MMU-446353	1	1
188	R-MMU-446652	1	0
189	R-MMU-446728	1	1
190	R-MMU-447038	0	1
191	R-MMU-447115	1	0
192	R-MMU-449147	1	0
193	R-MMU-450282	0	1
194	R-MMU-450294	1	1
195	R-MMU-450302	1	0
196	R-MMU-450321	1	0
197	R-MMU-450520	1	0
198	R-MMU-451306	0	1
199	R-MMU-451307	0	1
200	R-MMU-451308	0	1
201	R-MMU-451326	0	1
202	R-MMU-451927	1	0
203	R-MMU-453274	1	0
204	R-MMU-453279	1	0
205	R-MMU-4570464	0	1
206	R-MMU-4615885	0	1
207	R-MMU-4641262	0	1
208	R-MMU-4641265	1	1
209	R-MMU-480985	0	1
210	R-MMU-512988	1	0
211	R-MMU-5218920	0	1
212	R-MMU-5218921	1	0
213	R-MMU-532668	1	1
214	R-MMU-5357801	1	1
215	R-MMU-5357905	1	0
216	R-MMU-5357956	1	0
217	R-MMU-556833	0	1
218	R-MMU-5576891	0	1
219	R-MMU-5576893	0	1
220	R-MMU-5576894	0	1
221	R-MMU-5607763	0	1
222	R-MMU-5607764	1	0
223	R-MMU-5617833	1	1
224	R-MMU-5620912	0	1
225	R-MMU-5620916	0	1
226	R-MMU-5621481	0	1
227	R-MMU-5653656	1	0
228	R-MMU-5654696	0	1
229	R-MMU-5663220	0	1
230	R-MMU-5673000	1	1
231	R-MMU-5673001	1	0
232	R-MMU-5683057	1	0
233	R-MMU-5684996	1	0
234	R-MMU-597592	1	1
235	R-MMU-6794361	1	1
236	R-MMU-6794362	1	1
237	R-MMU-6804758	1	1
238	R-MMU-6806834	1	1
239	R-MMU-6807004	1	1
240	R-MMU-6811436	1	0
241	R-MMU-6811558	1	0
242	R-MMU-6814848	1	0
243	R-MMU-68877	0	1
244	R-MMU-68884	0	1
245	R-MMU-68886	0	1
246	R-MMU-69206	1	0
247	R-MMU-69273	1	0
248	R-MMU-69275	1	0
249	R-MMU-69278	1	1
250	R-MMU-70153	0	1
251	R-MMU-71032	1	1
252	R-MMU-71387	0	1
253	R-MMU-71403	1	1
254	R-MMU-71406	0	1
255	R-MMU-72202	0	1
256	R-MMU-73887	1	0
257	R-MMU-74749	1	1
258	R-MMU-74751	1	1
259	R-MMU-74752	1	0
260	R-MMU-75893	1	0
261	R-MMU-75896	1	0
262	R-MMU-76002	1	1
263	R-MMU-844456	1	0
264	R-MMU-877300	0	1
265	R-MMU-877312	1	1
266	R-MMU-881907	1	0
267	R-MMU-8848021	1	0
268	R-MMU-8849468	1	0
269	R-MMU-8849471	1	0
270	R-MMU-8851805	1	0
271	R-MMU-8851907	0	1
272	R-MMU-8853659	1	1
273	R-MMU-8856825	1	0
274	R-MMU-8856828	1	0
275	R-MMU-8876198	1	0
276	R-MMU-888590	1	0
277	R-MMU-901042	1	1
278	R-MMU-909733	0	1
279	R-MMU-912526	1	0
280	R-MMU-912631	0	1
281	R-MMU-912694	0	1
282	R-MMU-913531	0	1
283	R-MMU-937061	1	1
284	R-MMU-975138	1	1
285	R-MMU-975155	1	1
286	R-MMU-975871	1	1
287	R-MMU-983705	1	0

## Sheet: 3y5_overlap_GO
universe		A	B
1	R-MMU-109581	1	0
2	R-MMU-109582	1	0
3	R-MMU-110362	0	1
4	R-MMU-110373	0	1
5	R-MMU-110381	0	1
6	R-MMU-112399	1	0
7	R-MMU-112409	1	0
8	R-MMU-112412	1	0
9	R-MMU-114508	1	0
10	R-MMU-114604	1	0
11	R-MMU-1168372	1	0
12	R-MMU-1257604	1	0
13	R-MMU-1280218	1	0
14	R-MMU-139853	1	0
15	R-MMU-1433557	1	0
16	R-MMU-1483191	1	0
17	R-MMU-1483257	1	0
18	R-MMU-156711	1	0
19	R-MMU-157118	1	0
20	R-MMU-159236	0	1
21	R-MMU-1655829	1	0
22	R-MMU-166520	1	0
23	R-MMU-167044	1	0
24	R-MMU-168256	1	0
25	R-MMU-169893	1	0
26	R-MMU-170834	1	0
27	R-MMU-170968	1	0
28	R-MMU-170984	1	0
29	R-MMU-177929	1	0
30	R-MMU-179812	1	0
31	R-MMU-180292	1	0
32	R-MMU-180336	1	0
33	R-MMU-1855191	1	0
34	R-MMU-186763	1	0
35	R-MMU-186797	1	0
36	R-MMU-187037	1	0
37	R-MMU-187687	1	0
38	R-MMU-187706	1	0
39	R-MMU-193639	1	0
40	R-MMU-193692	1	0
41	R-MMU-193704	1	0
42	R-MMU-194138	1	0
43	R-MMU-195253	1	0
44	R-MMU-196299	1	0
45	R-MMU-1980143	1	0
46	R-MMU-198203	1	0
47	R-MMU-199418	1	0
48	R-MMU-199991	1	0
49	R-MMU-203927	1	0
50	R-MMU-204998	1	0
51	R-MMU-205043	1	0
52	R-MMU-209543	1	0
53	R-MMU-2122948	1	0
54	R-MMU-212436	1	0
55	R-MMU-2172127	1	0
56	R-MMU-2173795	1	0
57	R-MMU-2404192	1	0
58	R-MMU-2424491	1	0
59	R-MMU-2426168	1	0
60	R-MMU-2428924	1	0
61	R-MMU-2428928	1	0
62	R-MMU-2454202	1	0
63	R-MMU-2559580	1	0
64	R-MMU-2586552	1	0
65	R-MMU-2730905	1	0
66	R-MMU-2871796	1	0
67	R-MMU-352238	1	0
68	R-MMU-373755	1	0
69	R-MMU-373760	1	0
70	R-MMU-375165	1	0
71	R-MMU-388841	1	0
72	R-MMU-389356	1	0
73	R-MMU-389359	1	0
74	R-MMU-392451	1	0
75	R-MMU-392499	1	0
76	R-MMU-397795	1	0
77	R-MMU-418346	1	0
78	R-MMU-418360	1	0
79	R-MMU-418597	1	0
80	R-MMU-420597	1	0
81	R-MMU-422475	1	0
82	R-MMU-433692	1	0
83	R-MMU-4419969	1	0
84	R-MMU-4420097	1	0
85	R-MMU-446199	1	0
86	R-MMU-446203	1	0
87	R-MMU-449147	1	0
88	R-MMU-451927	1	0
89	R-MMU-4641257	0	1
90	R-MMU-4641262	1	0
91	R-MMU-500753	1	0
92	R-MMU-512988	1	0
93	R-MMU-5218920	1	0
94	R-MMU-5218921	1	0
95	R-MMU-535734	1	0
96	R-MMU-5357801	1	0
97	R-MMU-5624138	1	0
98	R-MMU-5633007	1	0
99	R-MMU-5649702	0	1
100	R-MMU-5651801	0	1
101	R-MMU-5653656	1	0
102	R-MMU-5654727	1	0
103	R-MMU-5673001	1	0
104	R-MMU-5682910	1	0
105	R-MMU-5683057	1	0
106	R-MMU-5684996	1	0
107	R-MMU-5688426	0	1
108	R-MMU-5689880	0	1
109	R-MMU-597592	1	0
110	R-MMU-6804757	1	0
111	R-MMU-6806003	1	0
112	R-MMU-6811436	1	0
113	R-MMU-6811442	1	0
114	R-MMU-6811558	1	0
115	R-MMU-6814848	1	0
116	R-MMU-68884	1	0
117	R-MMU-69273	1	0
118	R-MMU-69478	1	0
119	R-MMU-70171	0	1
120	R-MMU-70263	0	1
121	R-MMU-70326	0	1
122	R-MMU-72202	0	1
123	R-MMU-73884	0	1
124	R-MMU-73930	0	1
125	R-MMU-73933	0	1
126	R-MMU-74160	1	0
127	R-MMU-74259	1	0
128	R-MMU-74751	1	0
129	R-MMU-74752	1	0
130	R-MMU-75105	1	0
131	R-MMU-75109	1	0
132	R-MMU-8849471	1	0
133	R-MMU-8853659	1	0
134	R-MMU-8856688	1	0
135	R-MMU-8937144	1	0
136	R-MMU-912526	1	0
137	R-MMU-936440	1	0
138	R-MMU-937072	1	0
139	R-MMU-983705	1	0

[truncated: 14 more sheets: 3y6_overlap_GO, 3y7_overlap_GO, 3y8_overlap_GO, 4a6_overlap_GO, 4a8_overlap_GO, 4a10_overlap_GO, 4a11_overlap_GO, 4a12_overlap_GO, 4y1_overlap_GO, 4y2_overlap_GO, 4y3_overlap_GO, 4y5_overlap_GO, 5y5_overlap_GO, 5y6_overlap_GO]
